# Supplementary material for: Iron nitrate/TEMPO-catalyzed aerobic oxidative synthesis of quinazolinones from alcohols and 2-aminobenzamides with air as the oxidant
Source: Royal Society of Chemistry journal article supplement (doi:10.1039/c6ra12164k), 2016-01-01

# Supporting Information

**Iron nitrate/TEMPO-catalyzed aerobic oxidative synthesis of quinazolinones from alcohols and  
2-aminobenzamides with air as the oxidant.**

Yongke Hu, Lei Chen and Bindong Li \*

School of Chemical Engineering, Nanjing University of Science and Technology, Nanjing 210094, P.  
R. China. E-mail: libindong@njjust.edu.cn

The  $^1\text{H}$  and  $^{13}\text{C}$  NMR spectra of compounds **3aa**

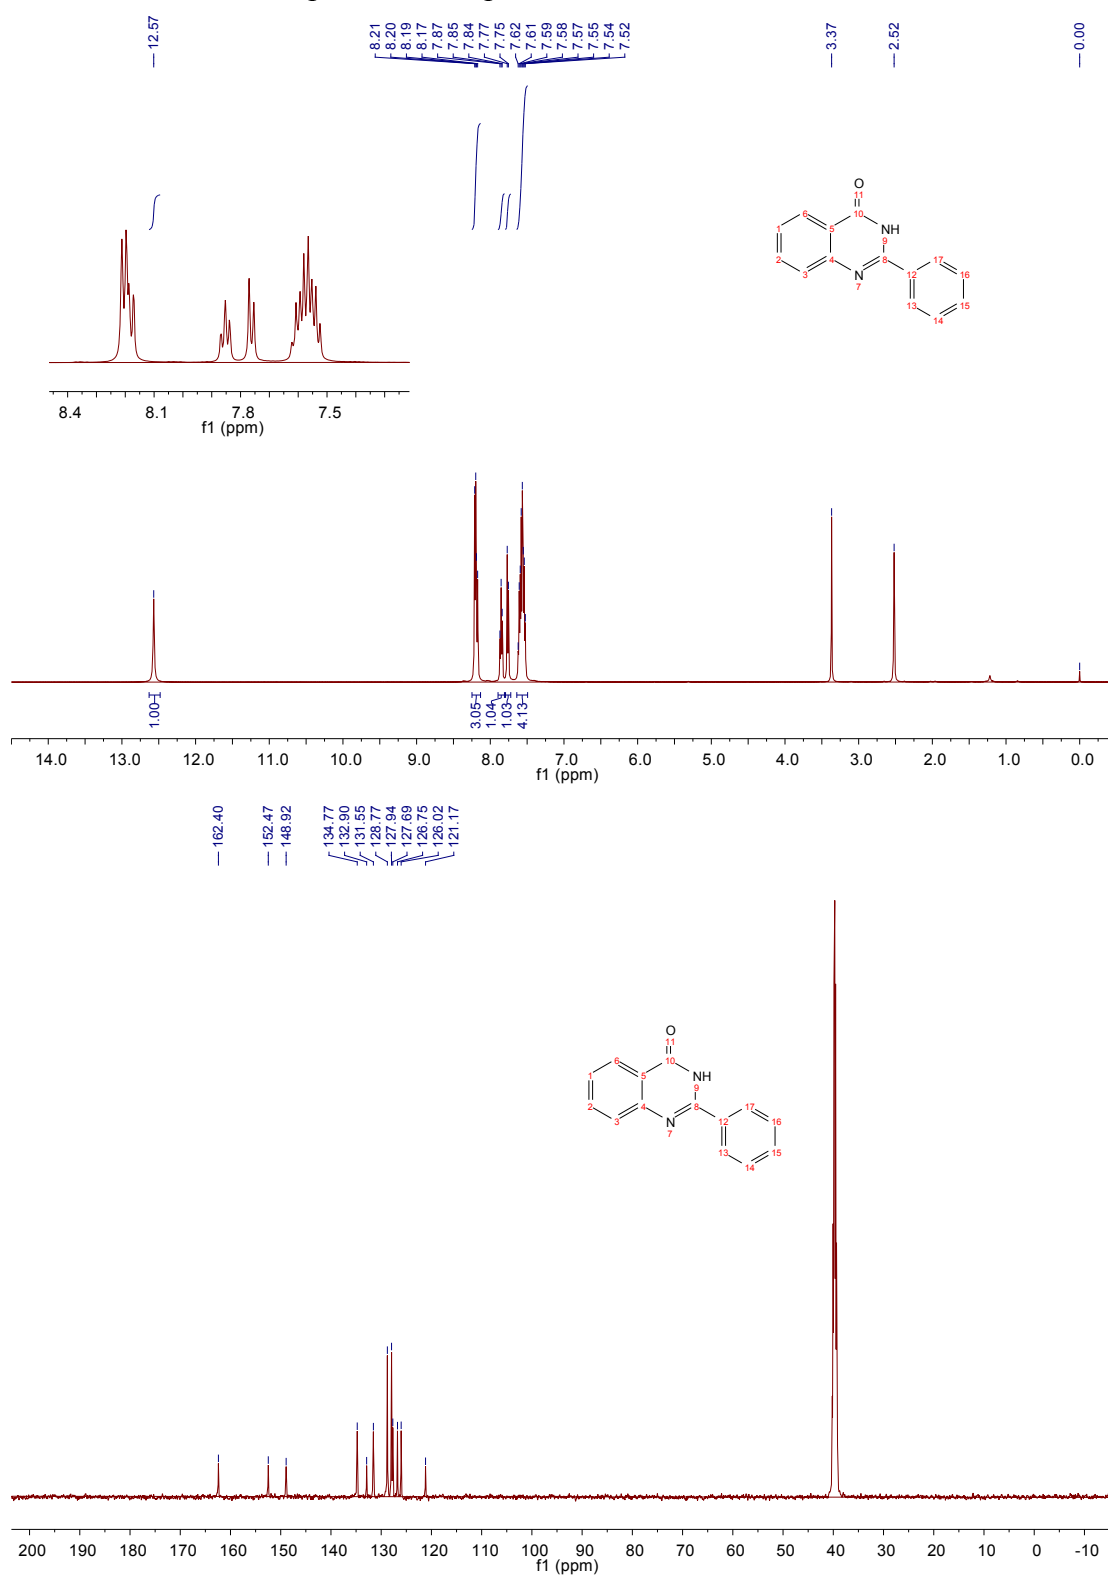

The  $^1\text{H}$  and  $^{13}\text{C}$  NMR spectra of compounds **3ab**

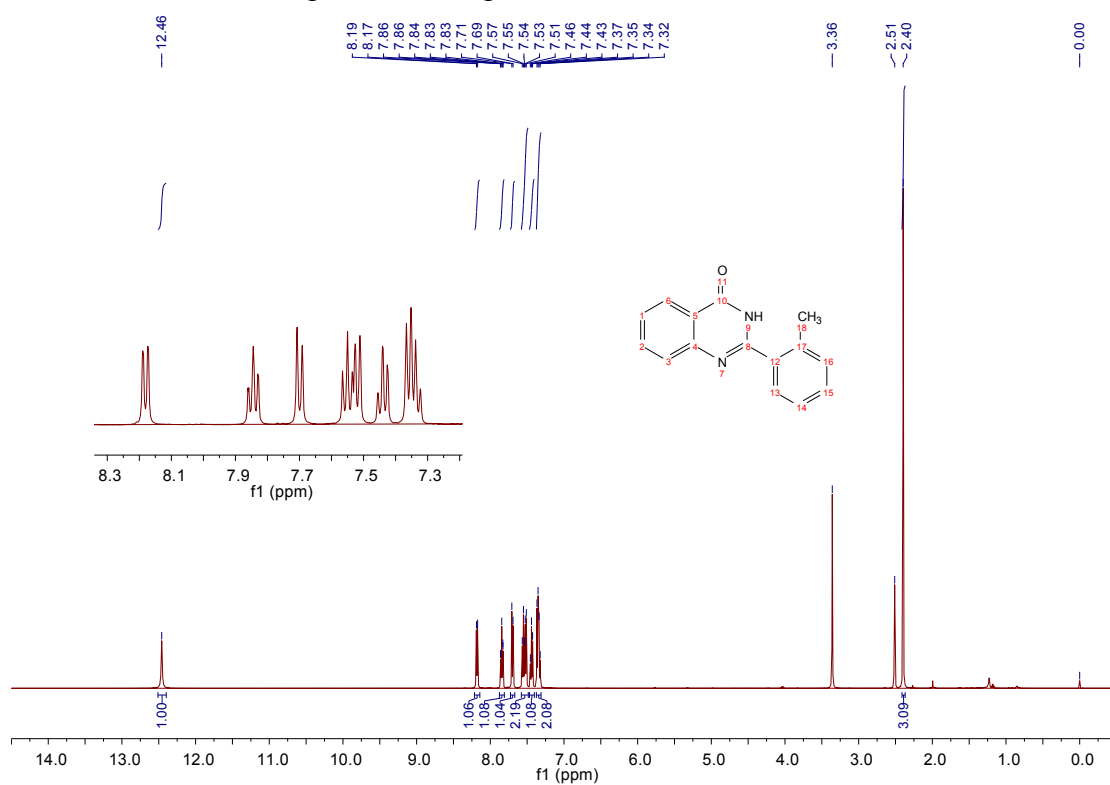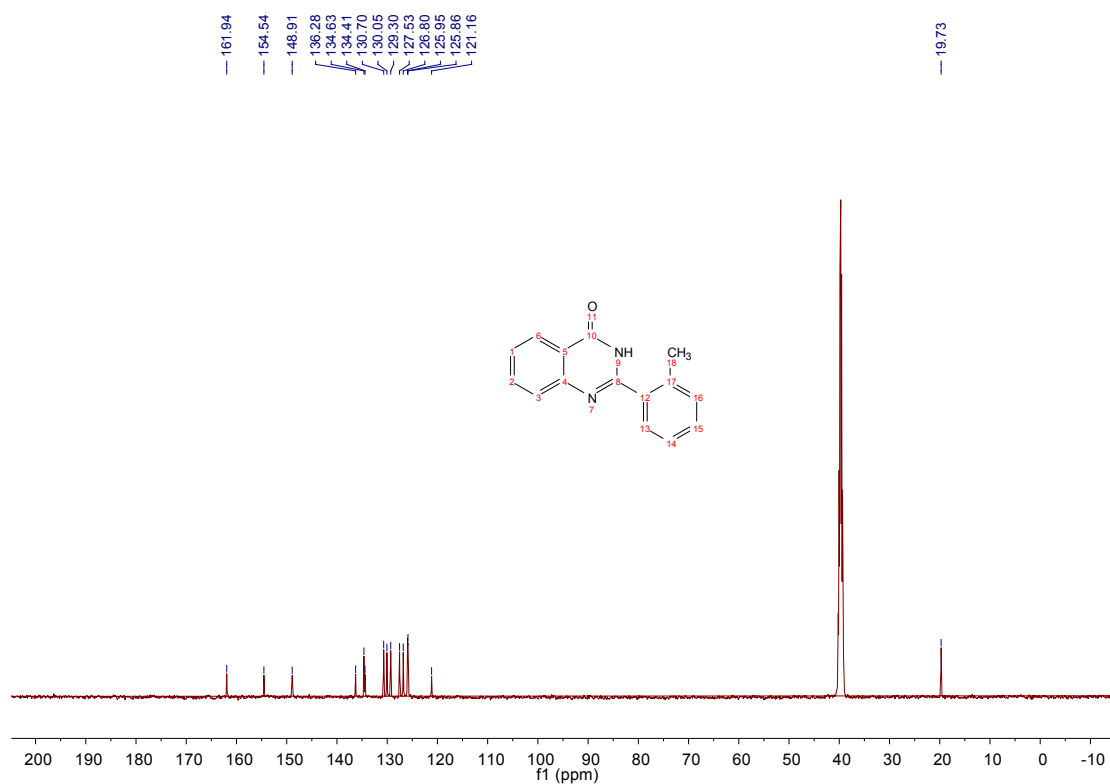

The  $^1\text{H}$  and  $^{13}\text{C}$  NMR spectra of compounds **3ac**

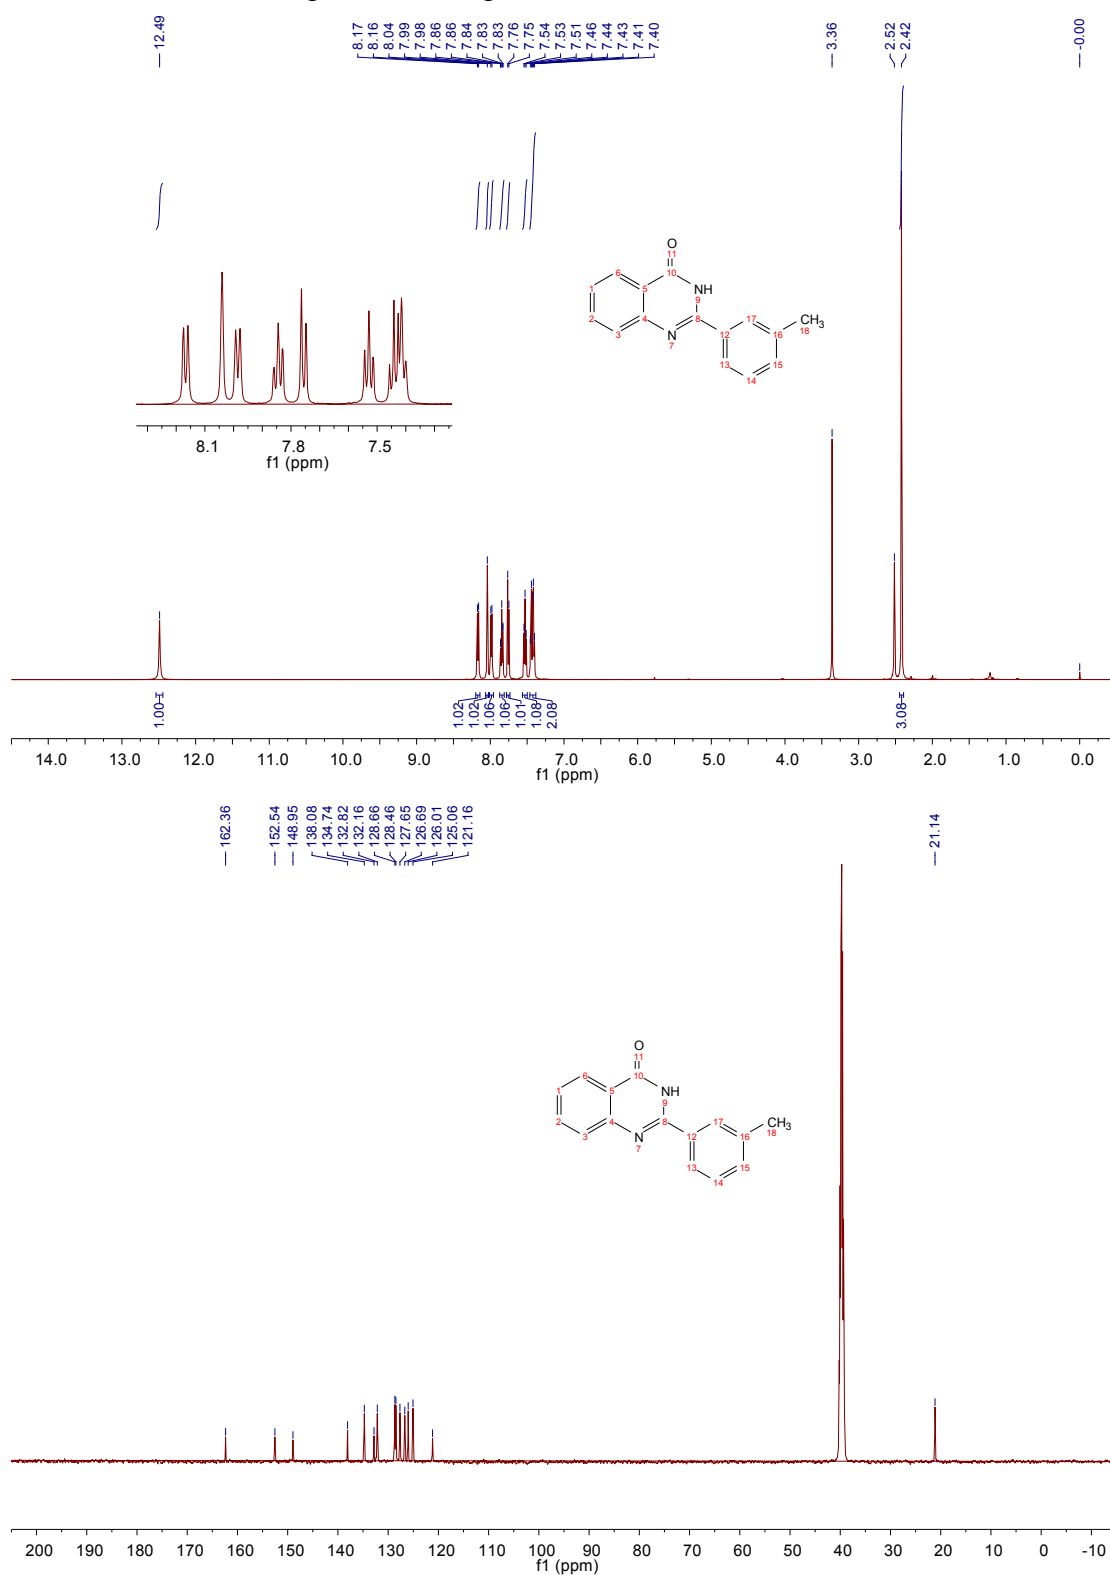

The  $^1\text{H}$  and  $^{13}\text{C}$  NMR spectra of compounds **3ad**

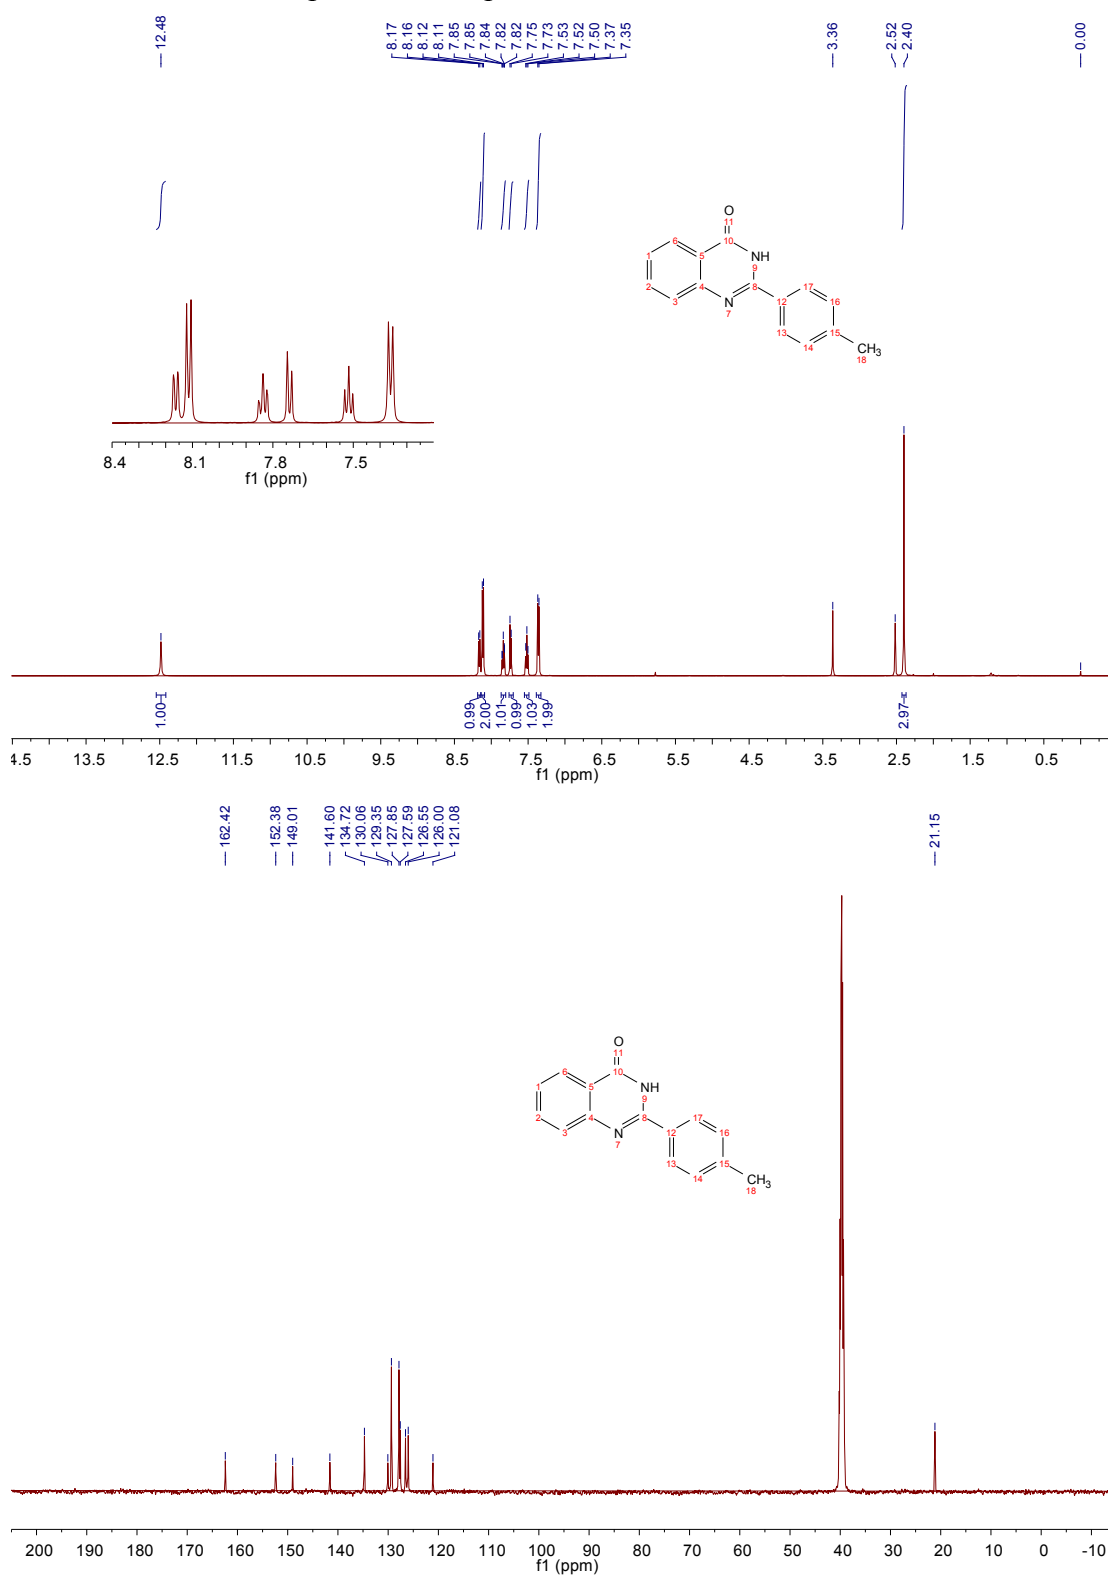

The  $^1\text{H}$  and  $^{13}\text{C}$  NMR spectra of compounds **3ae**

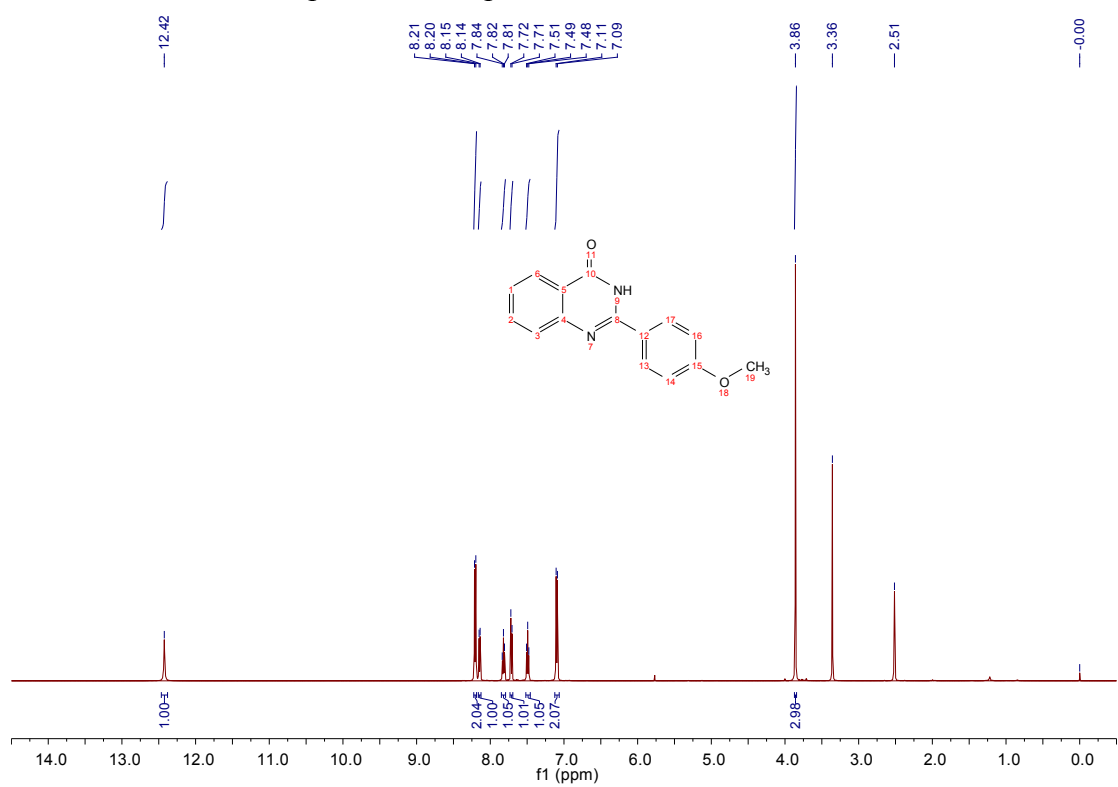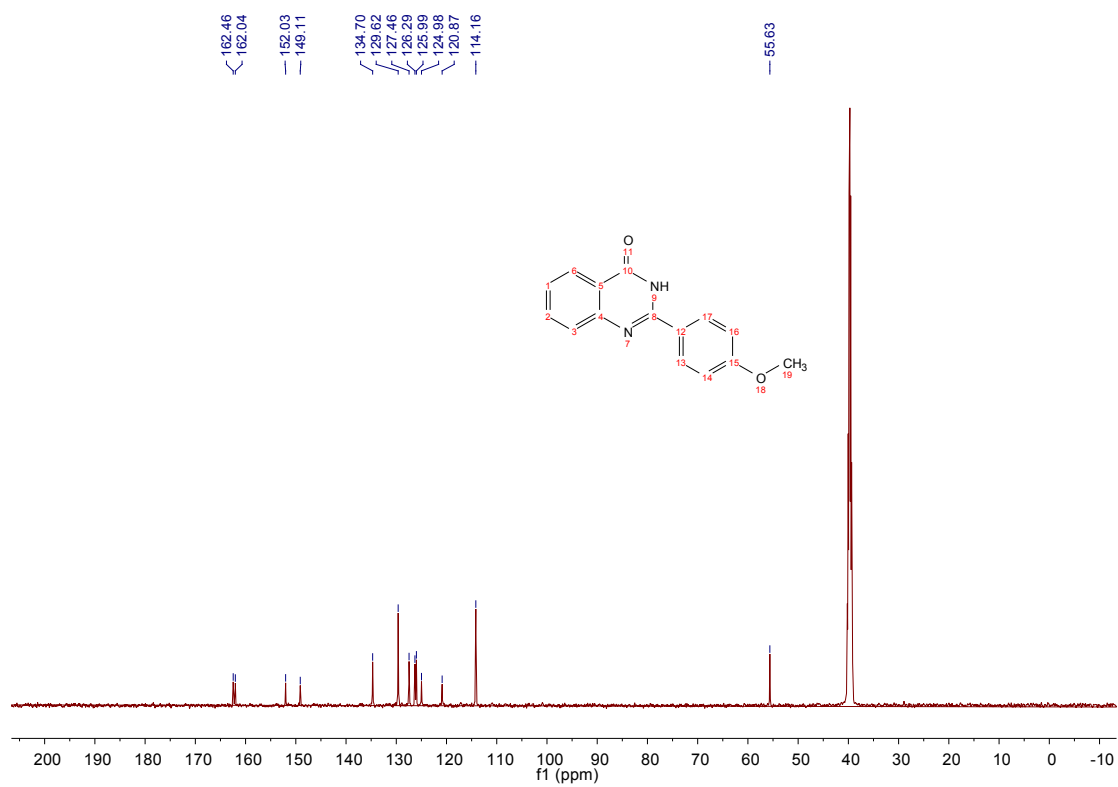

The  $^1\text{H}$  and  $^{13}\text{C}$  NMR spectra of compounds **3af**

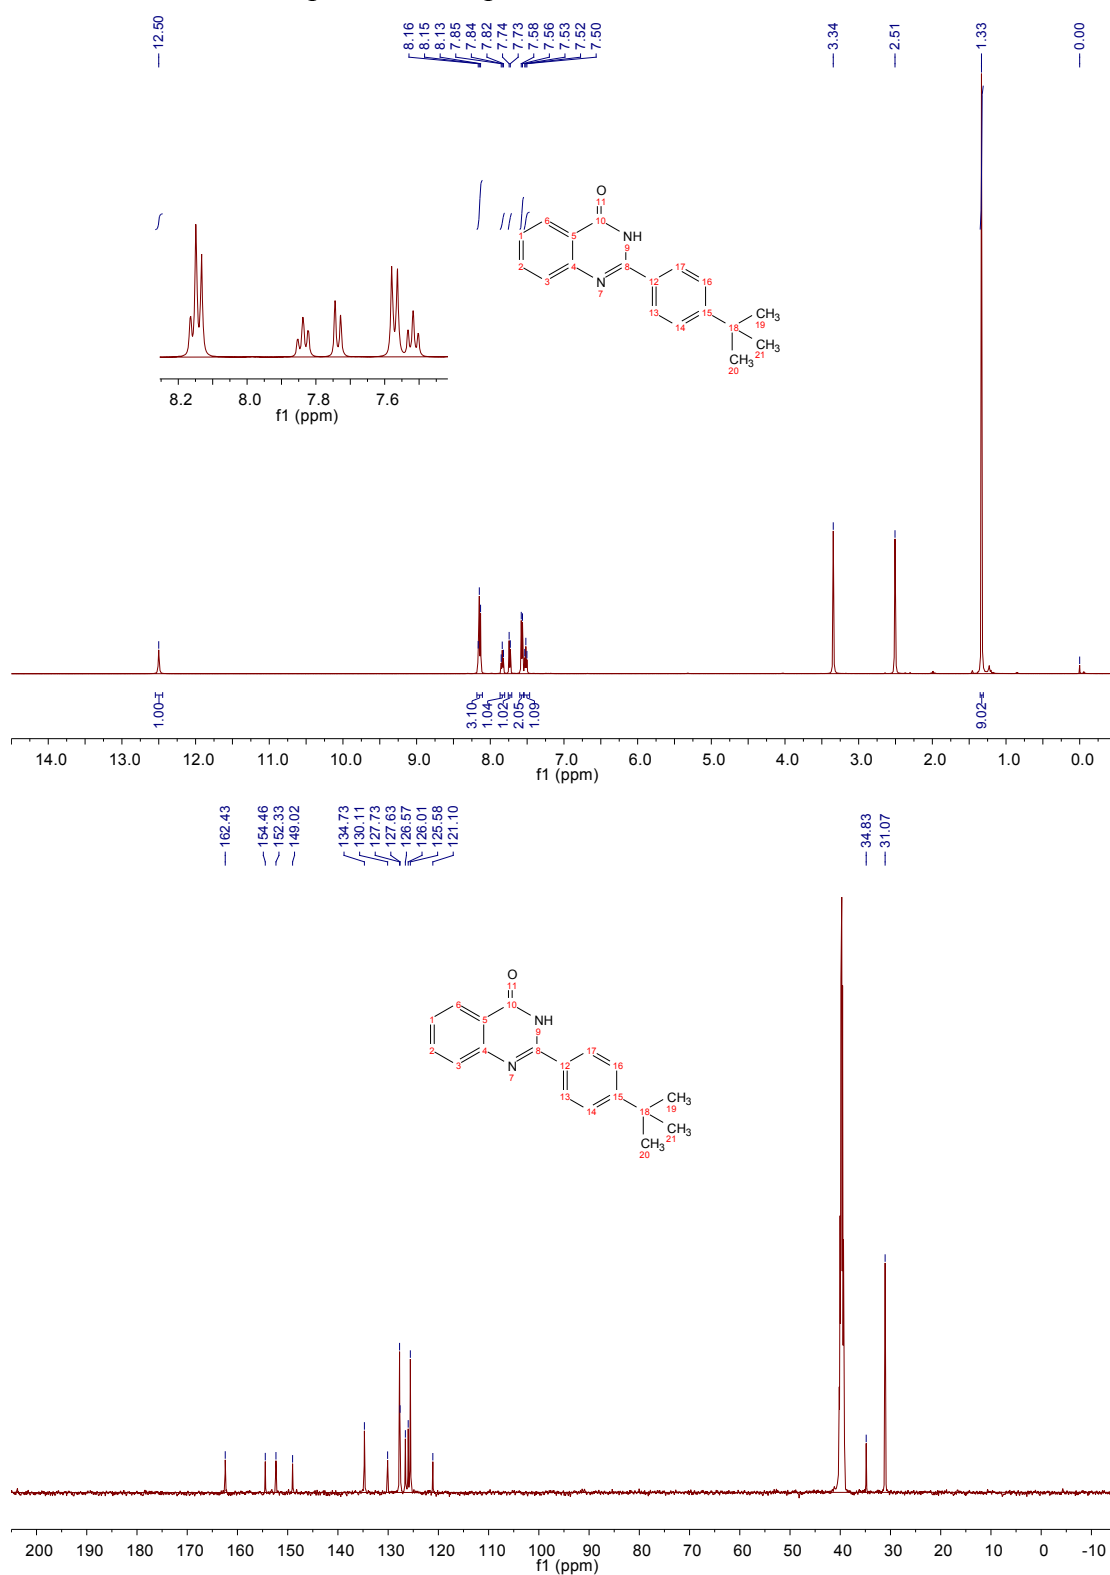

The  $^1\text{H}$  and  $^{13}\text{C}$  NMR spectra of compounds **3ag**

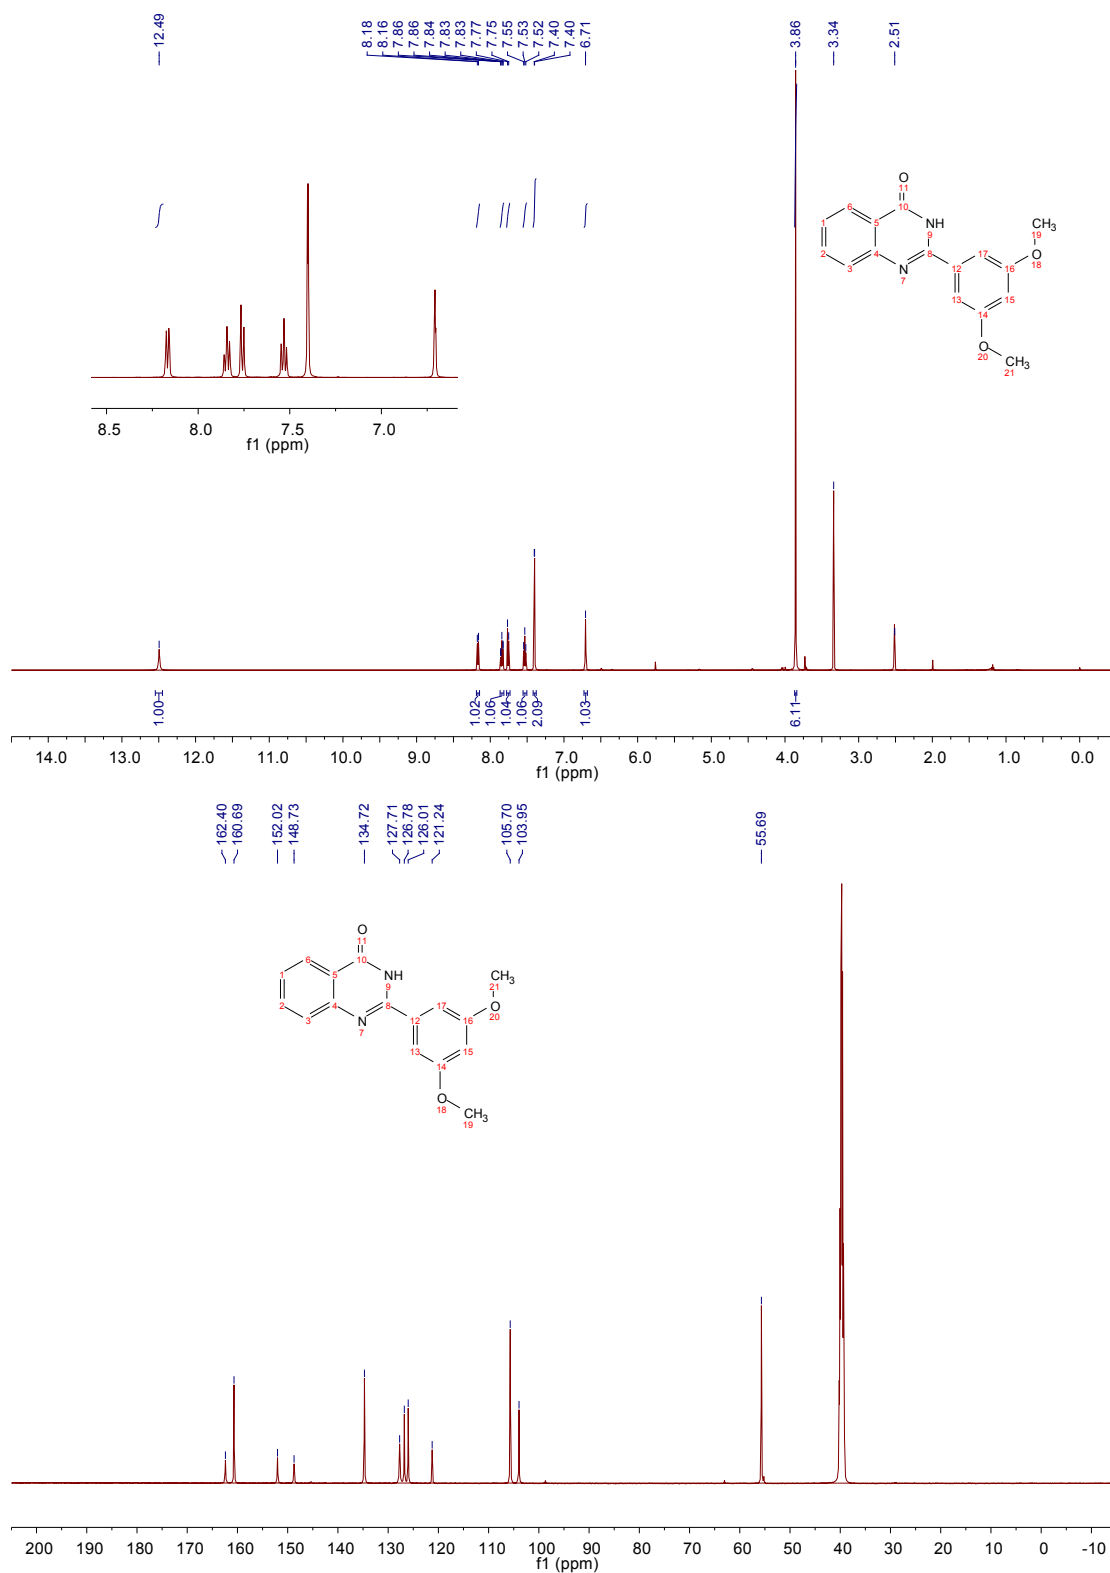



The  $^1\text{H}$  and  $^{13}\text{C}$  NMR spectra of compounds **3ah**

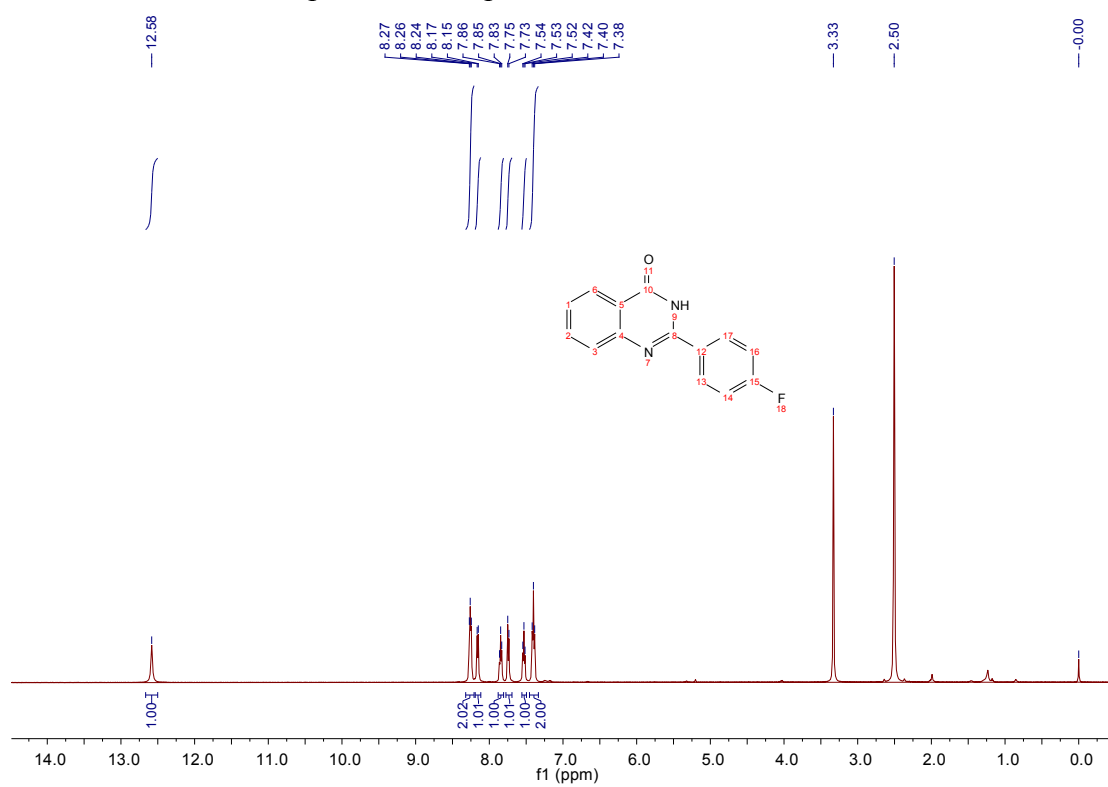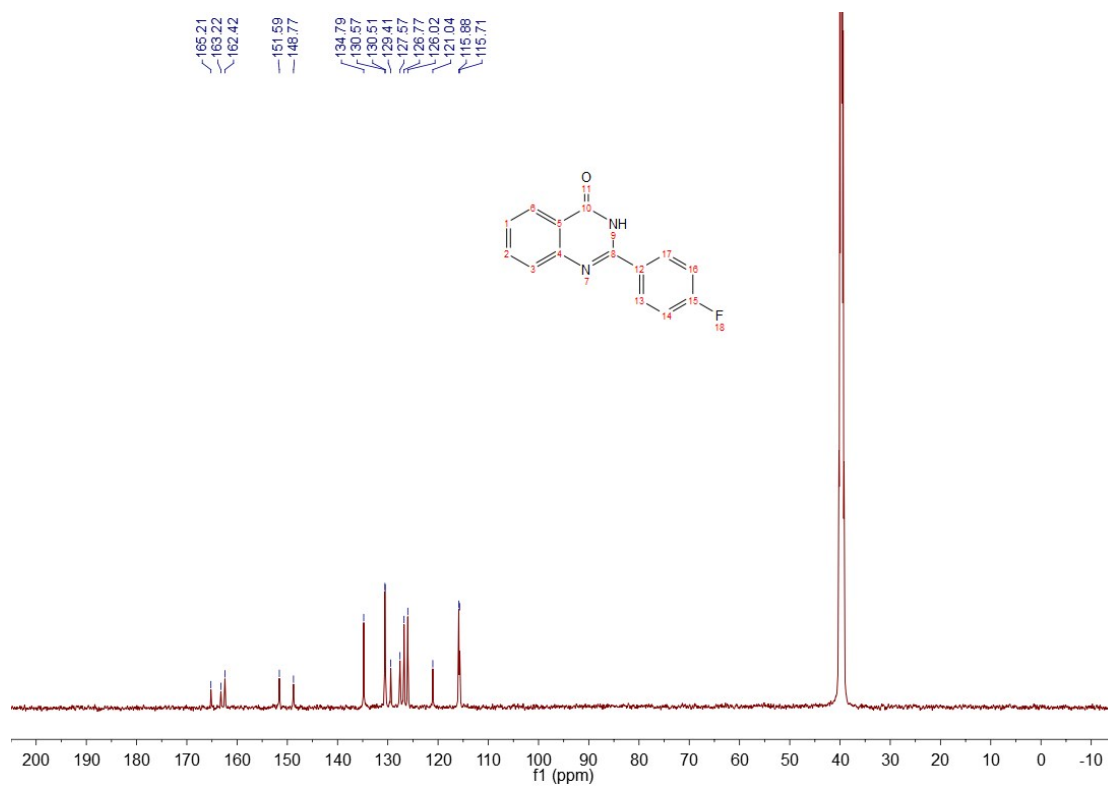

The  $^1\text{H}$  and  $^{13}\text{C}$  NMR spectra of compounds **3ai**

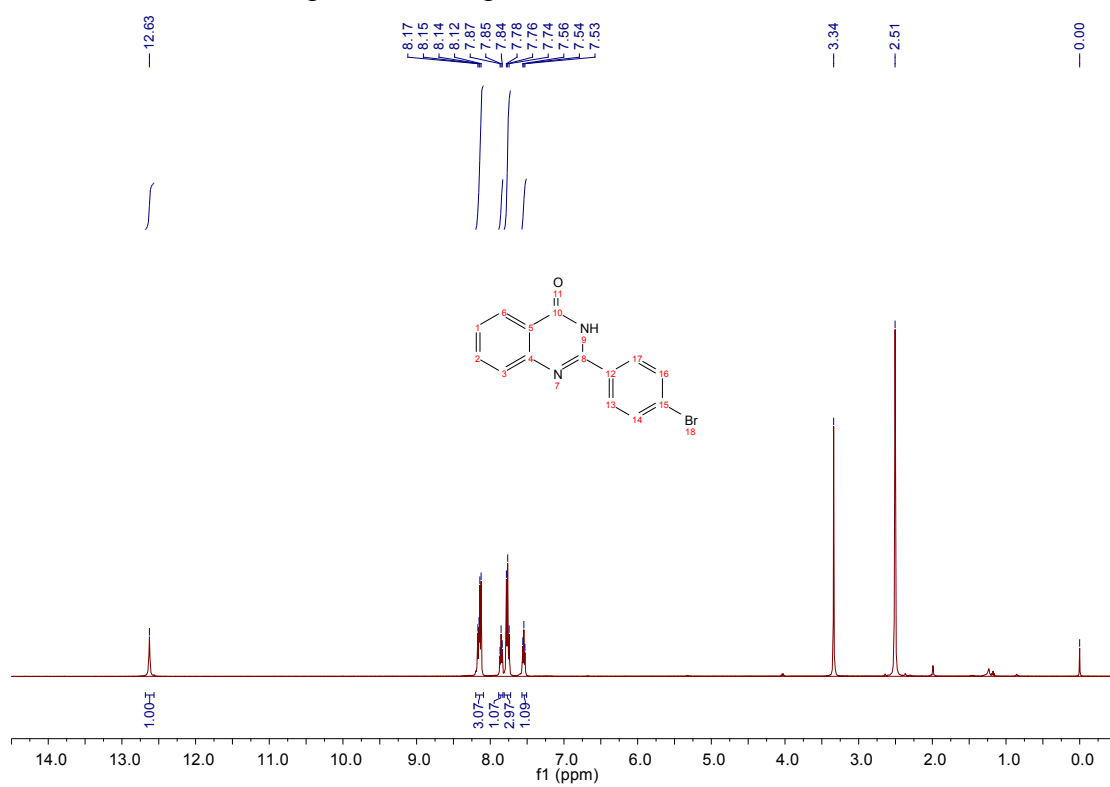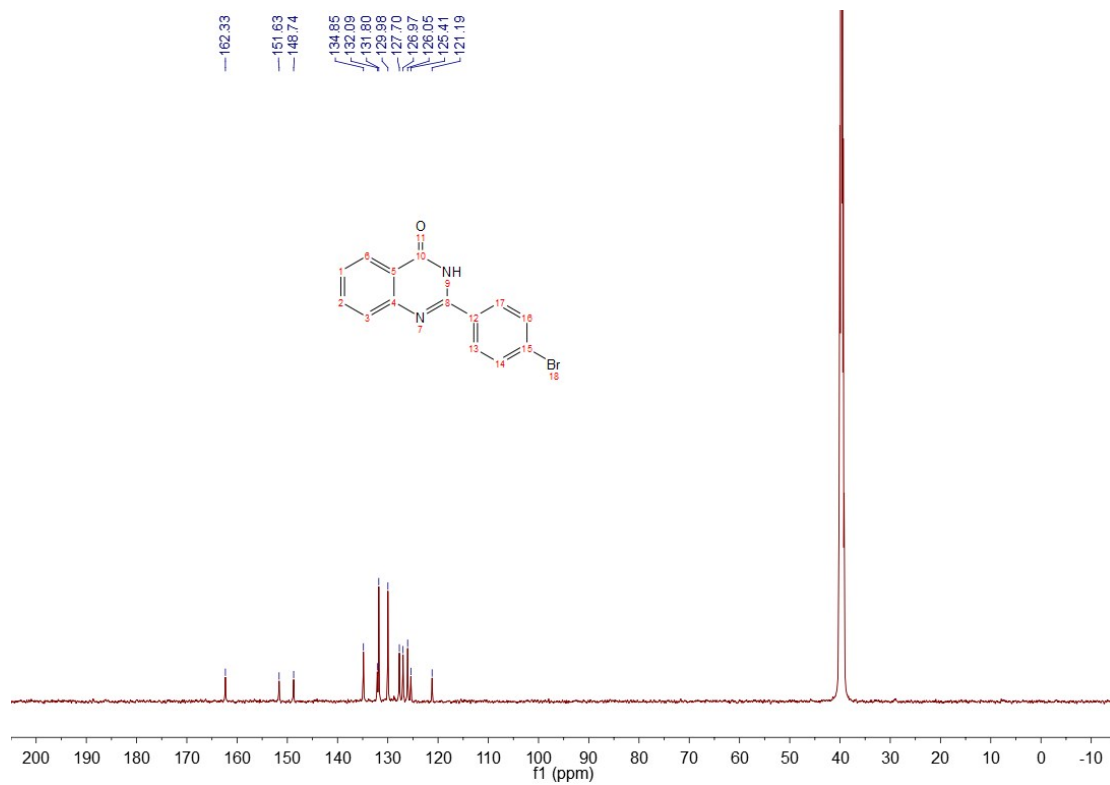

The  $^1\text{H}$  and  $^{13}\text{C}$  NMR spectra of compounds **3aj**

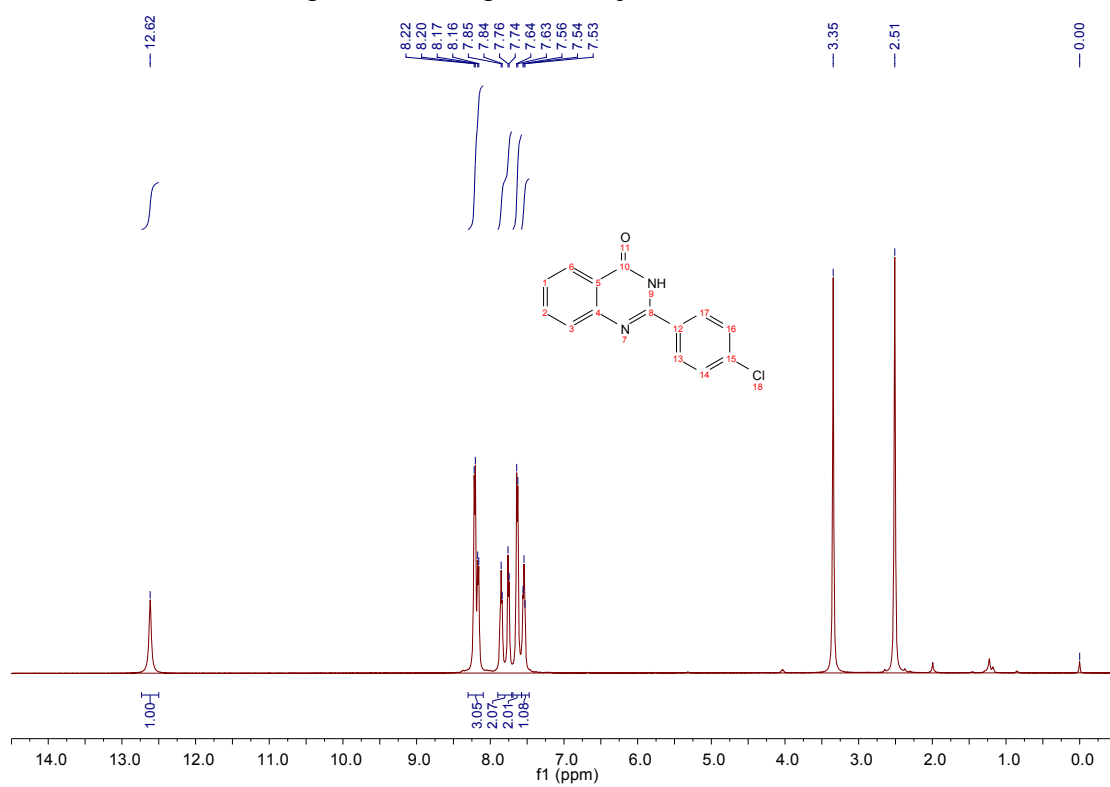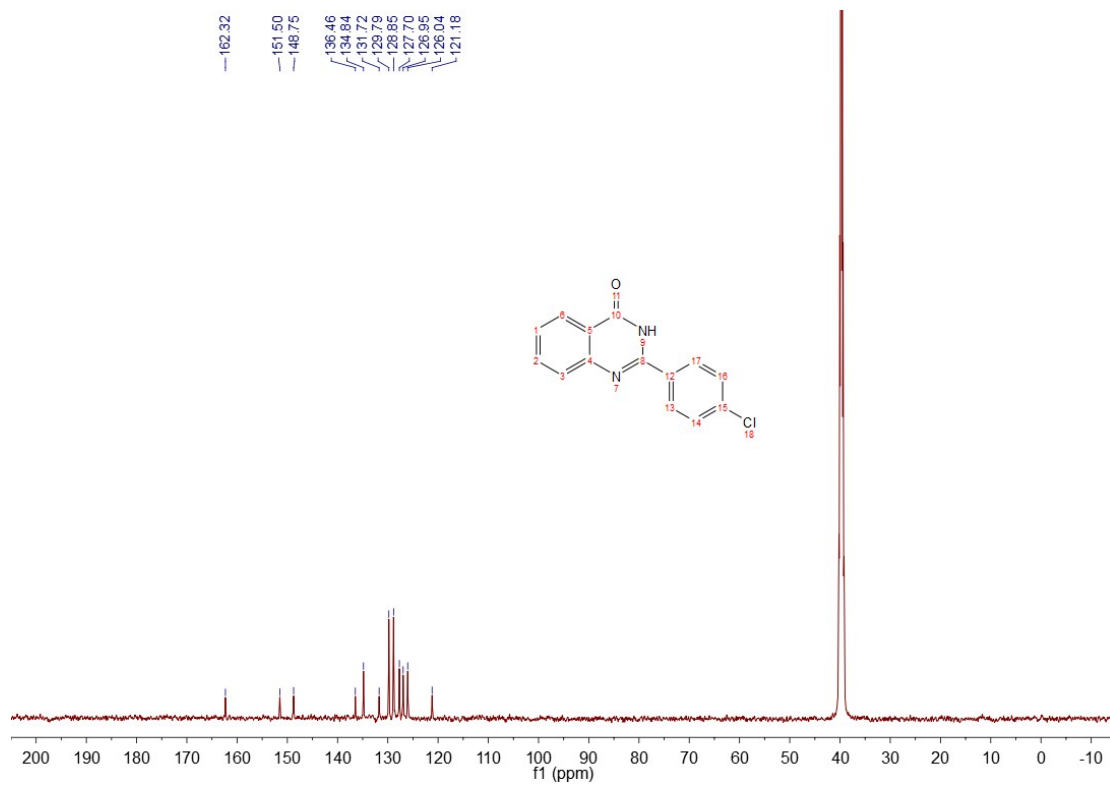

The  $^1\text{H}$  and  $^{13}\text{C}$  NMR spectra of compounds **3ak**

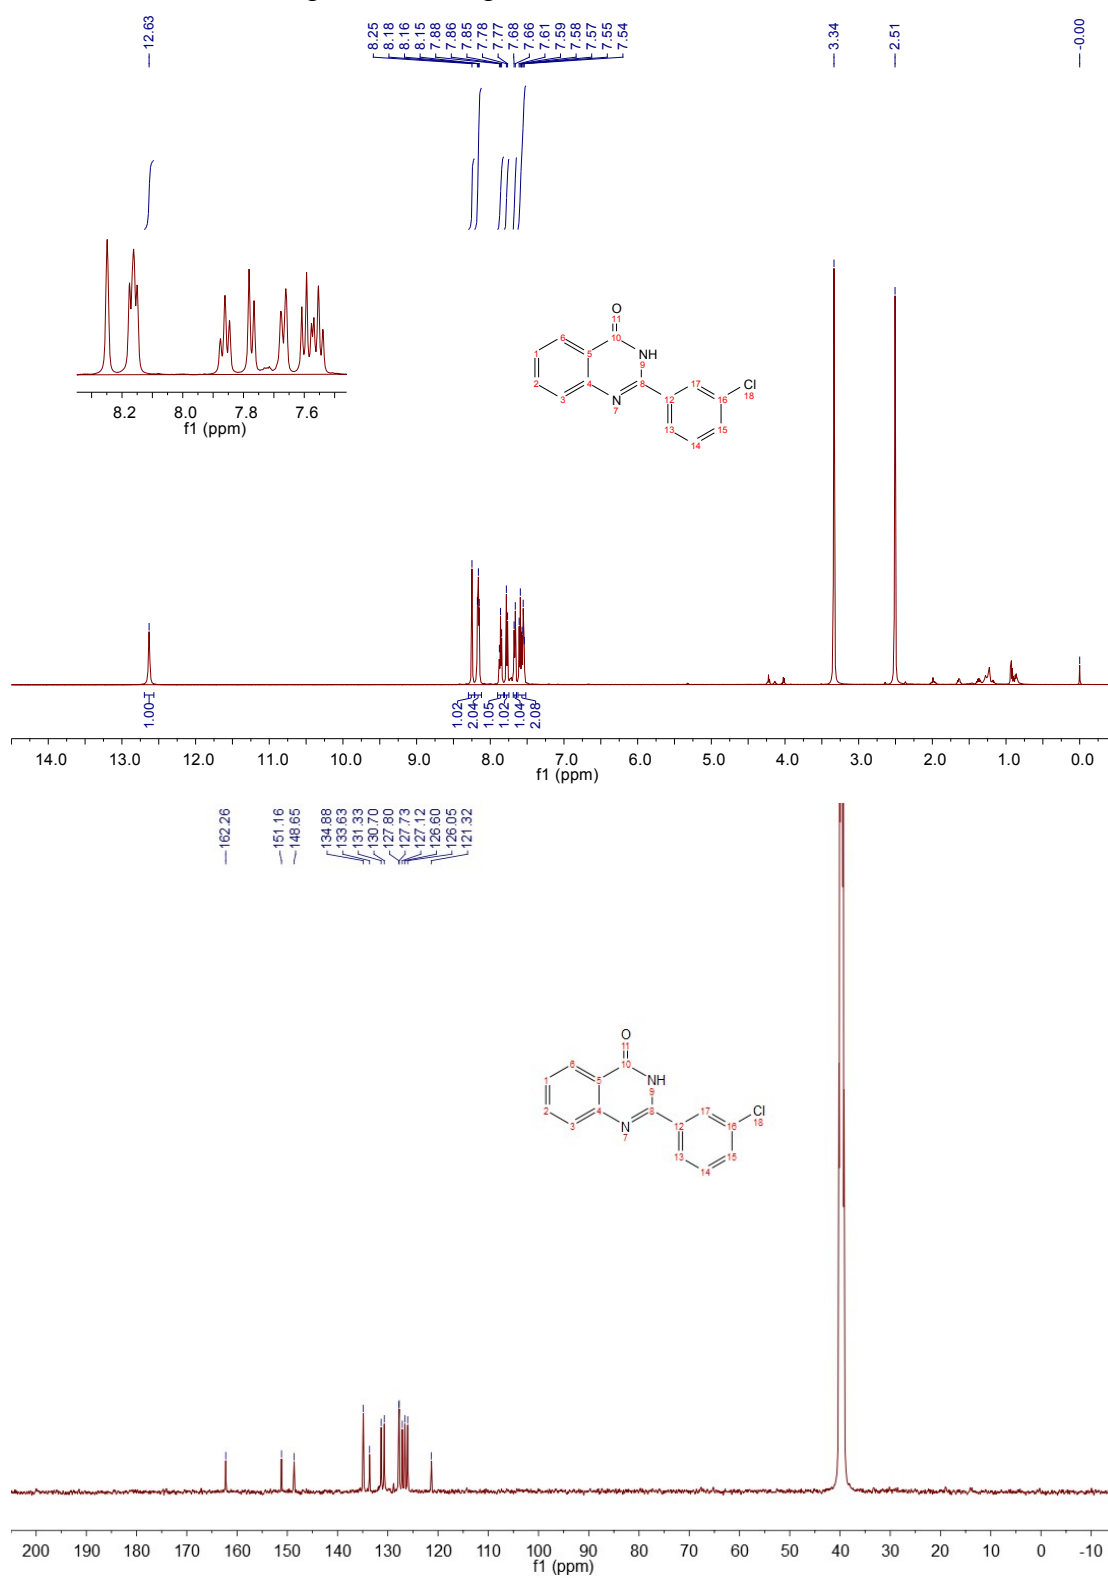

The  $^1\text{H}$  and  $^{13}\text{C}$  NMR spectra of compounds **3al**

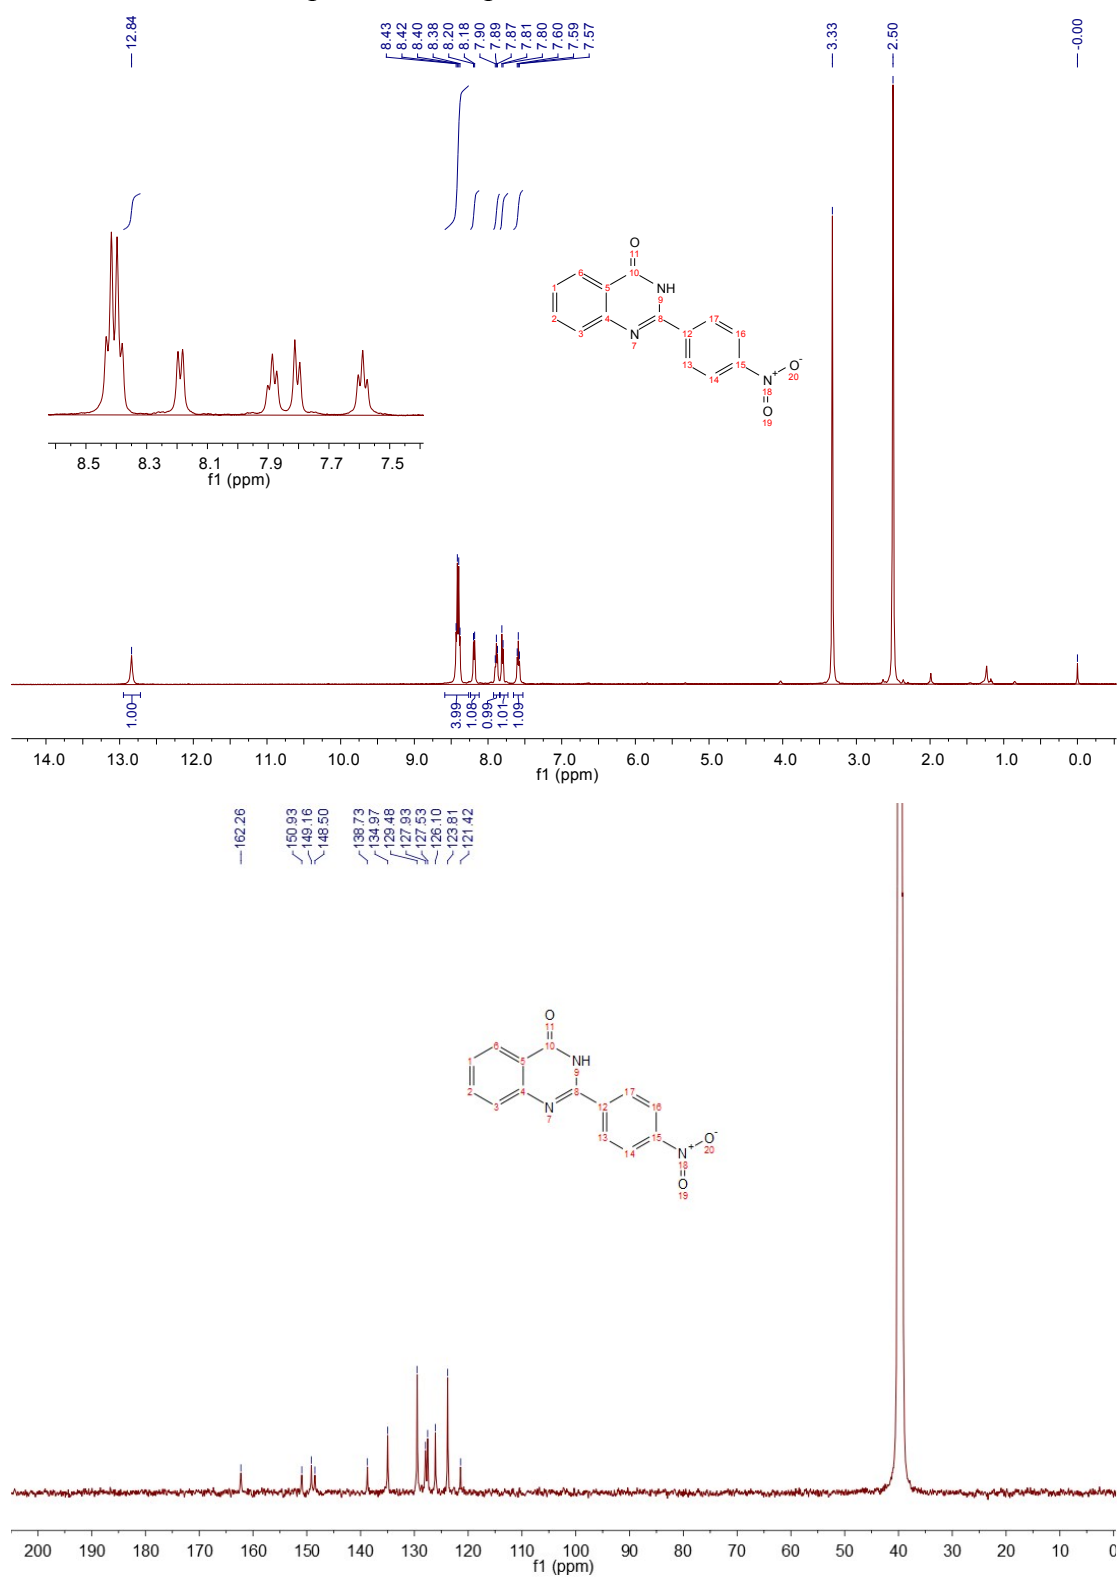

The  $^1\text{H}$  and  $^{13}\text{C}$  NMR spectra of compounds **3am**

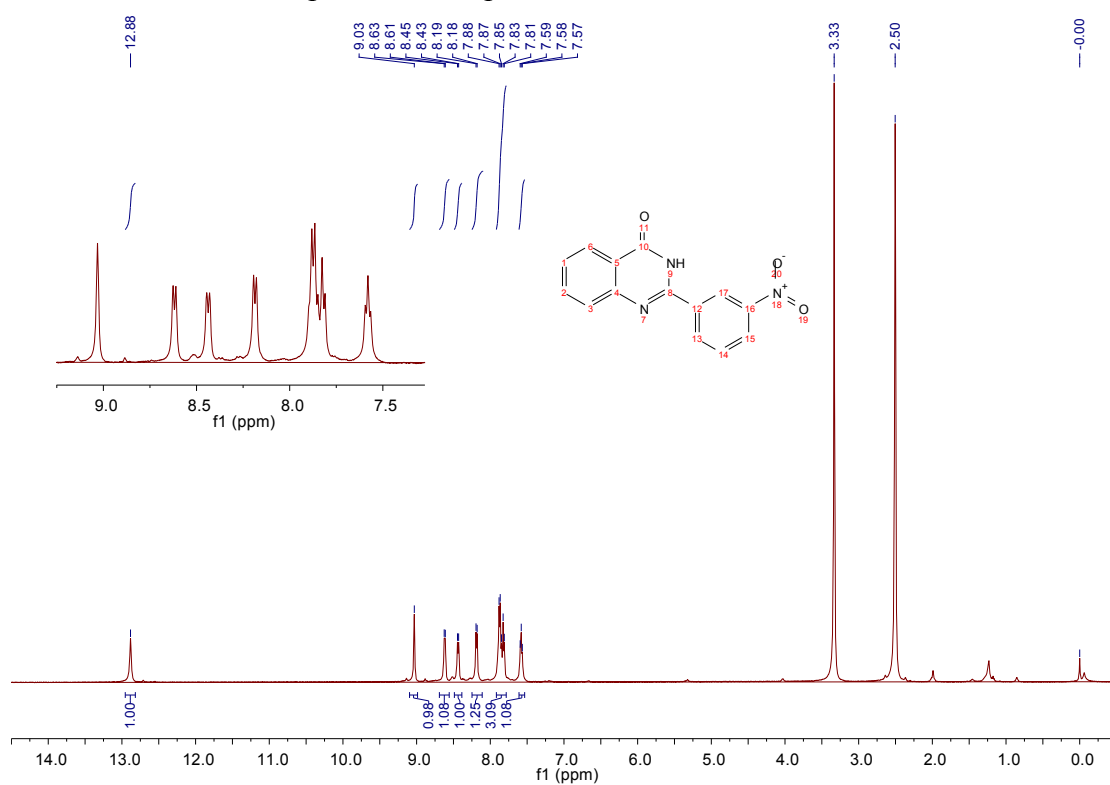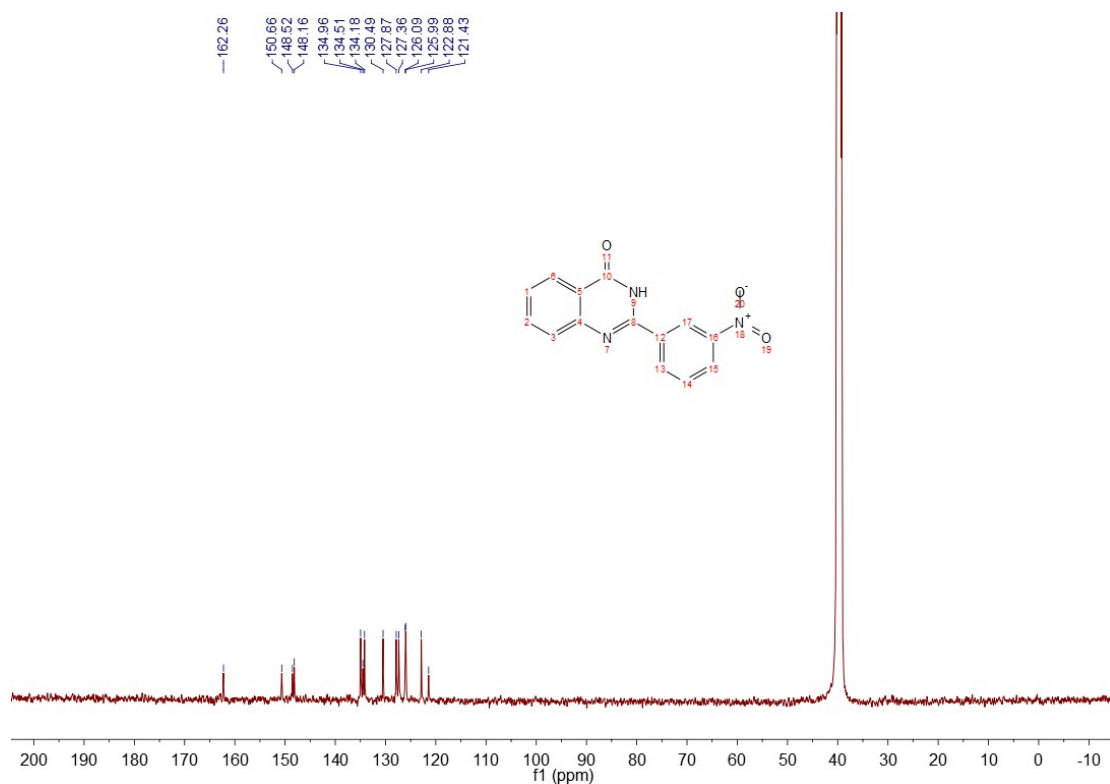

The  $^1\text{H}$  and  $^{13}\text{C}$  NMR spectra of compounds **3an**

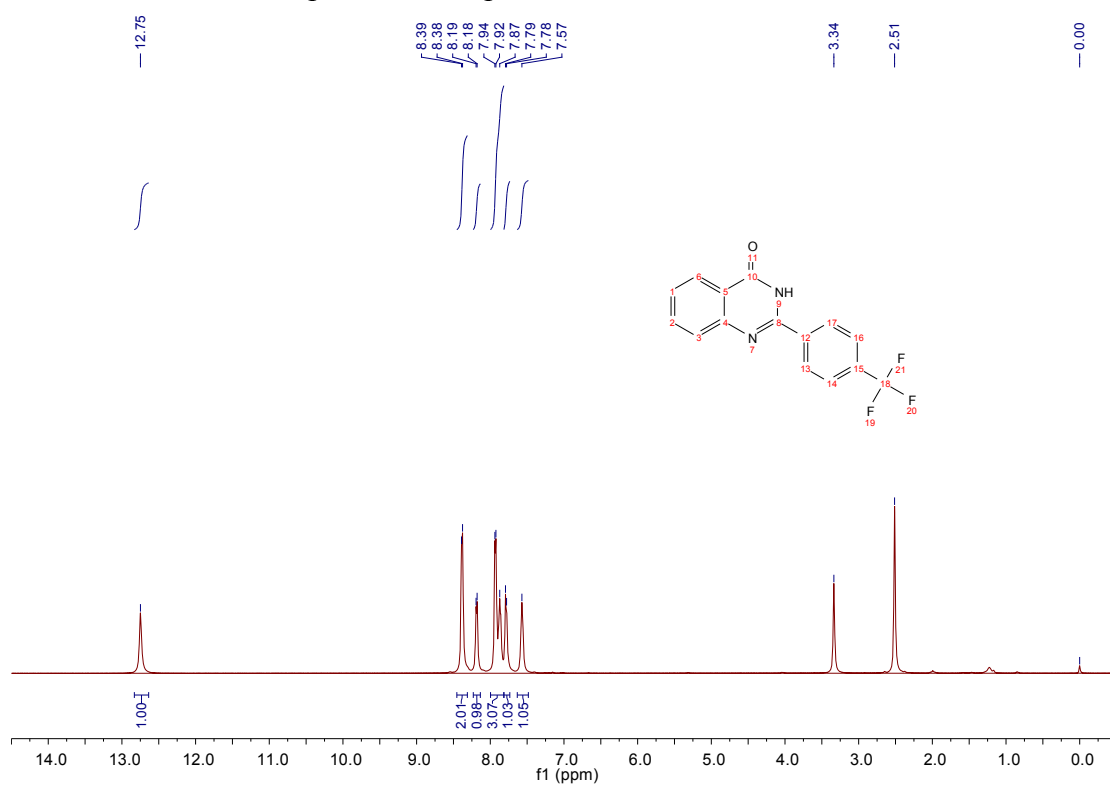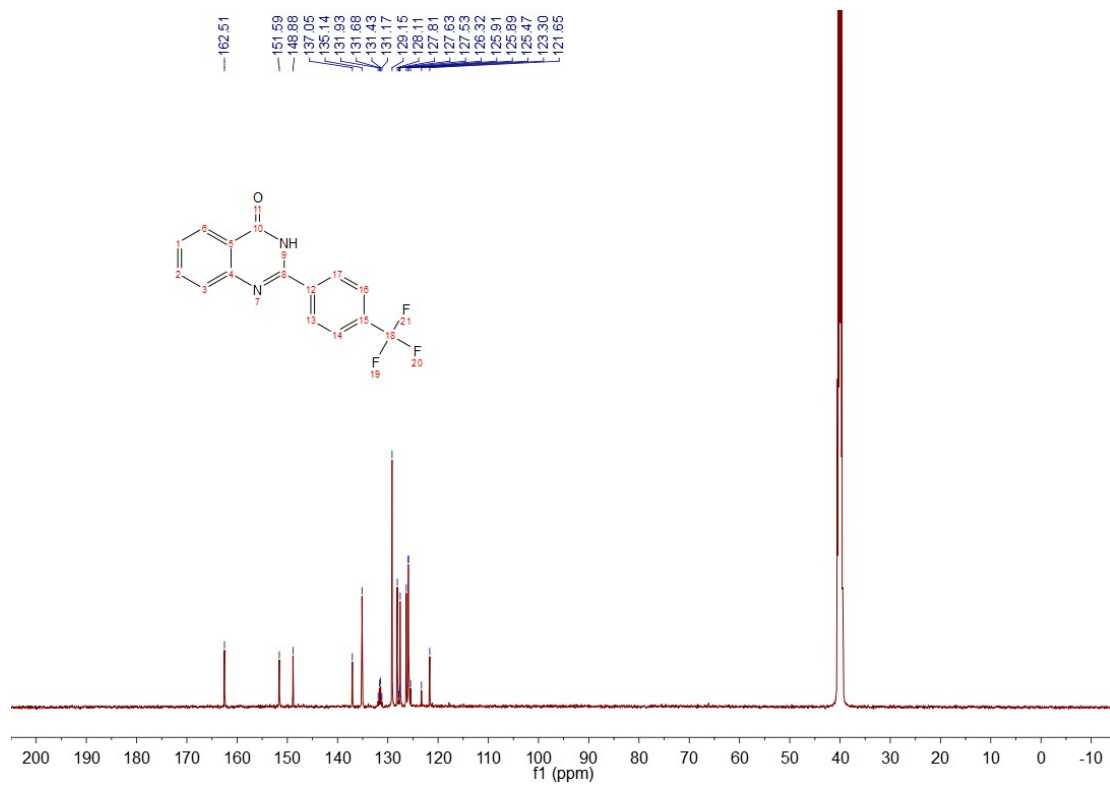

The  $^1\text{H}$  and  $^{13}\text{C}$  NMR spectra of compounds **3ao**

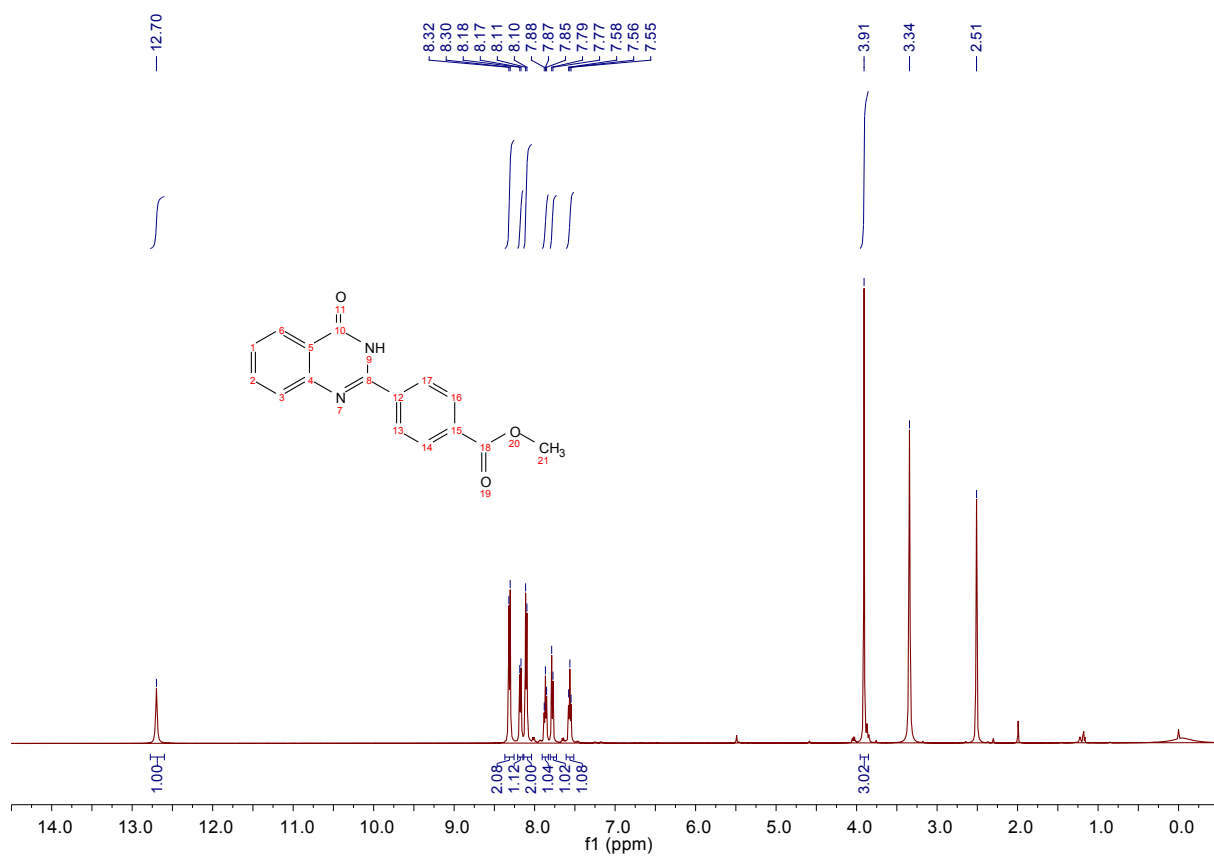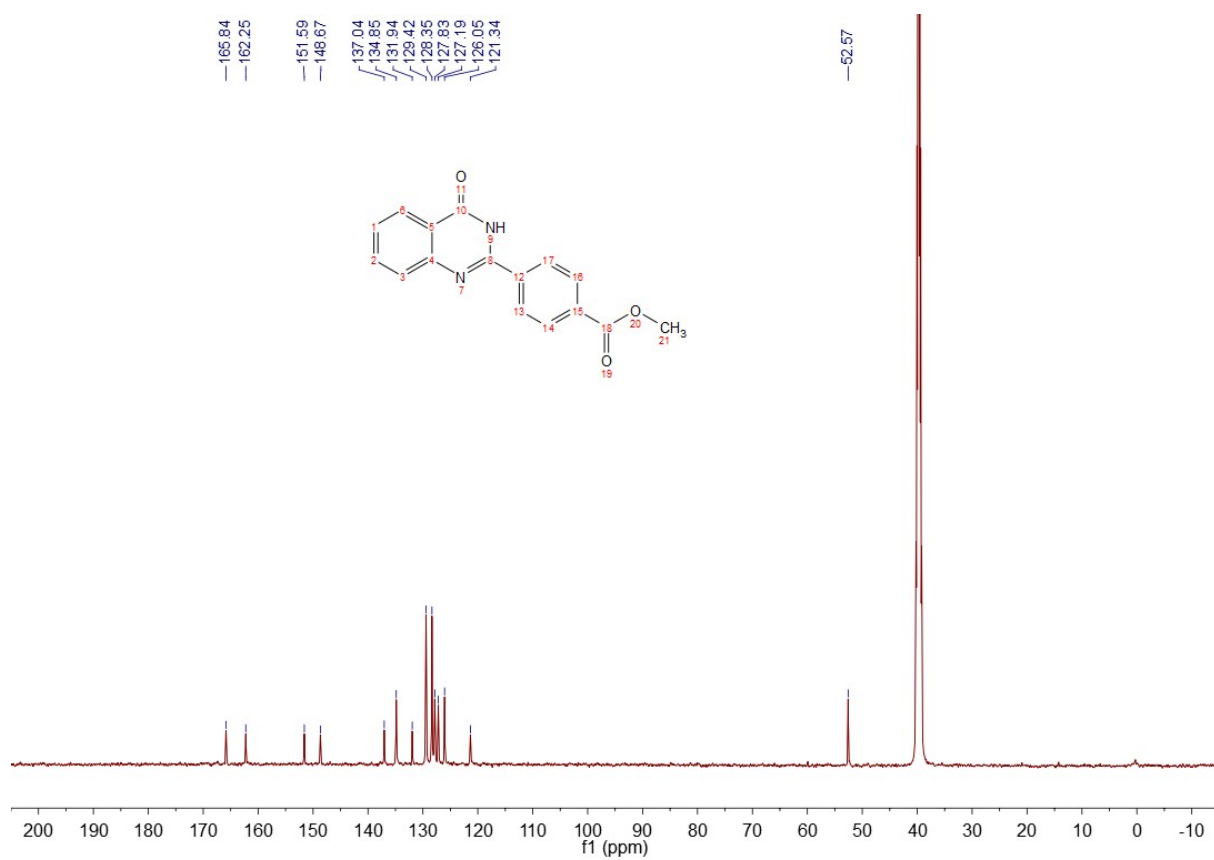



The  $^1\text{H}$  and  $^{13}\text{C}$  NMR spectra of compounds **3ap**

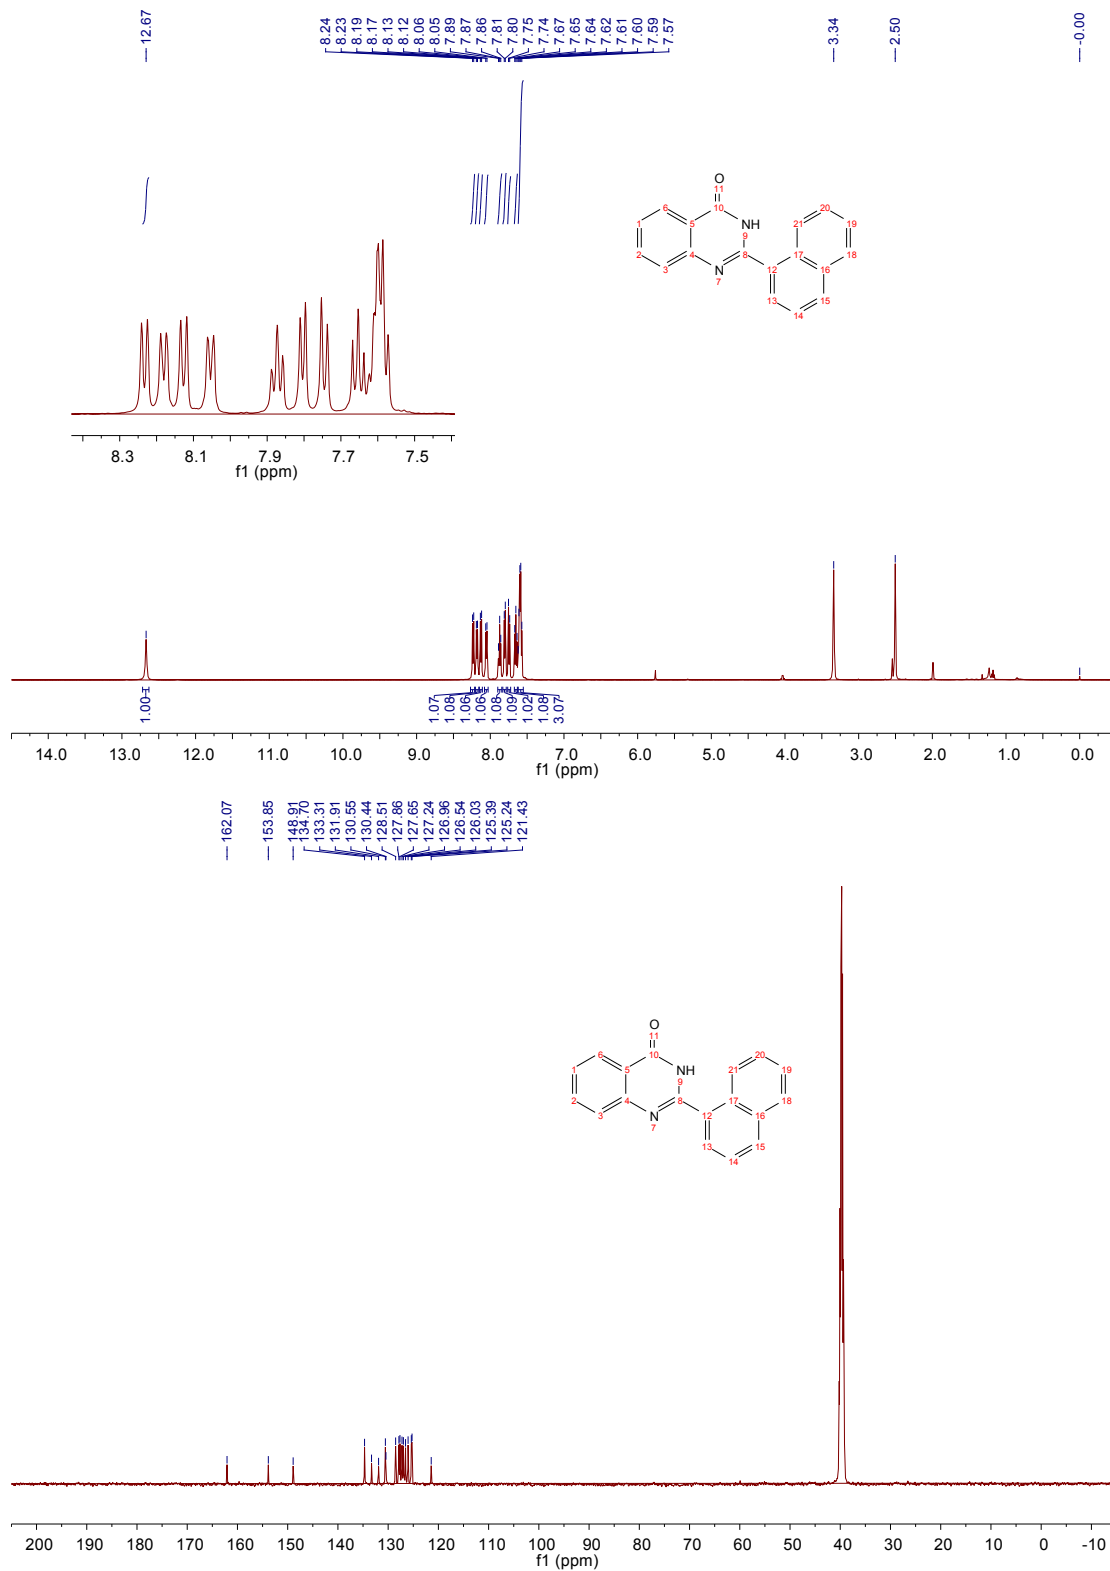

The  $^1\text{H}$  and  $^{13}\text{C}$  NMR spectra of compounds **3aq**

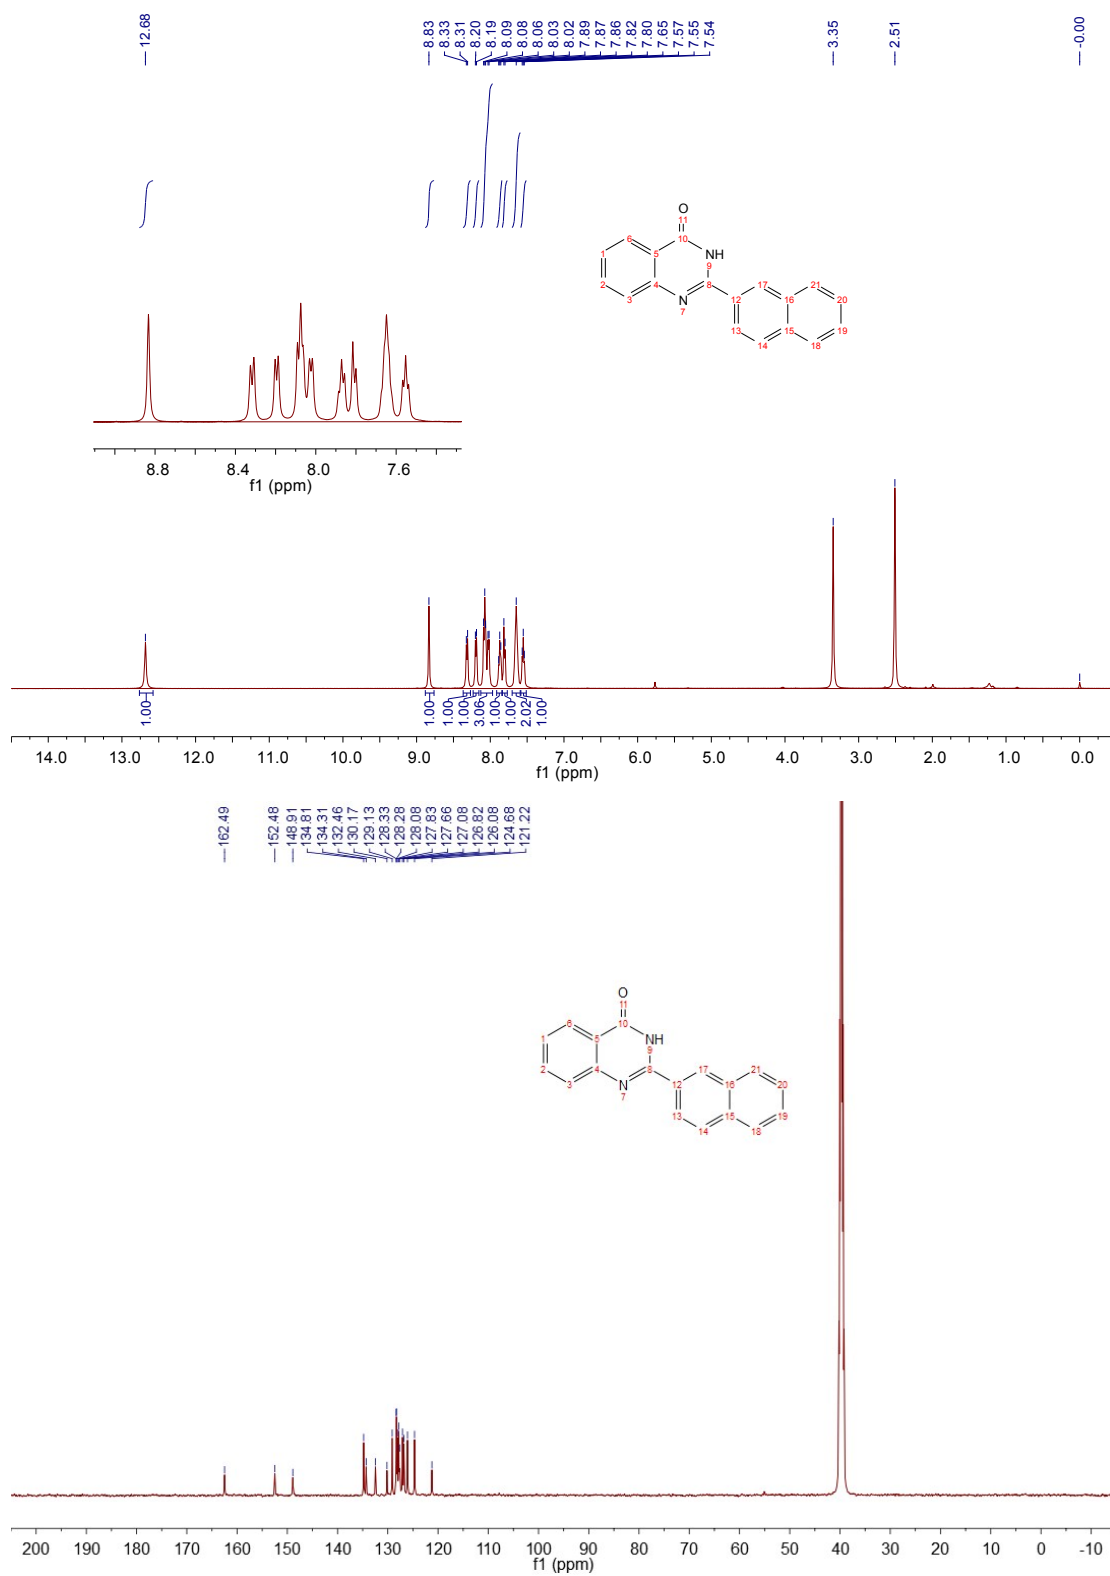

The  $^1\text{H}$  and  $^{13}\text{C}$  NMR spectra of compounds **3ar**

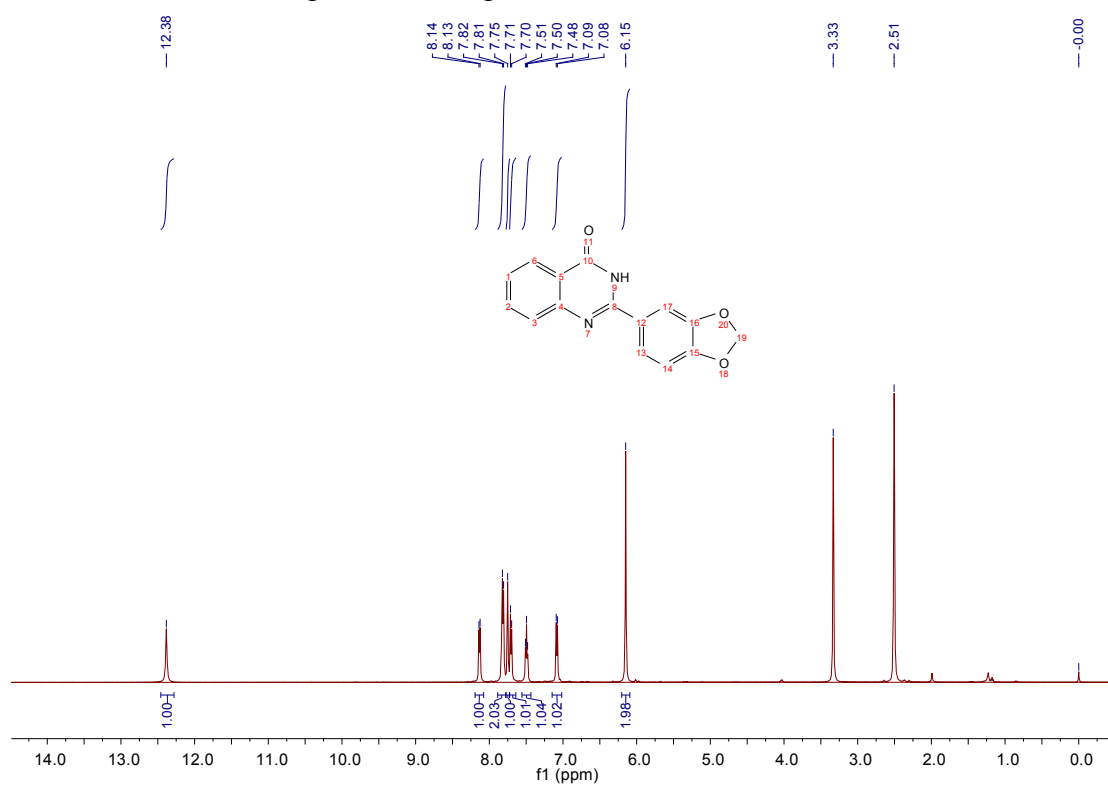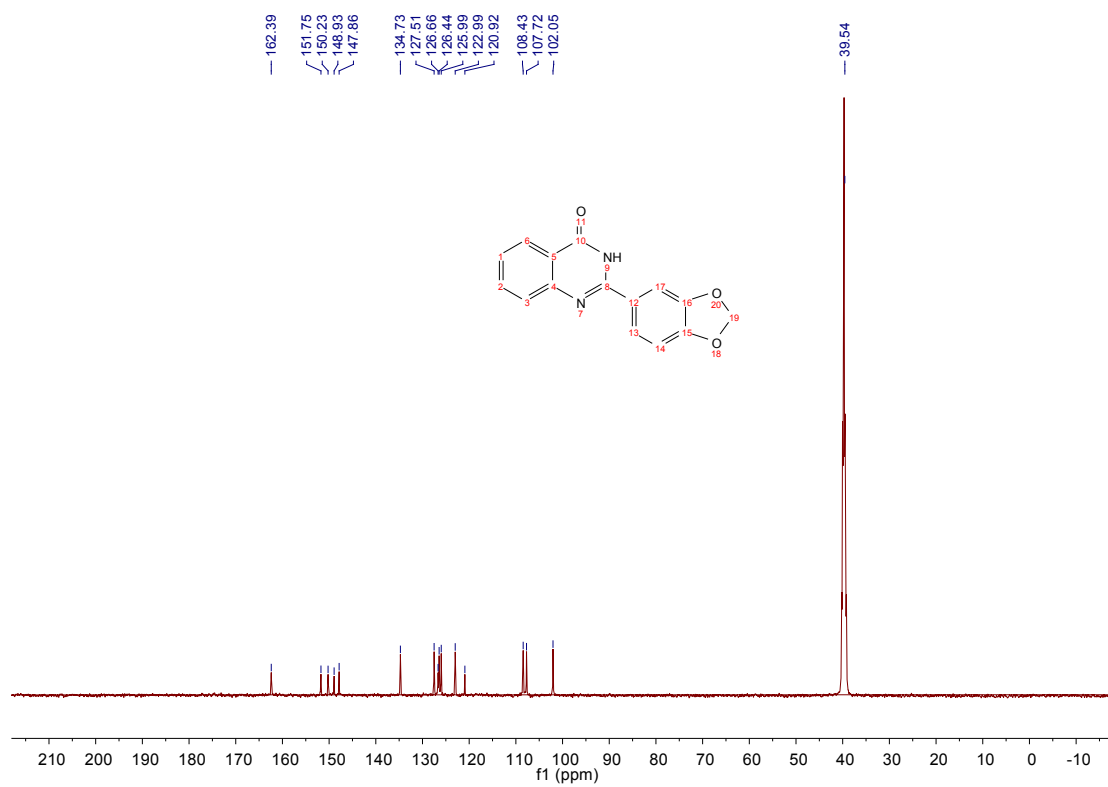

The  $^1\text{H}$  and  $^{13}\text{C}$  NMR spectra of compounds **3as**

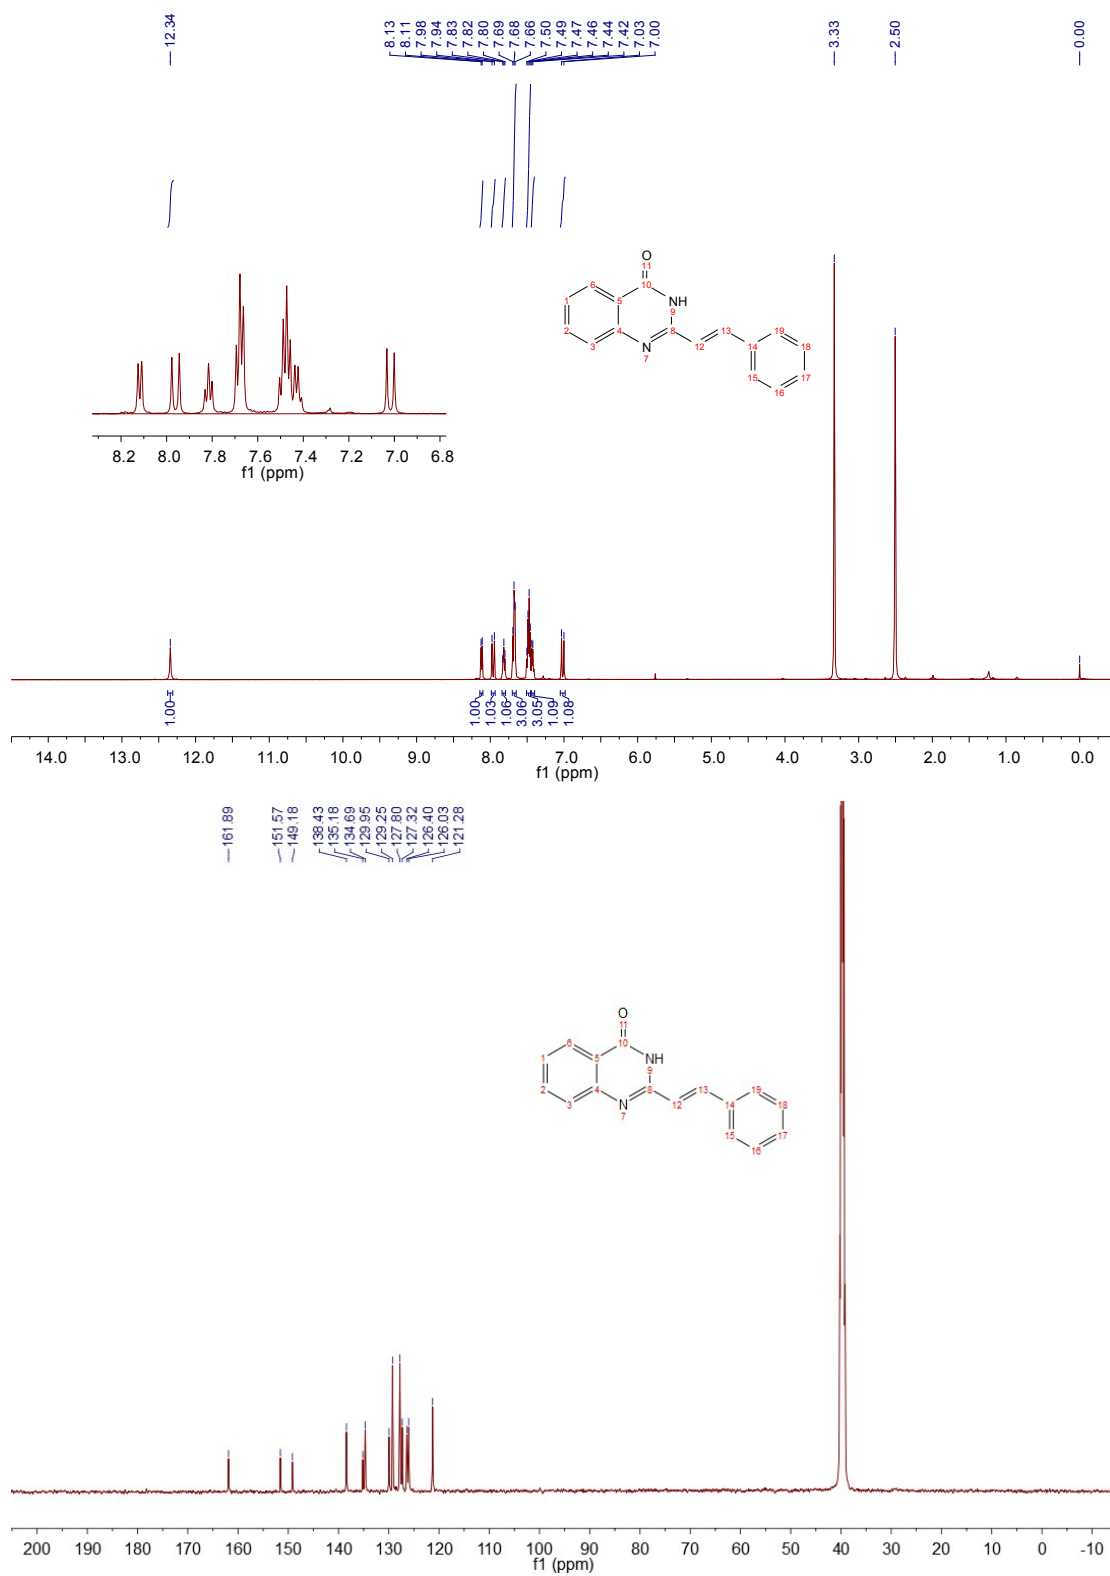

The  $^1\text{H}$  and  $^{13}\text{C}$  NMR spectra of compounds **3at**

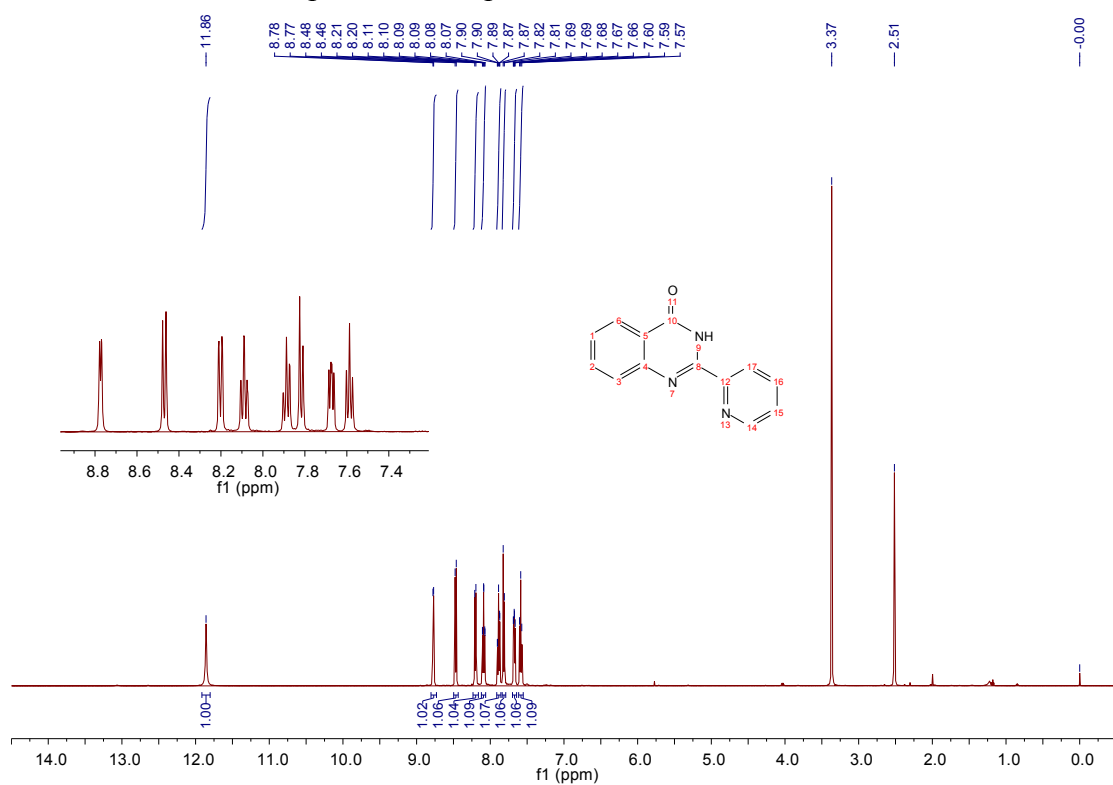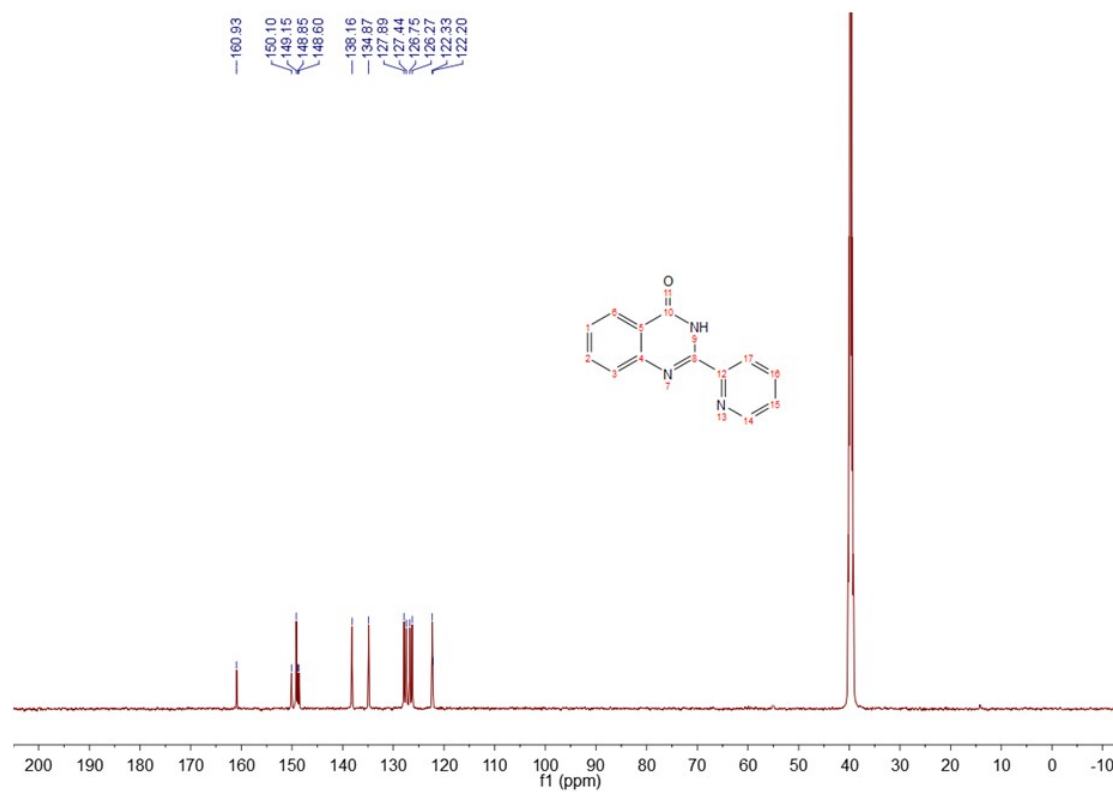

The  $^1\text{H}$  and  $^{13}\text{C}$  NMR spectra of compounds **3au**

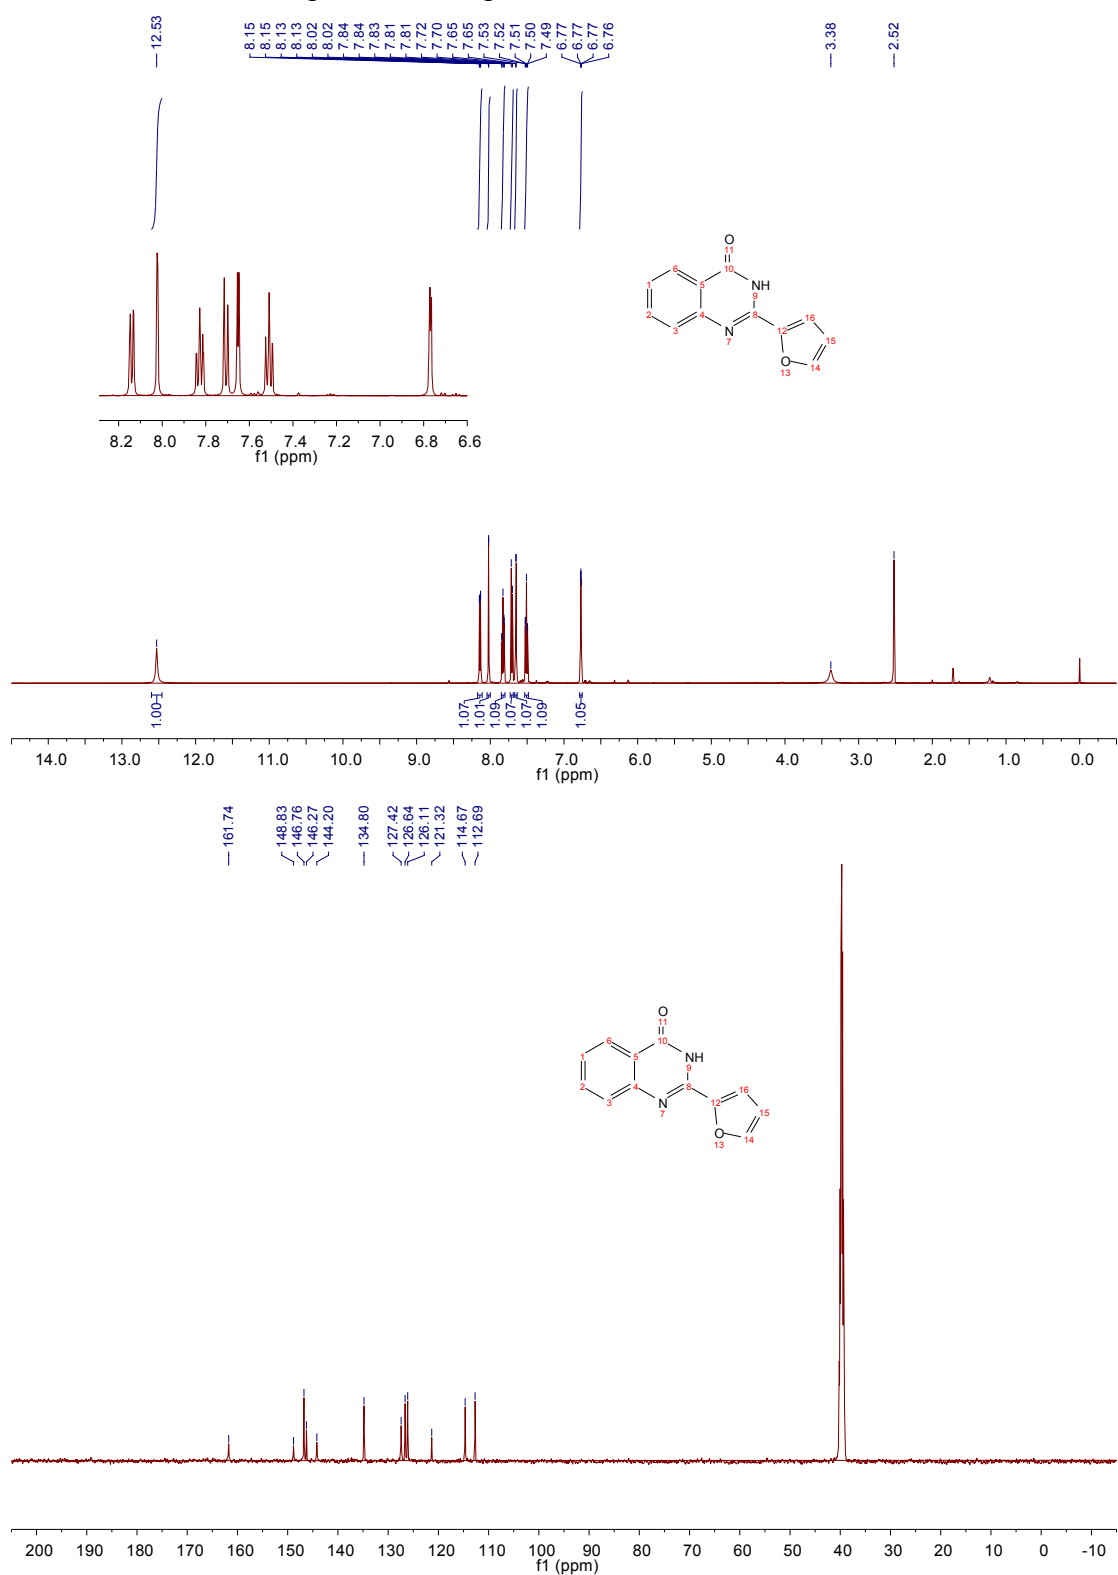

The  $^1\text{H}$  and  $^{13}\text{C}$  NMR spectra of compounds **3av**

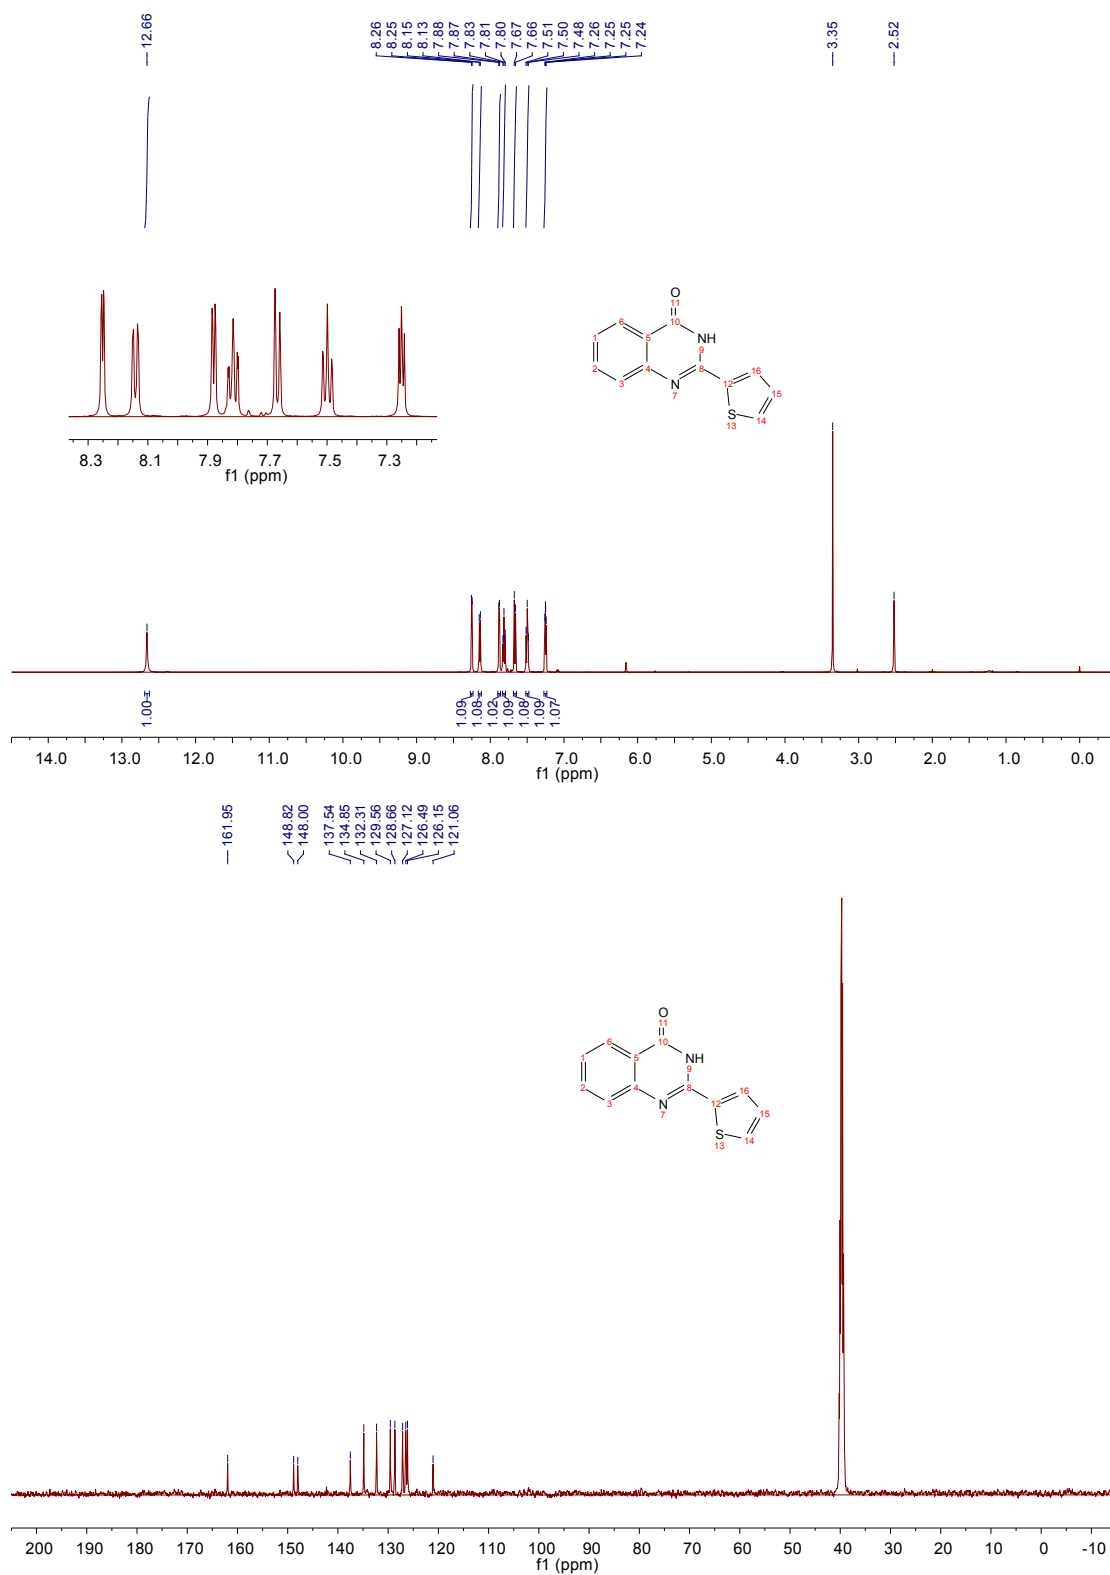

The  $^1\text{H}$  and  $^{13}\text{C}$  NMR spectra of compounds **3aw**

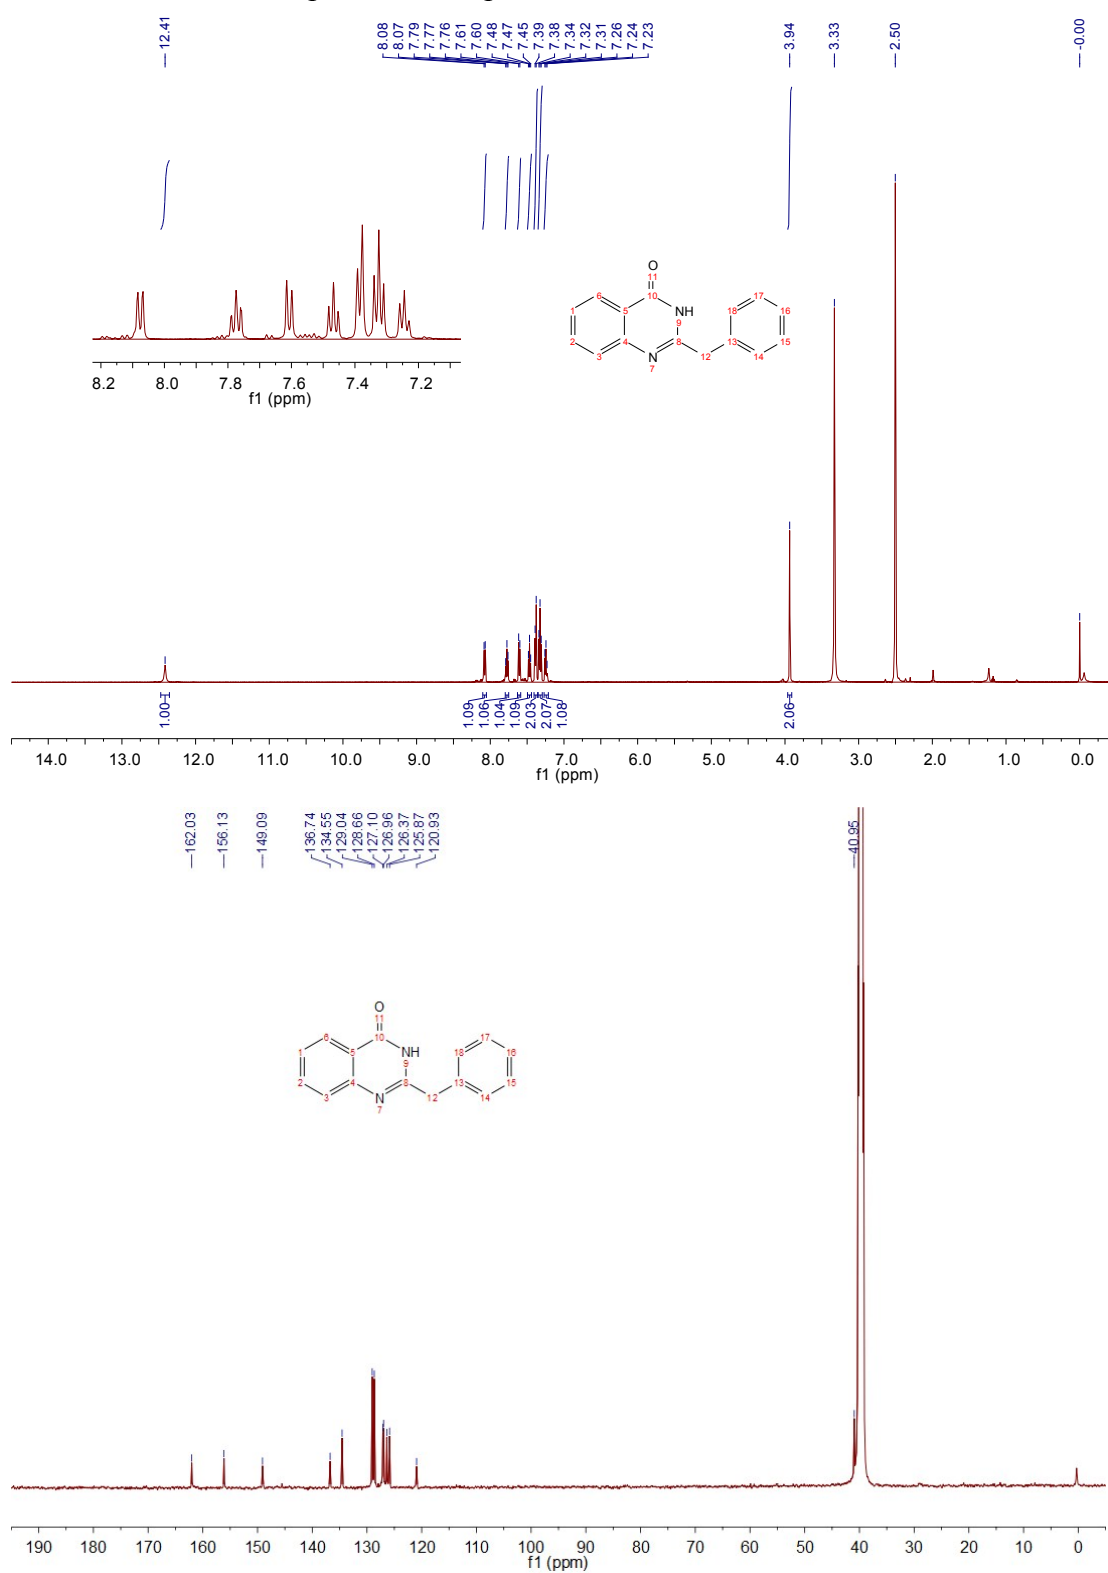



The  $^1\text{H}$  and  $^{13}\text{C}$  NMR spectra of compounds **3ax**

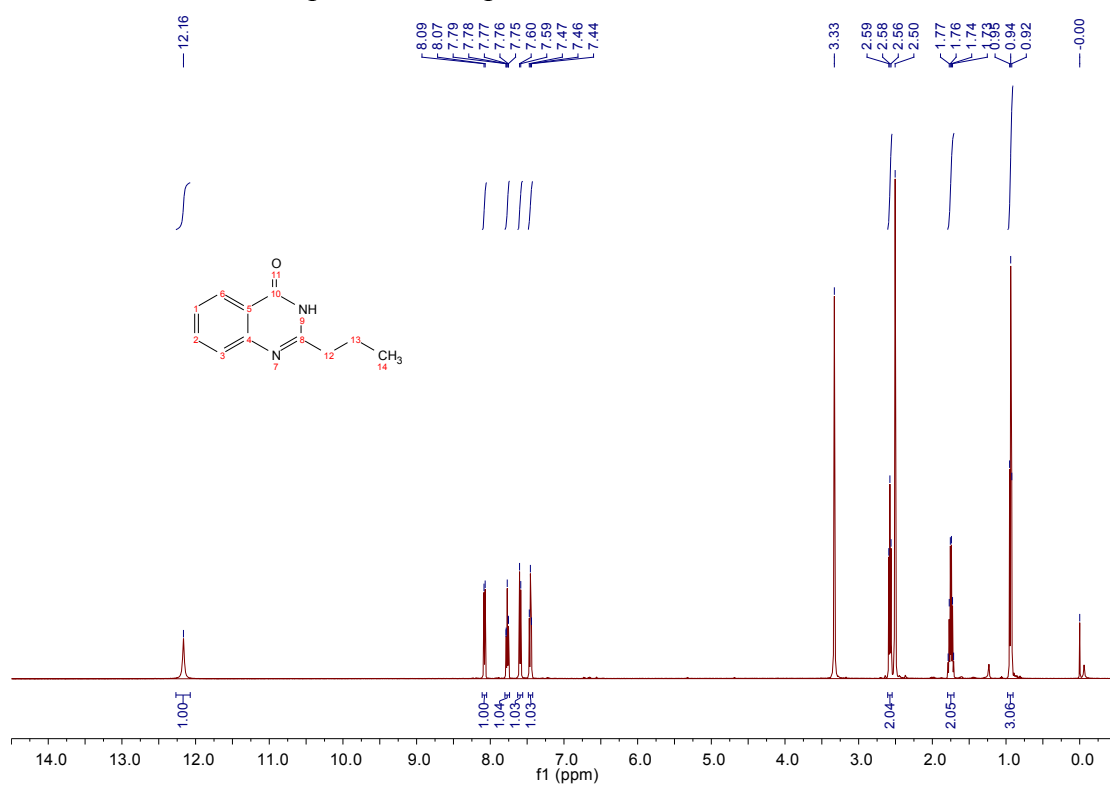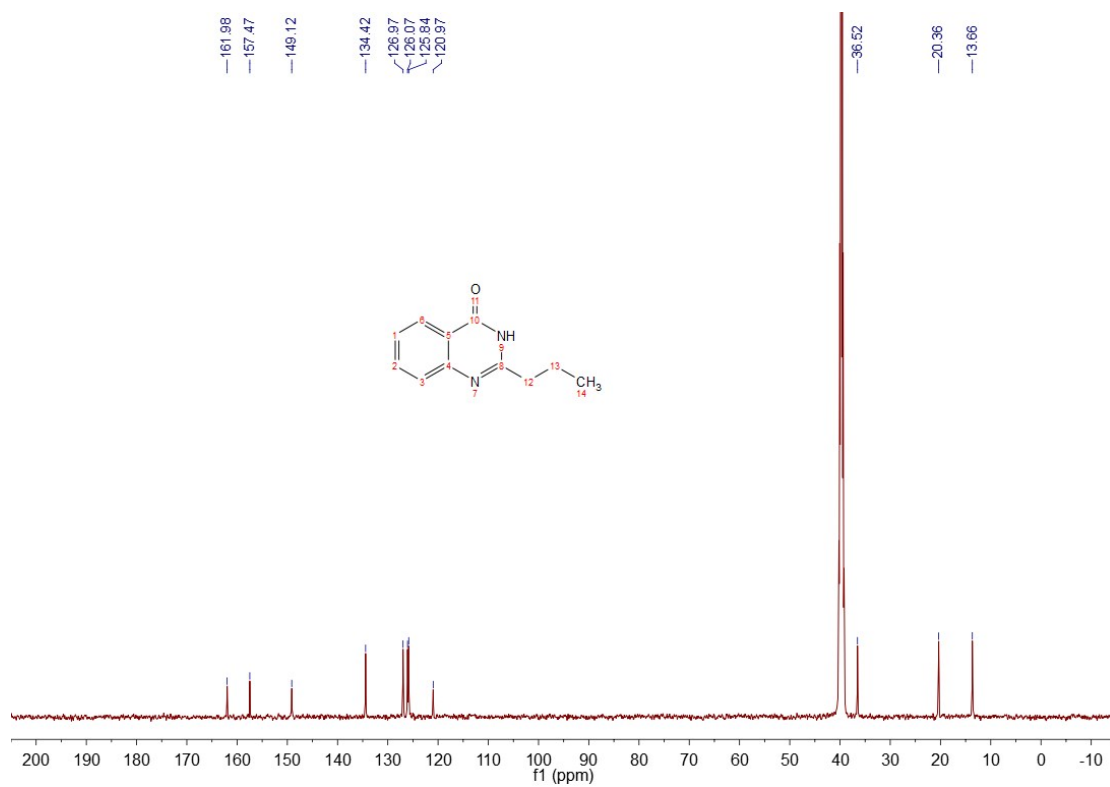

The  $^1\text{H}$  and  $^{13}\text{C}$  NMR spectra of compounds **3ay**

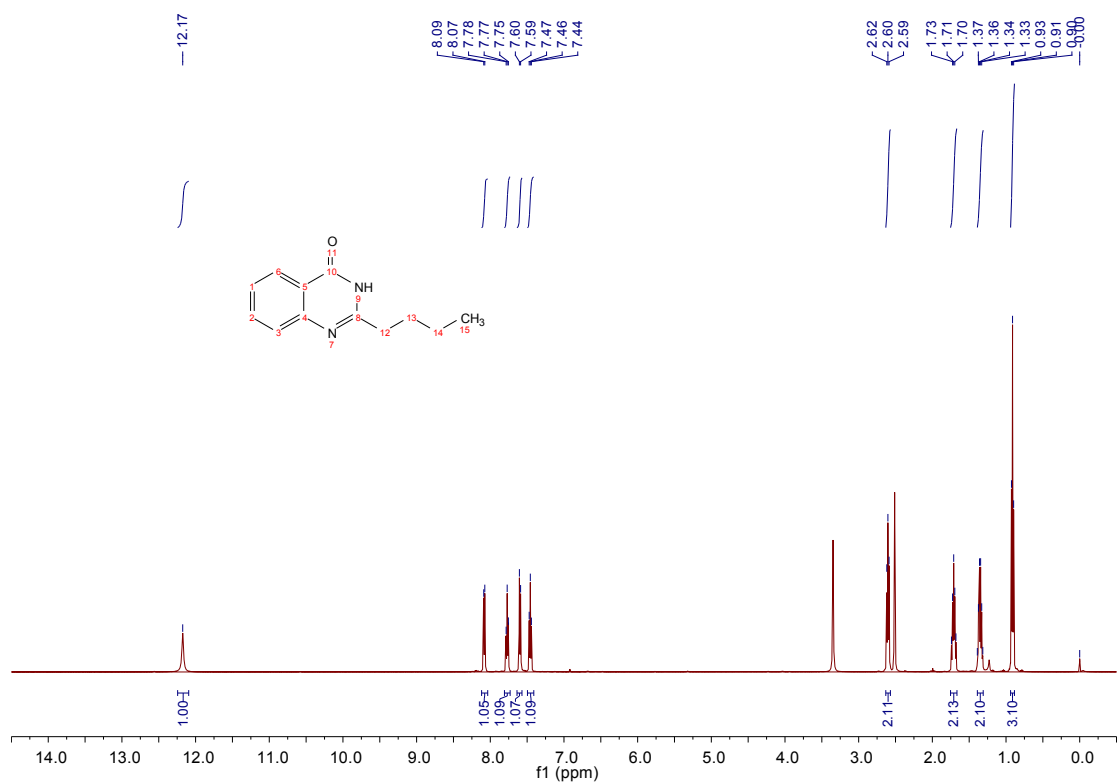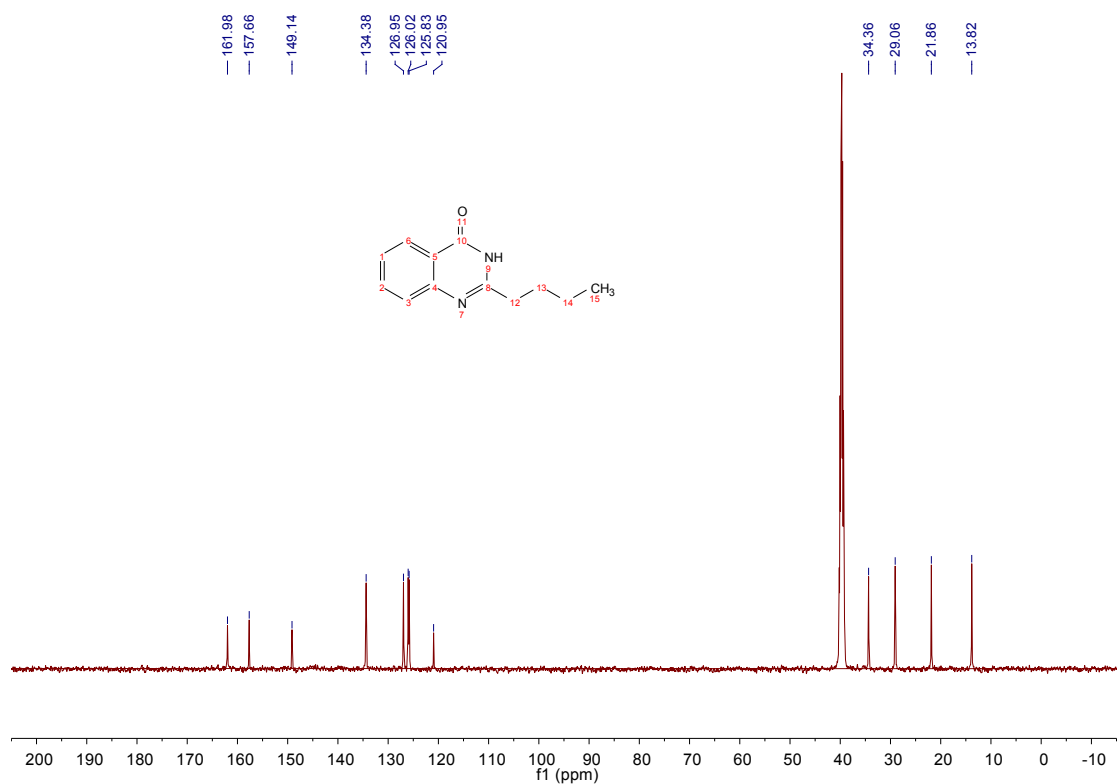

The  $^1\text{H}$  and  $^{13}\text{C}$  NMR spectra of compounds **3ba**

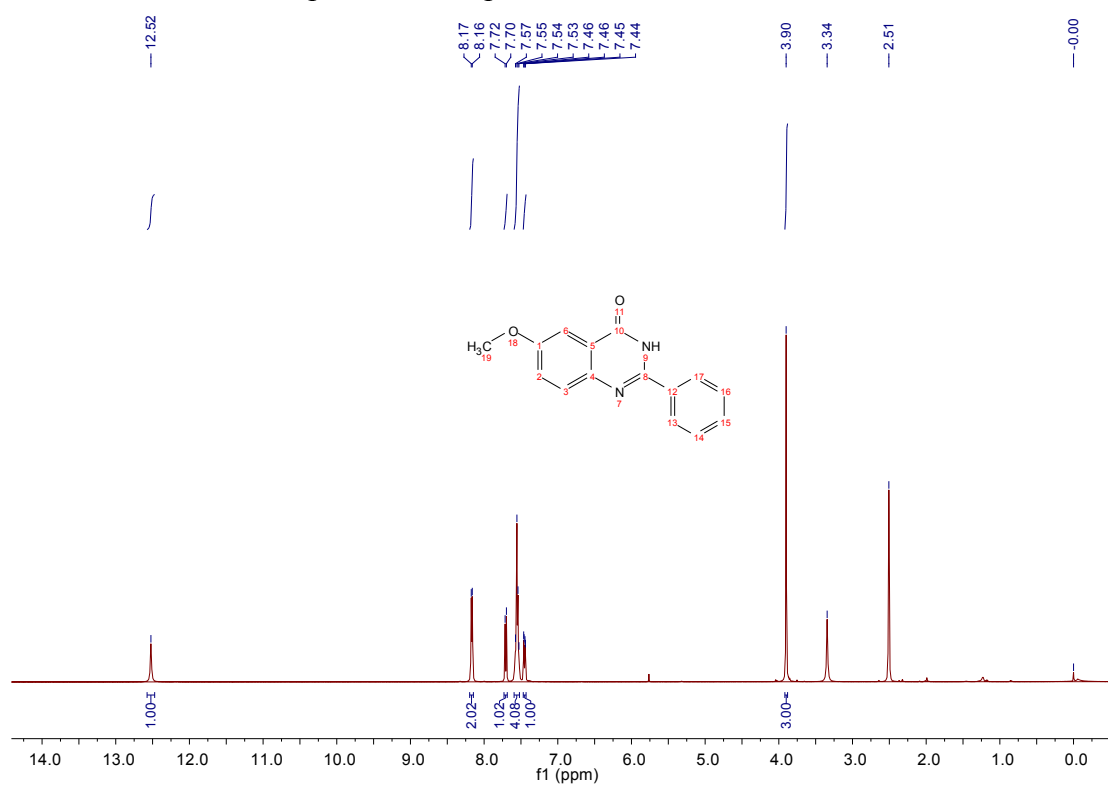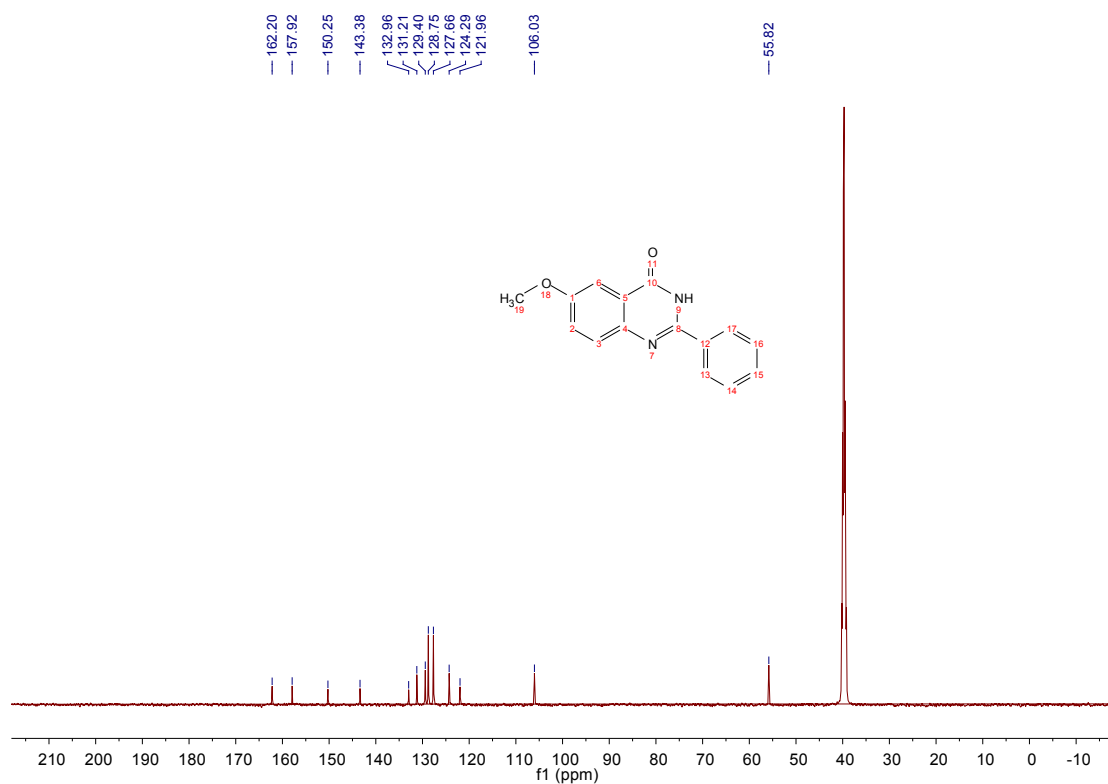

The  $^1\text{H}$  and  $^{13}\text{C}$  NMR spectra of compounds **3ca**

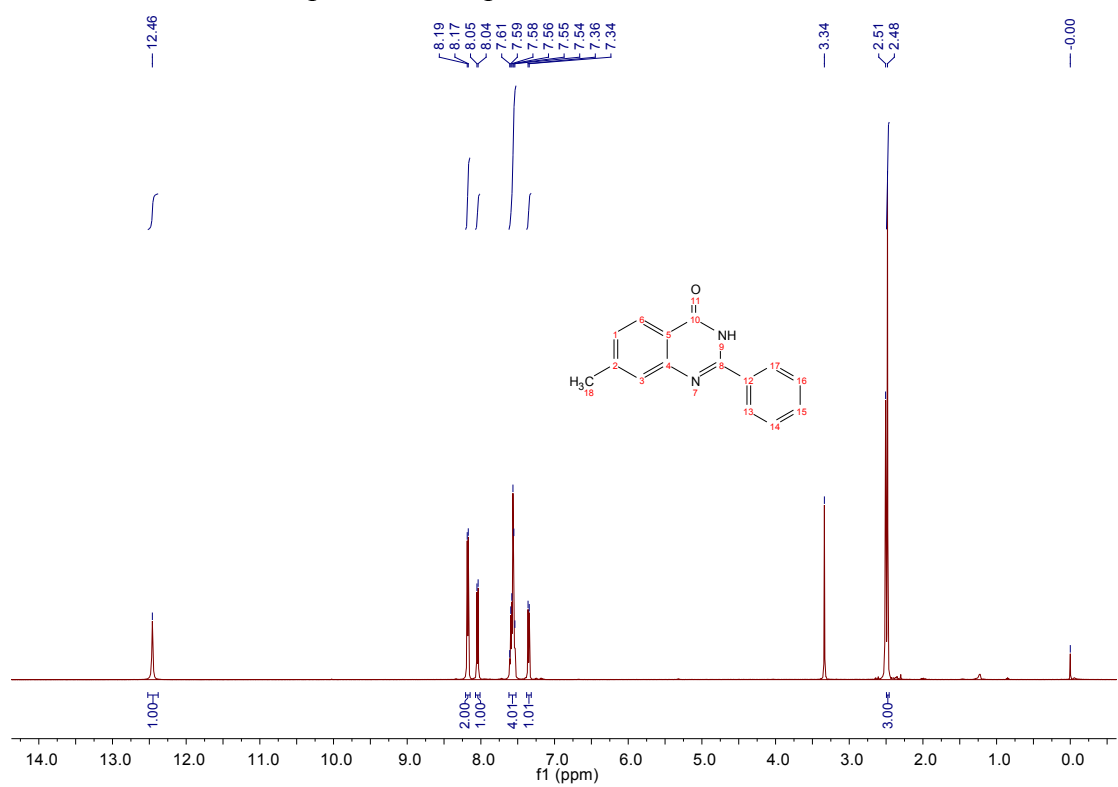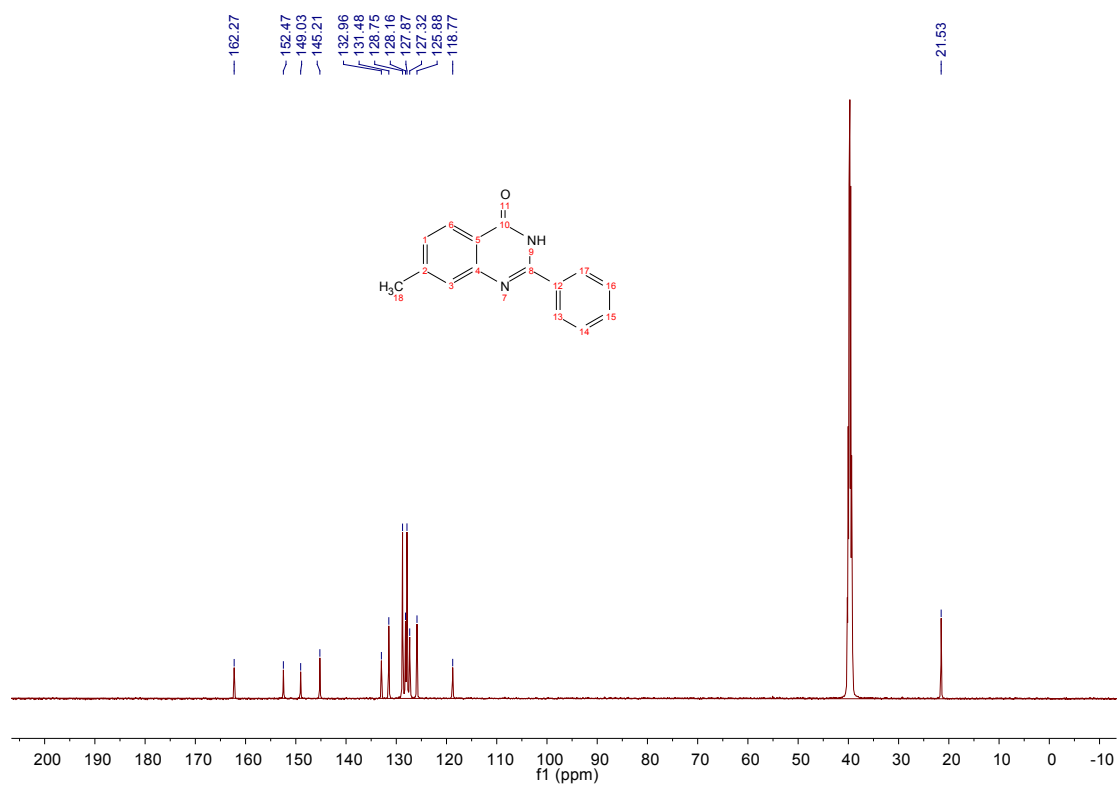

The  $^1\text{H}$  and  $^{13}\text{C}$  NMR spectra of compounds **3da**

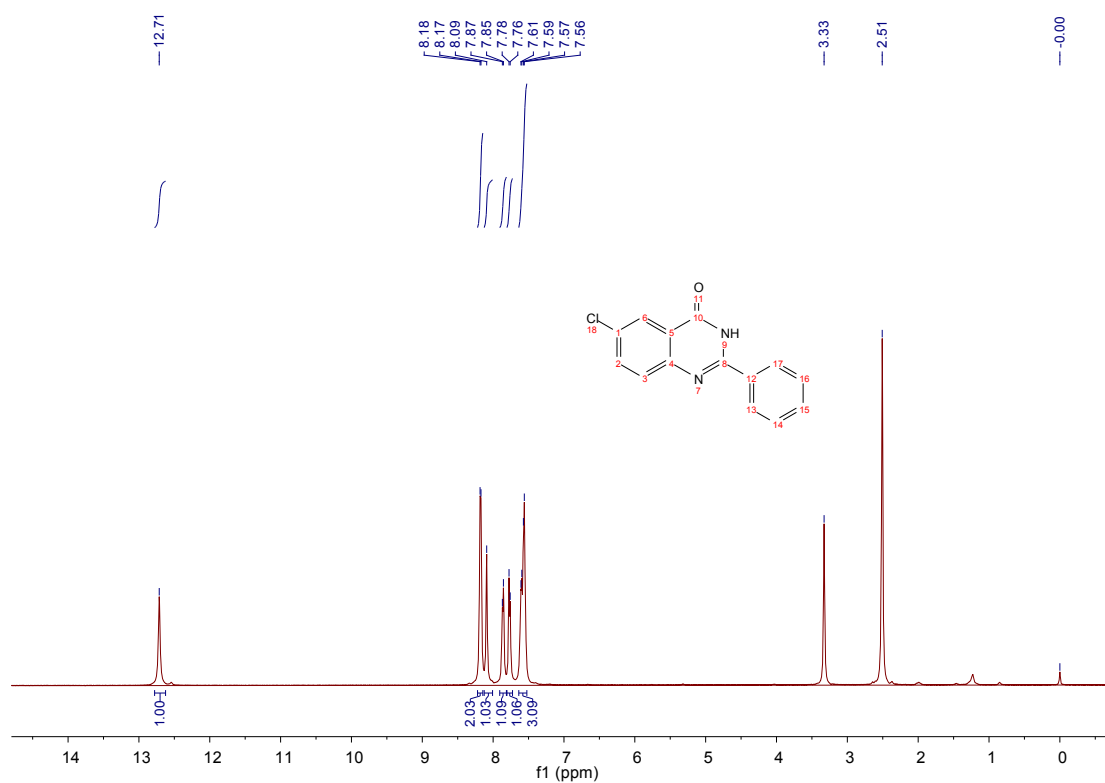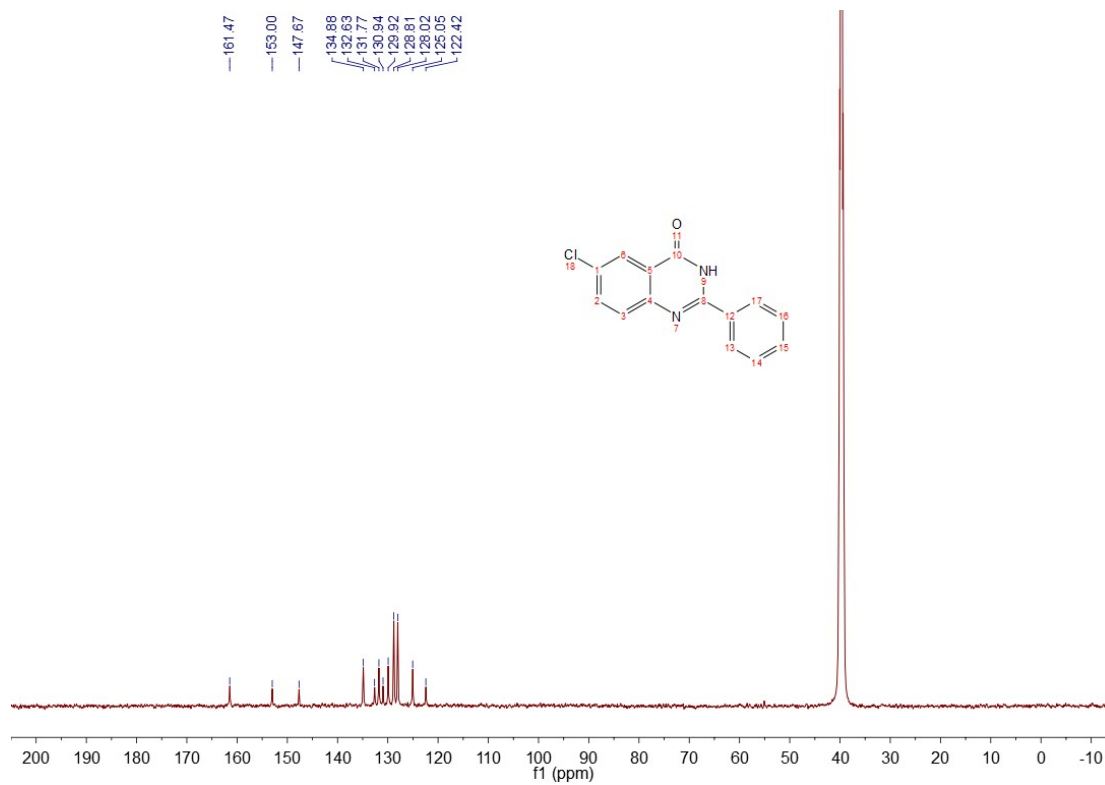

The  $^1\text{H}$  and  $^{13}\text{C}$  NMR spectra of compounds **3ea**

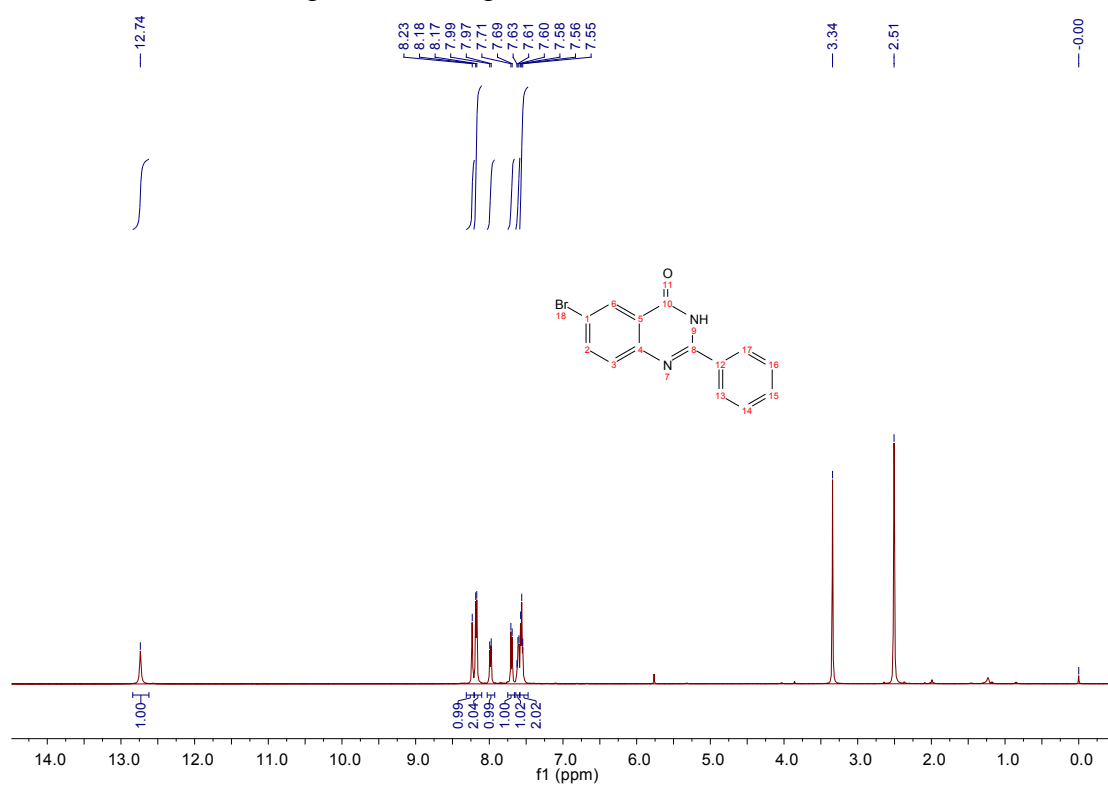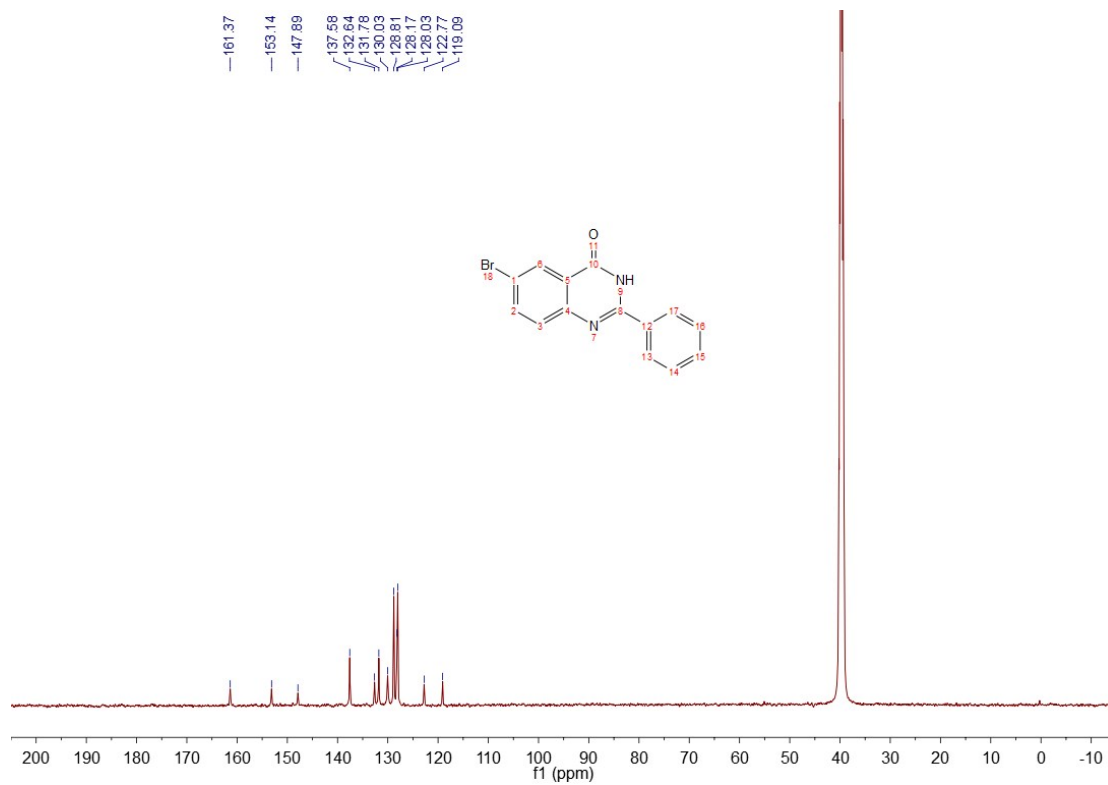

The  $^1\text{H}$  and  $^{13}\text{C}$  NMR spectra of compounds **3fa**

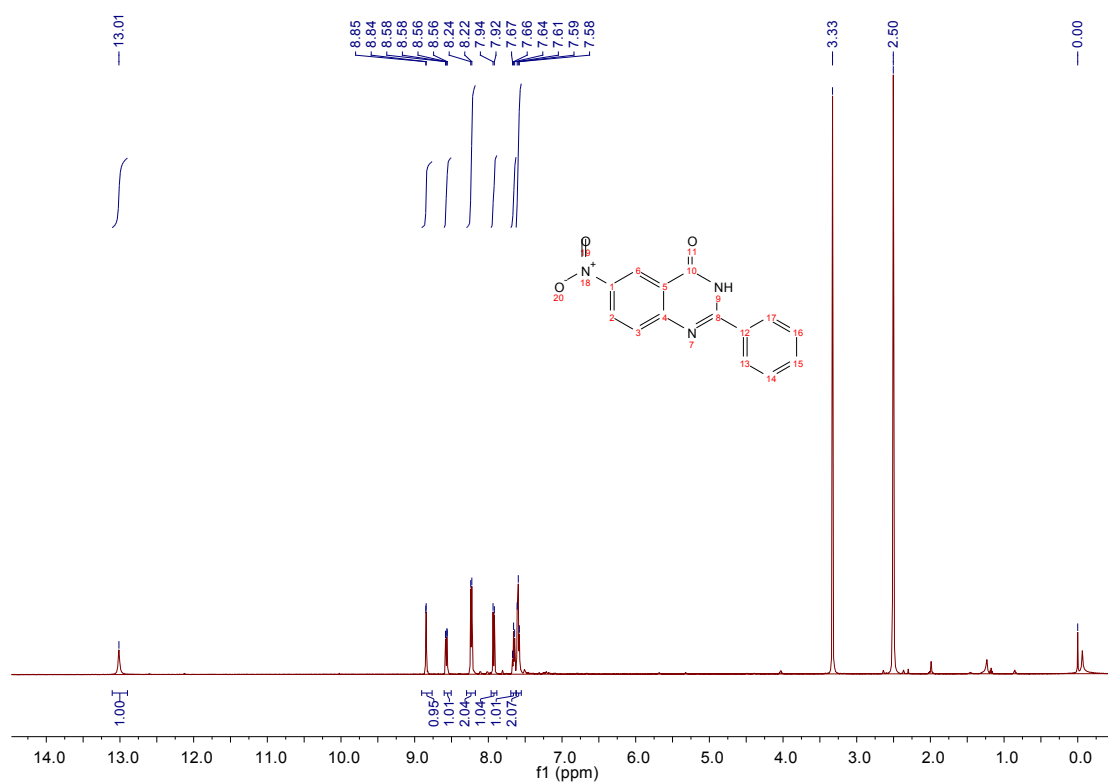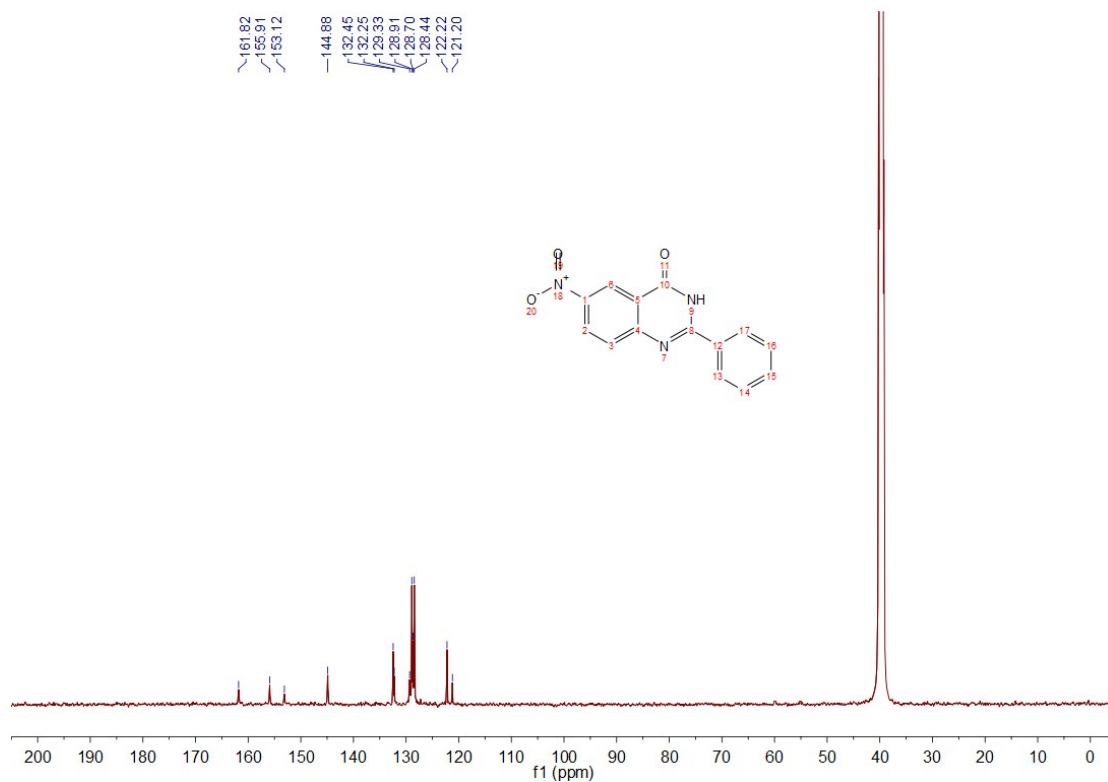

The  $^1\text{H}$  and  $^{13}\text{C}$  NMR spectra of compounds **3ga**

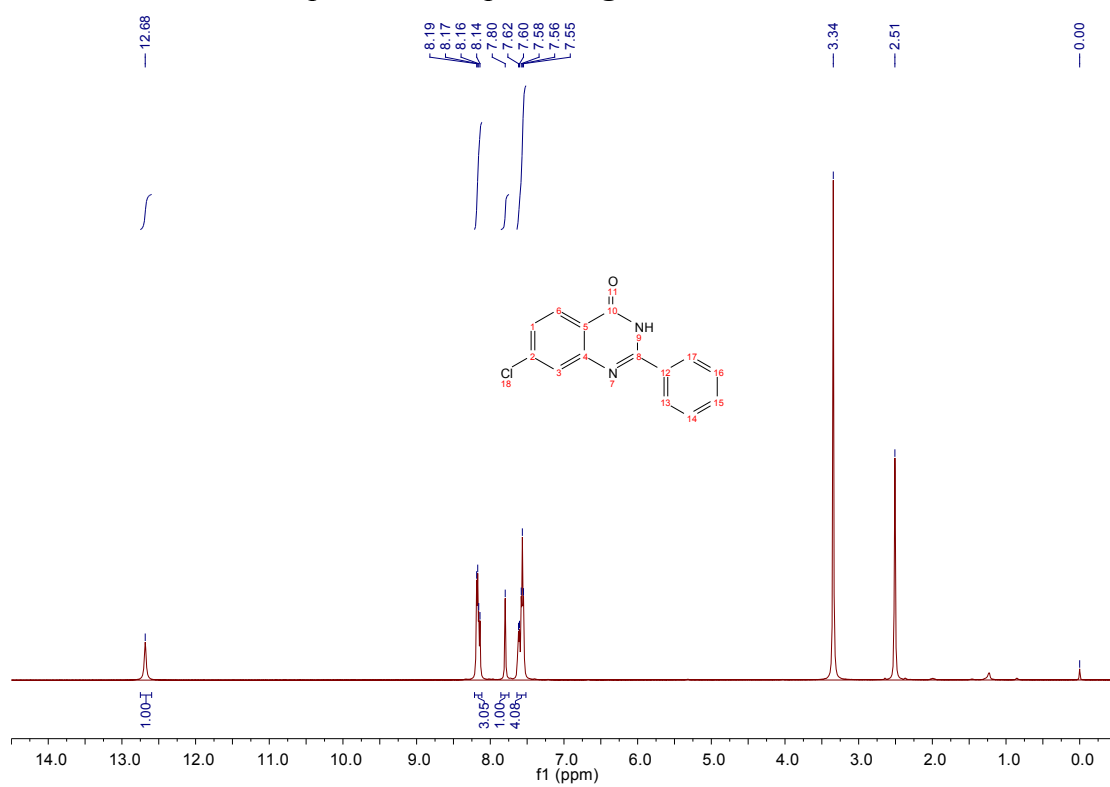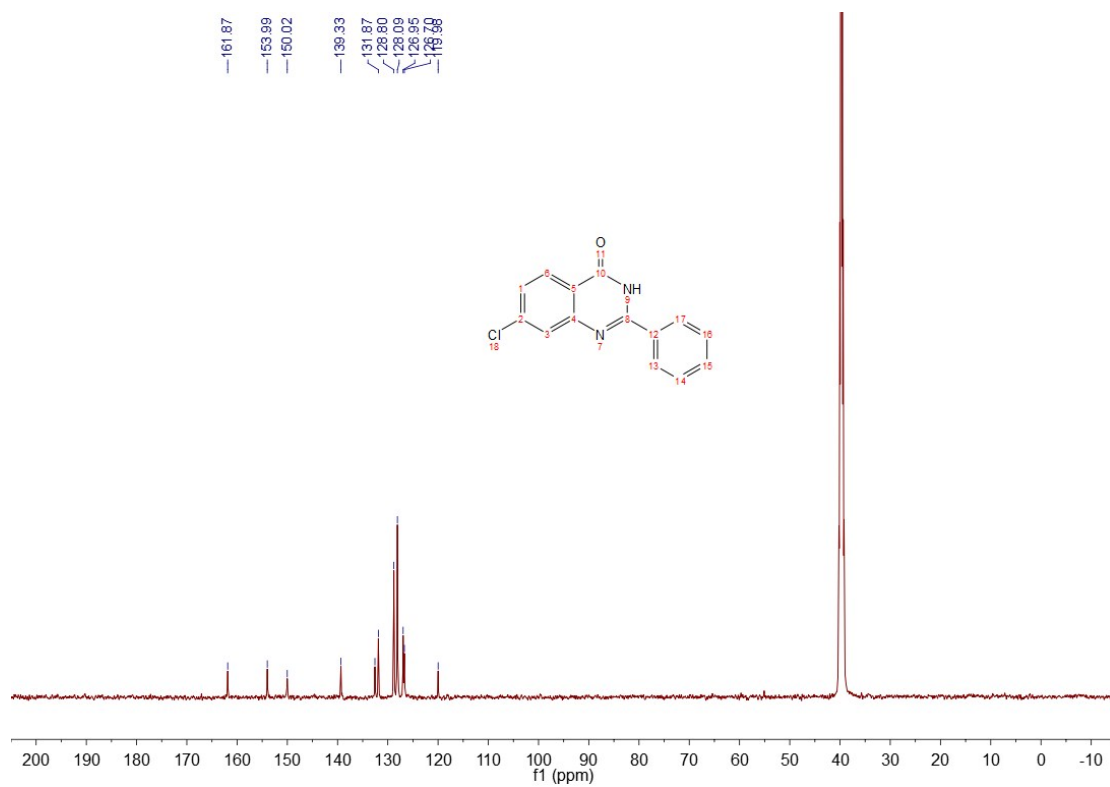



The  $^1\text{H}$  and  $^{13}\text{C}$  NMR spectra of compounds **3cu**

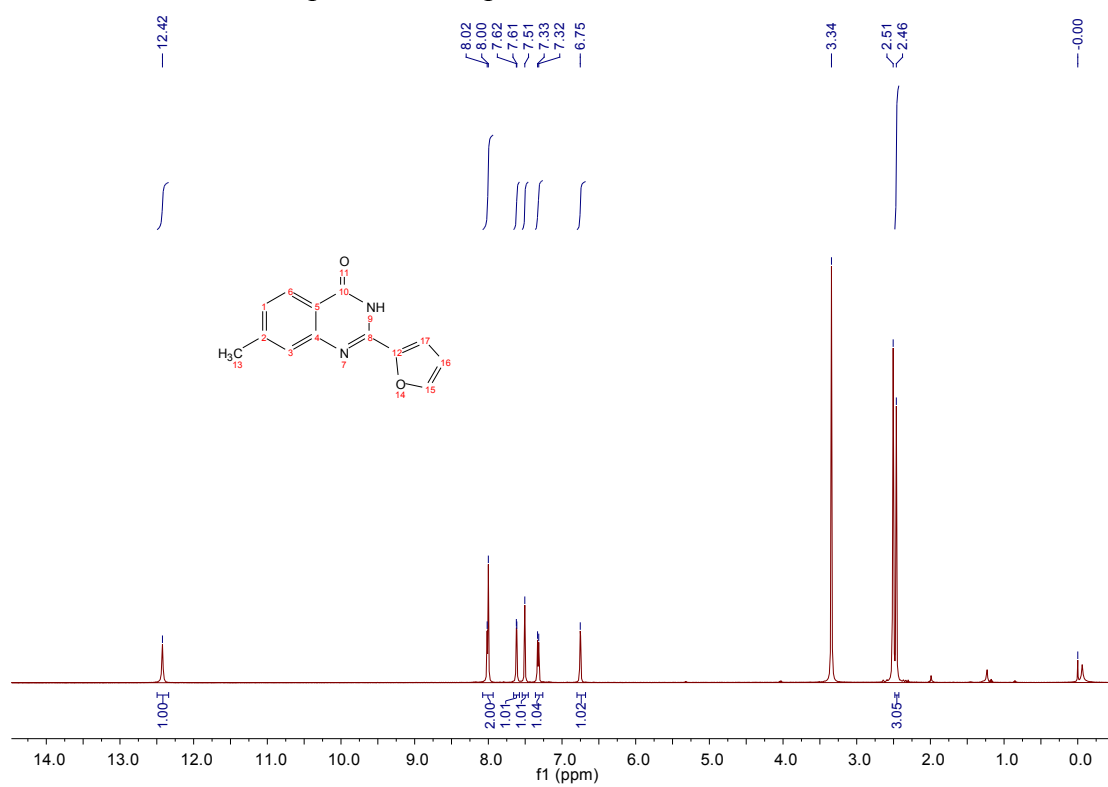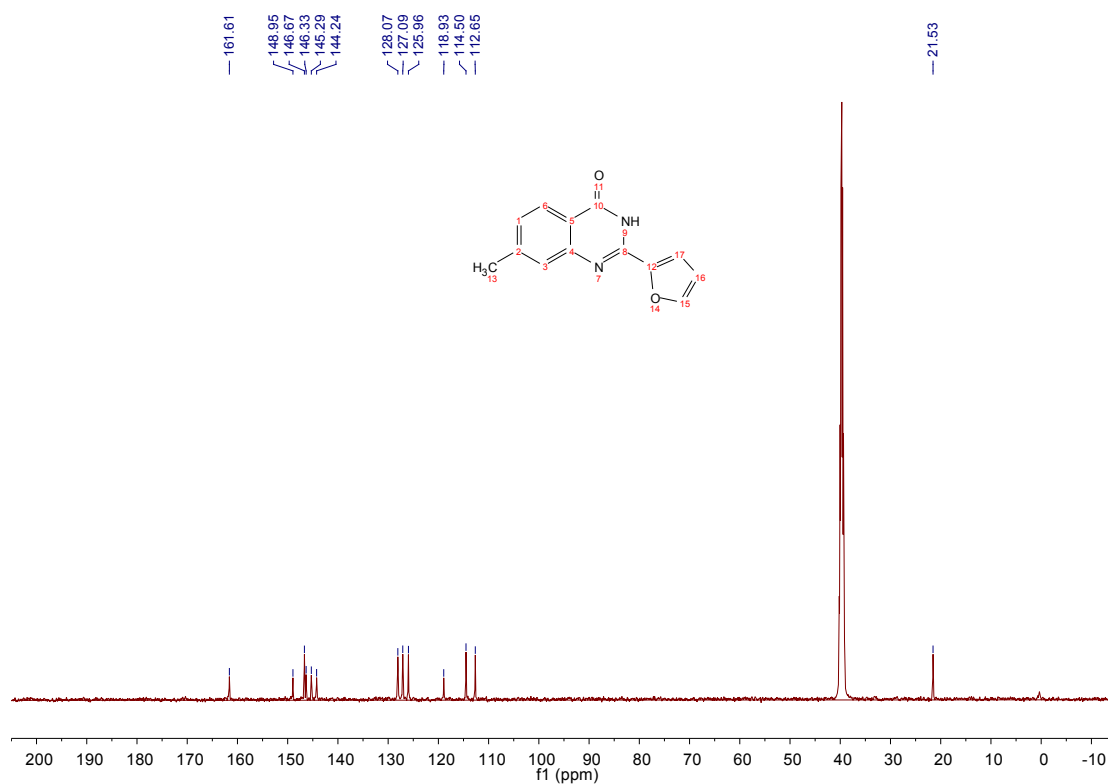

The  $^1\text{H}$  and  $^{13}\text{C}$  NMR spectra of compounds **3du**

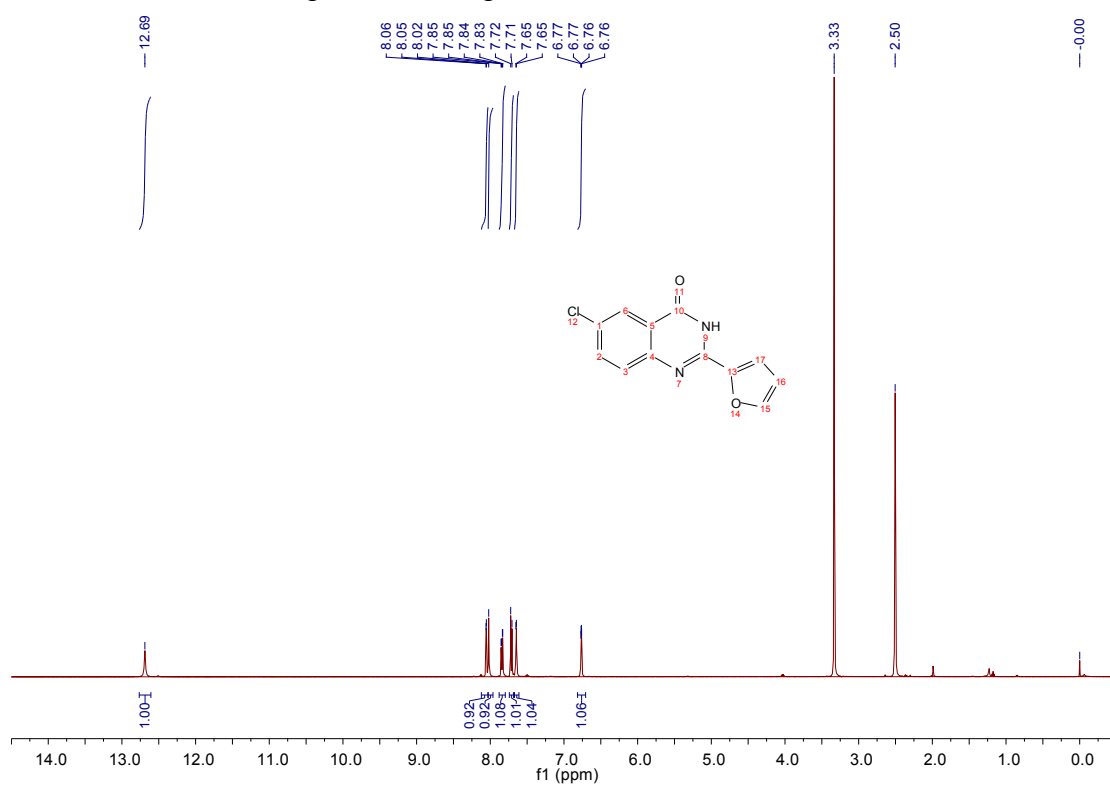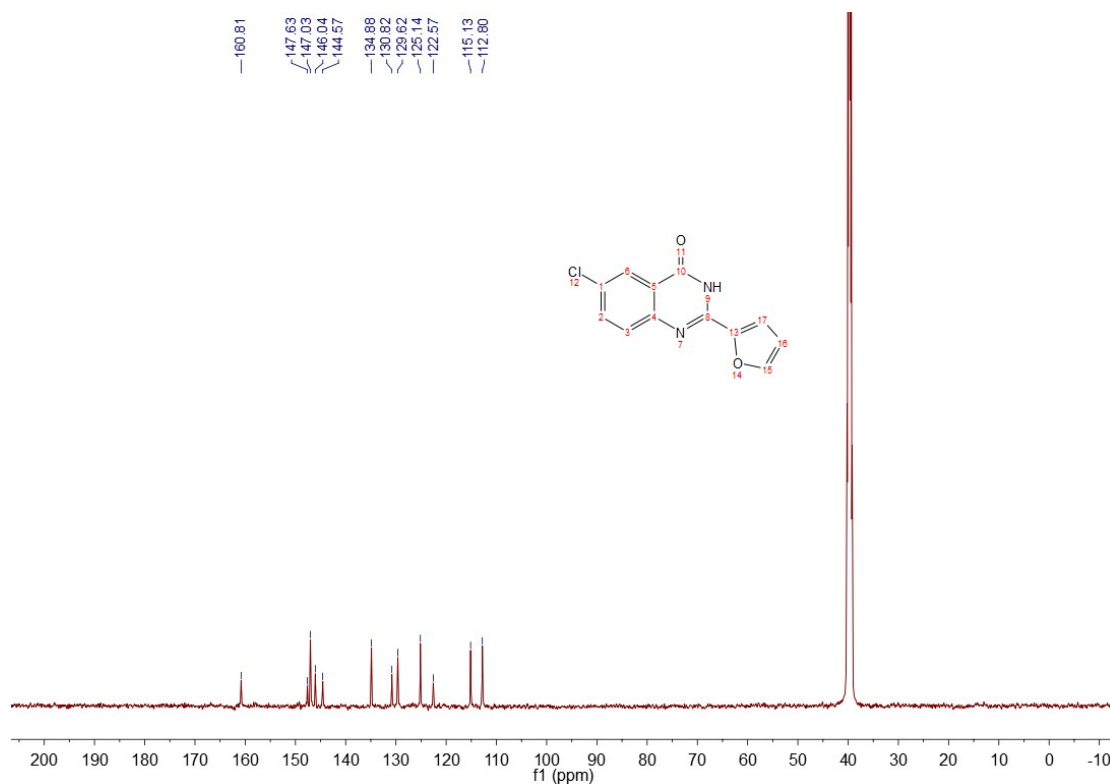

The  $^1\text{H}$  and  $^{13}\text{C}$  NMR spectra of compounds **3gu**

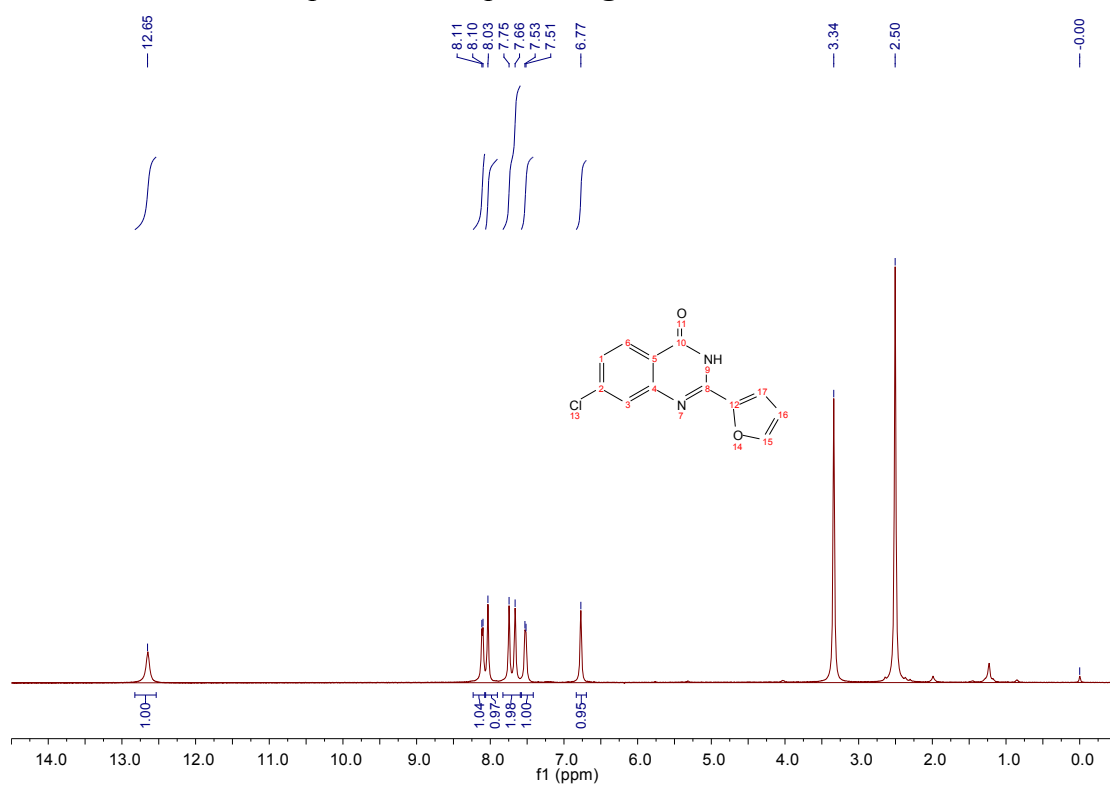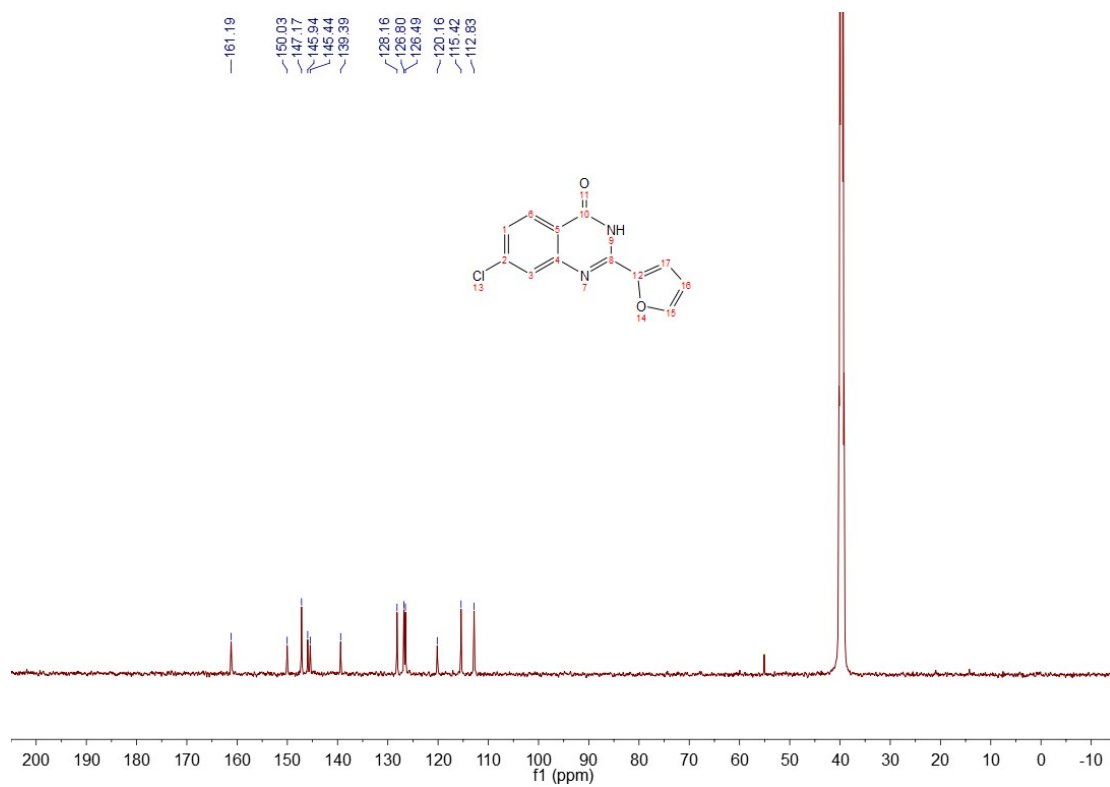

The  $^1\text{H}$  and  $^{13}\text{C}$  NMR spectra of compounds **3ha**

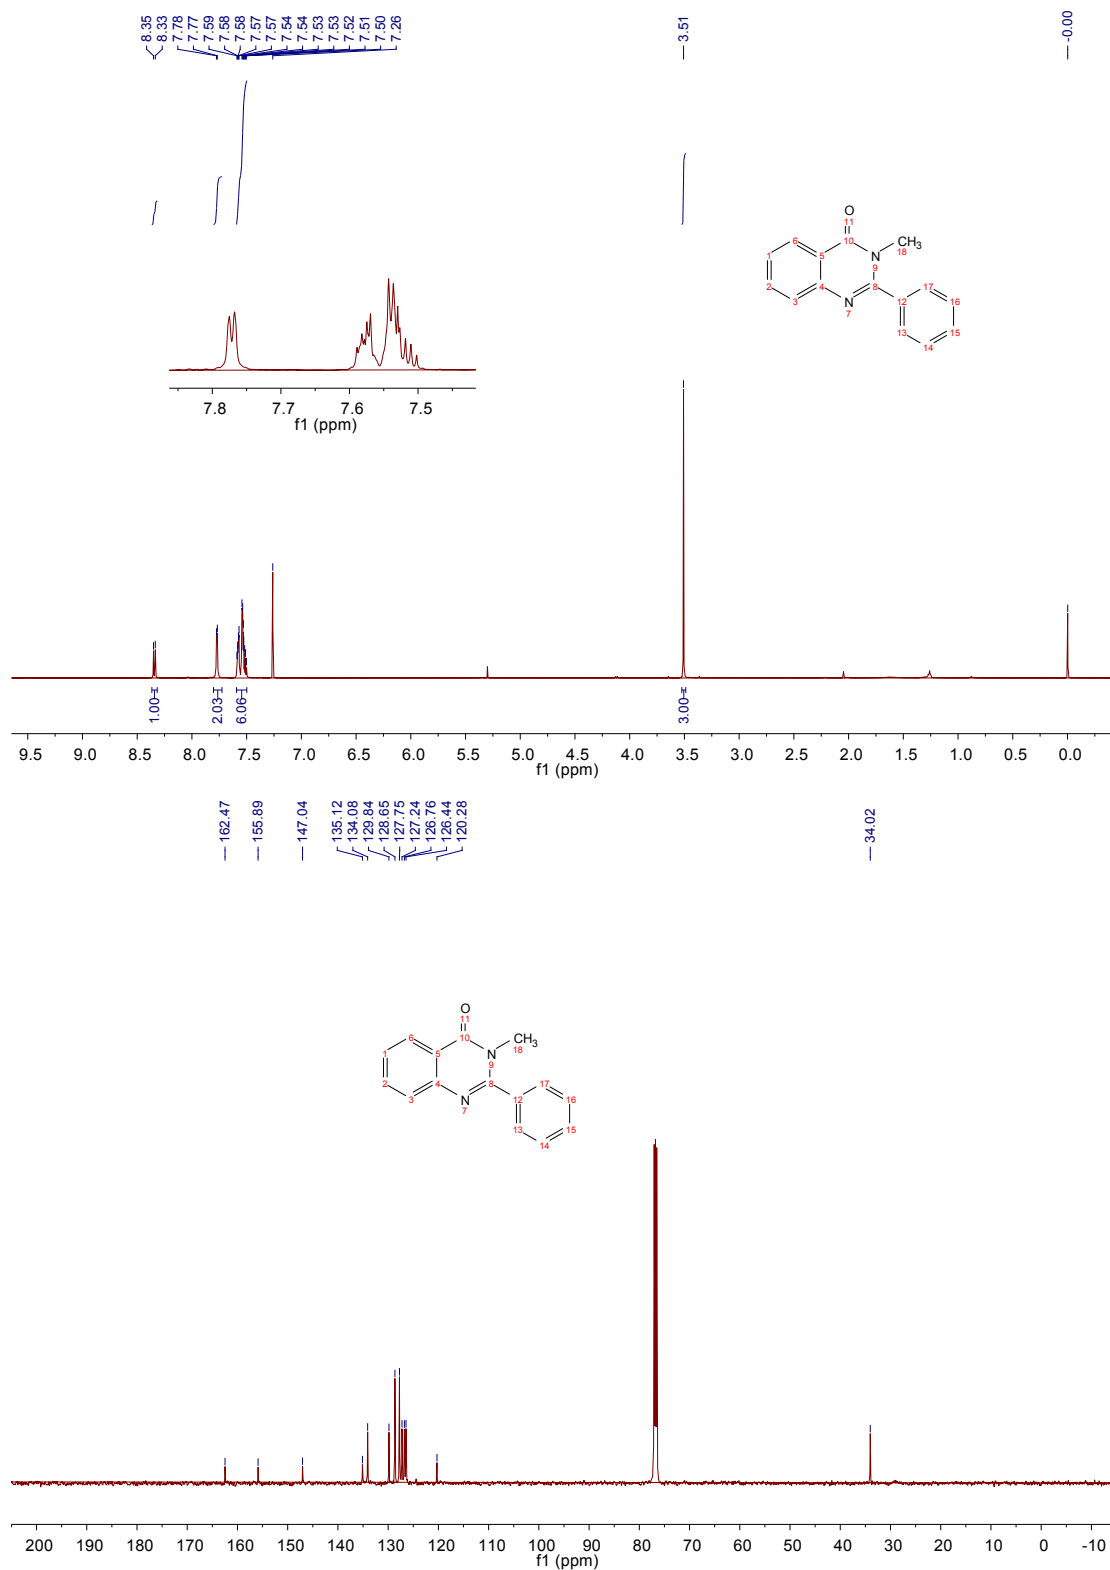

The  $^1\text{H}$  and  $^{13}\text{C}$  NMR spectra of compounds **3he**

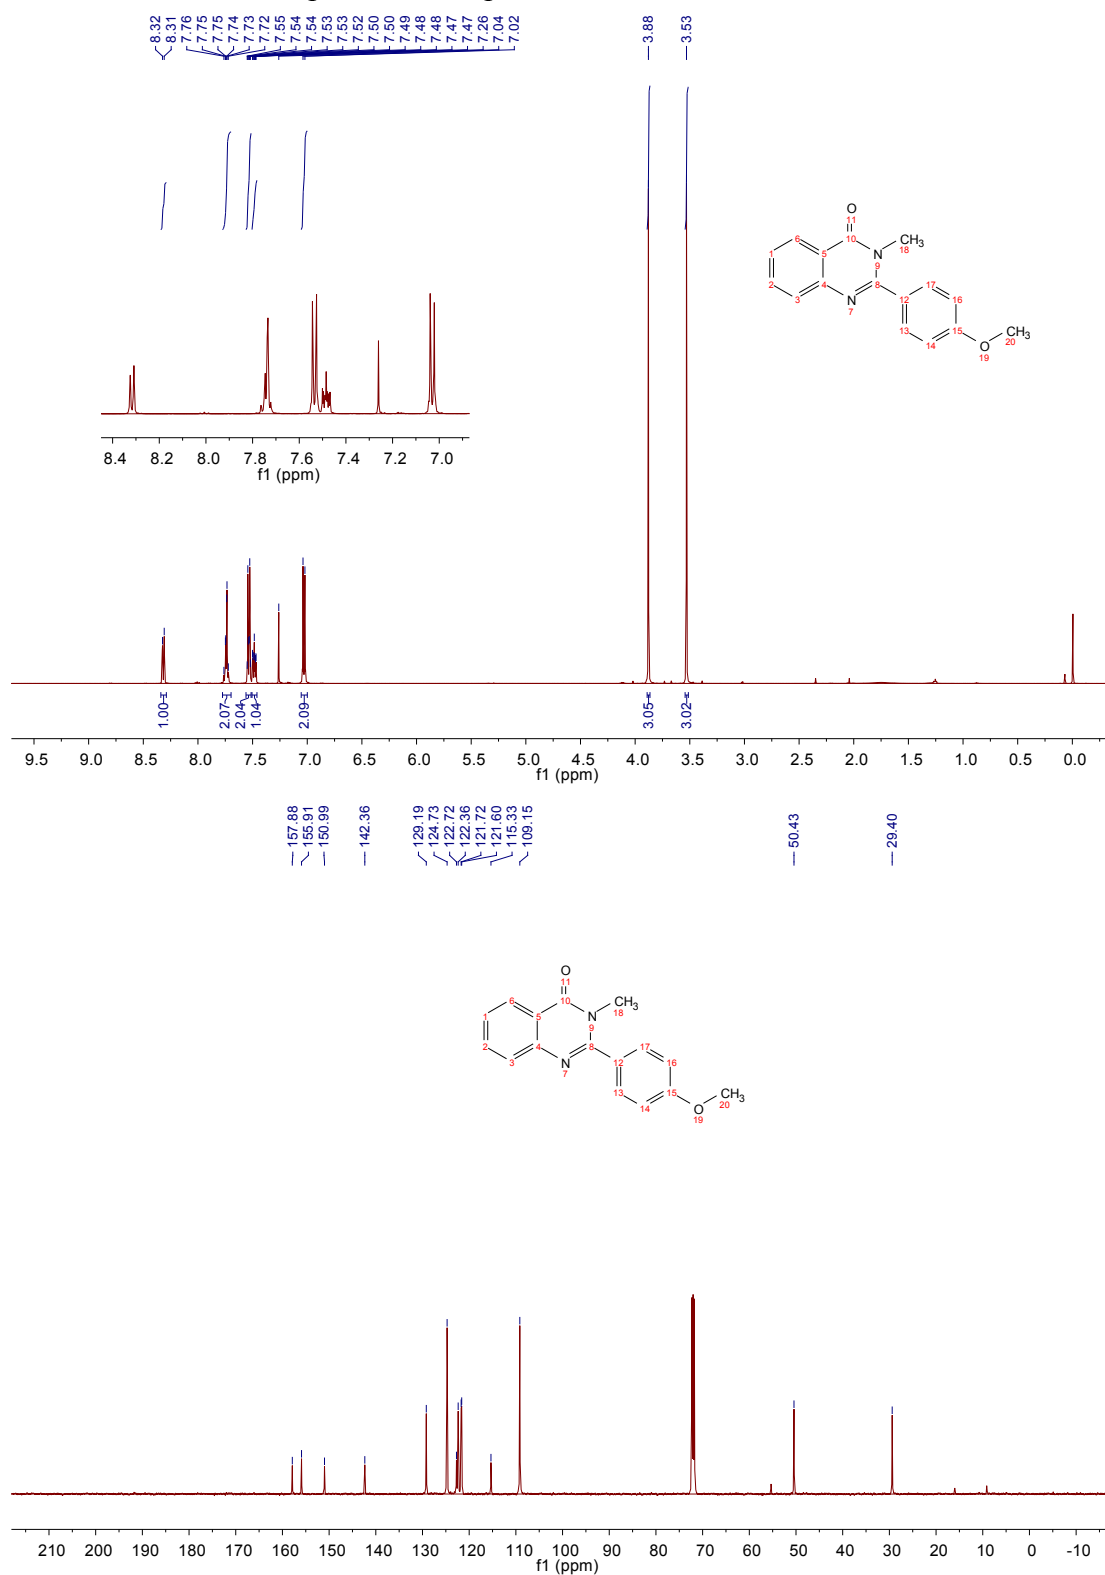

The  $^1\text{H}$  and  $^{13}\text{C}$  NMR spectra of compounds **3hi**

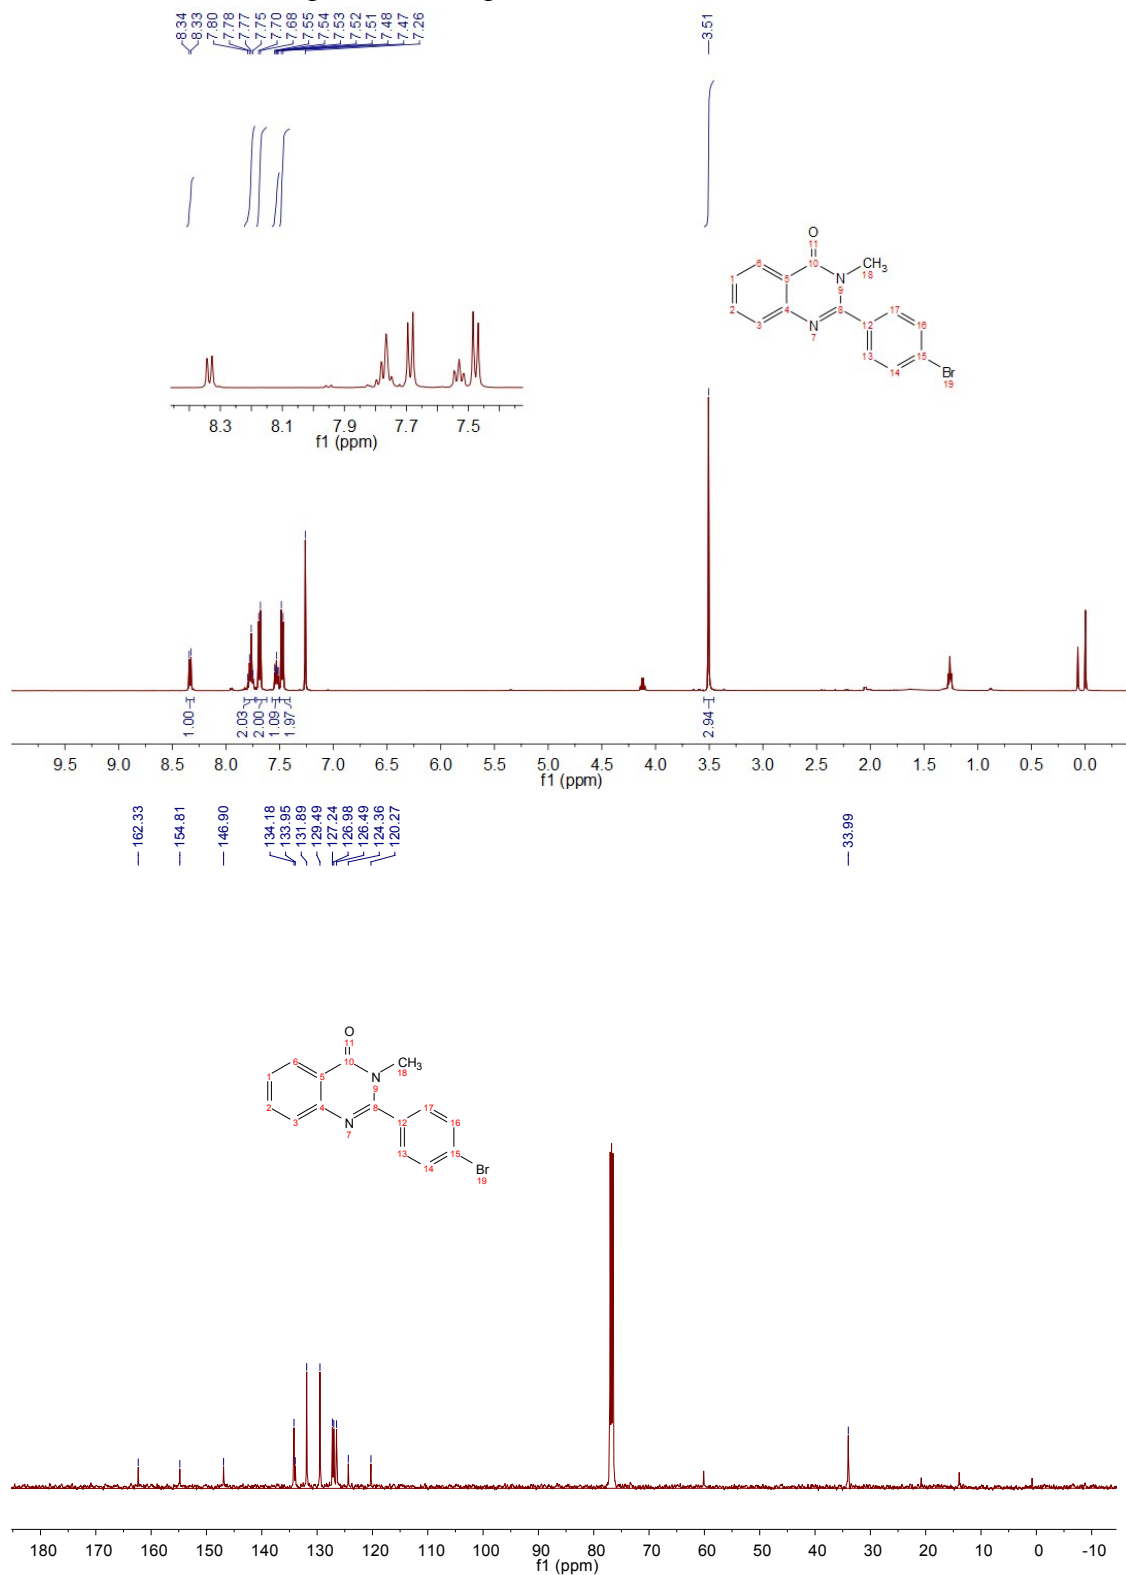

The  $^1\text{H}$  and  $^{13}\text{C}$  NMR spectra of compounds **3ia**

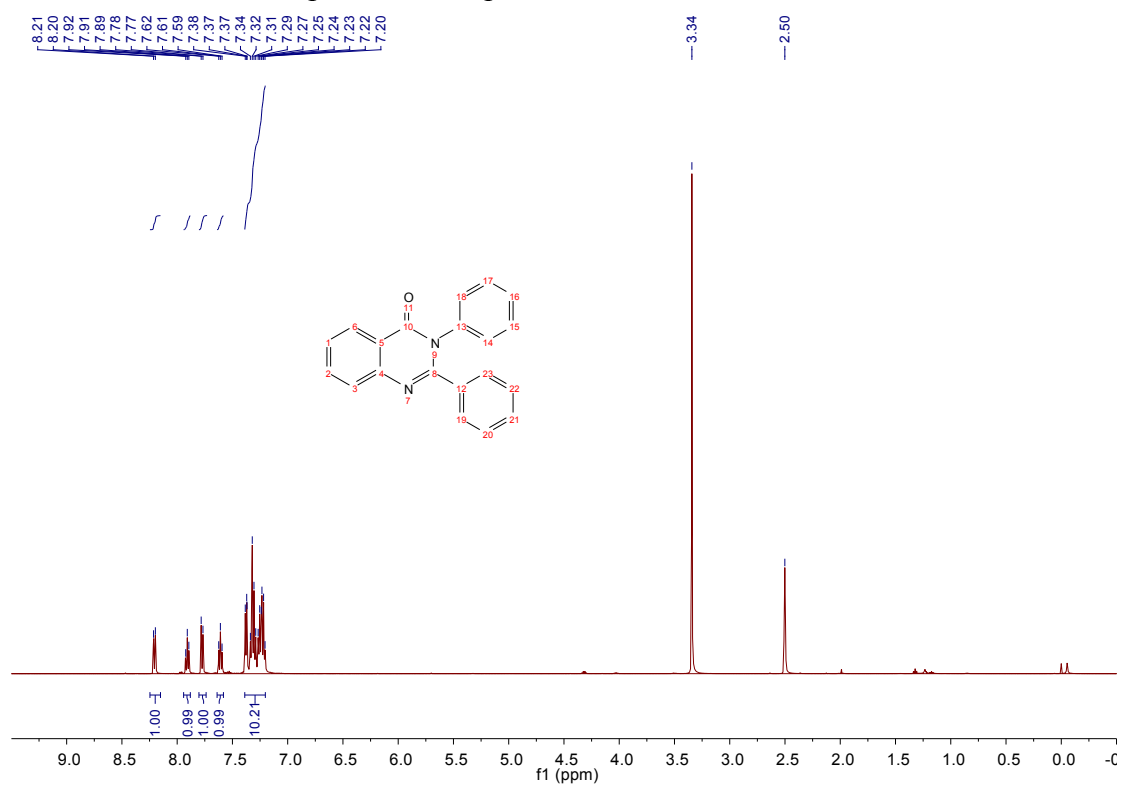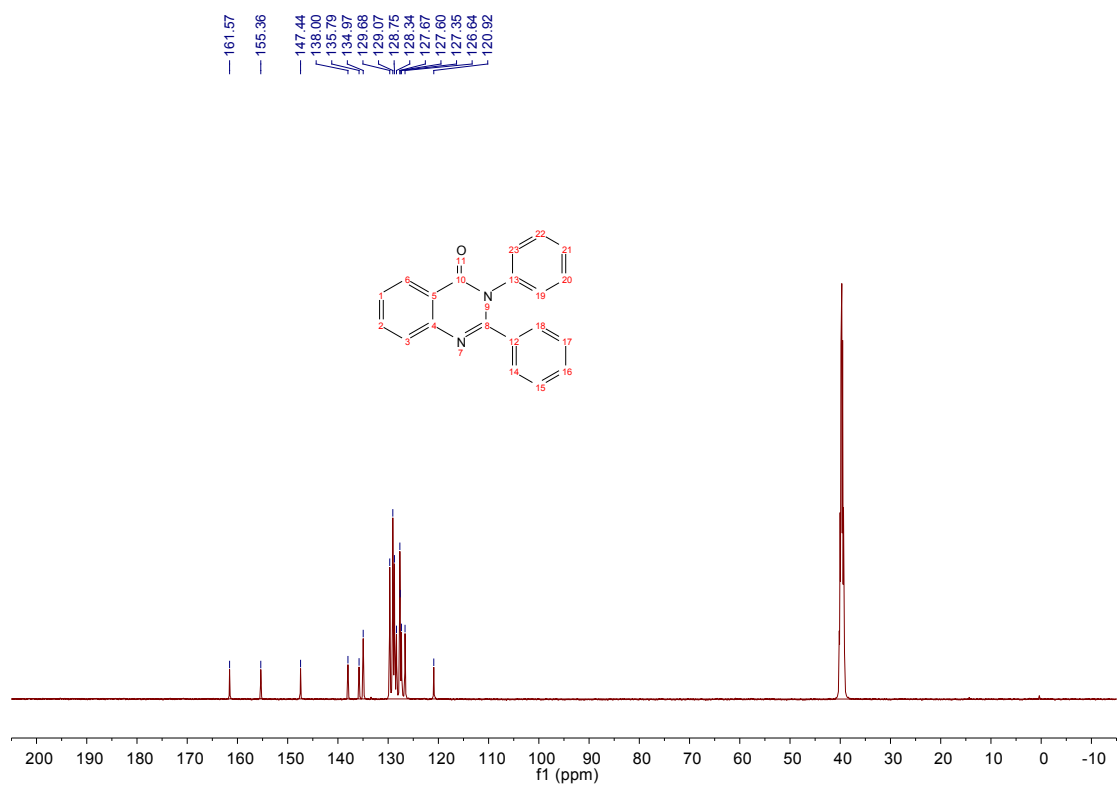

The  $^1\text{H}$  and  $^{13}\text{C}$  NMR spectra of compounds **3id**

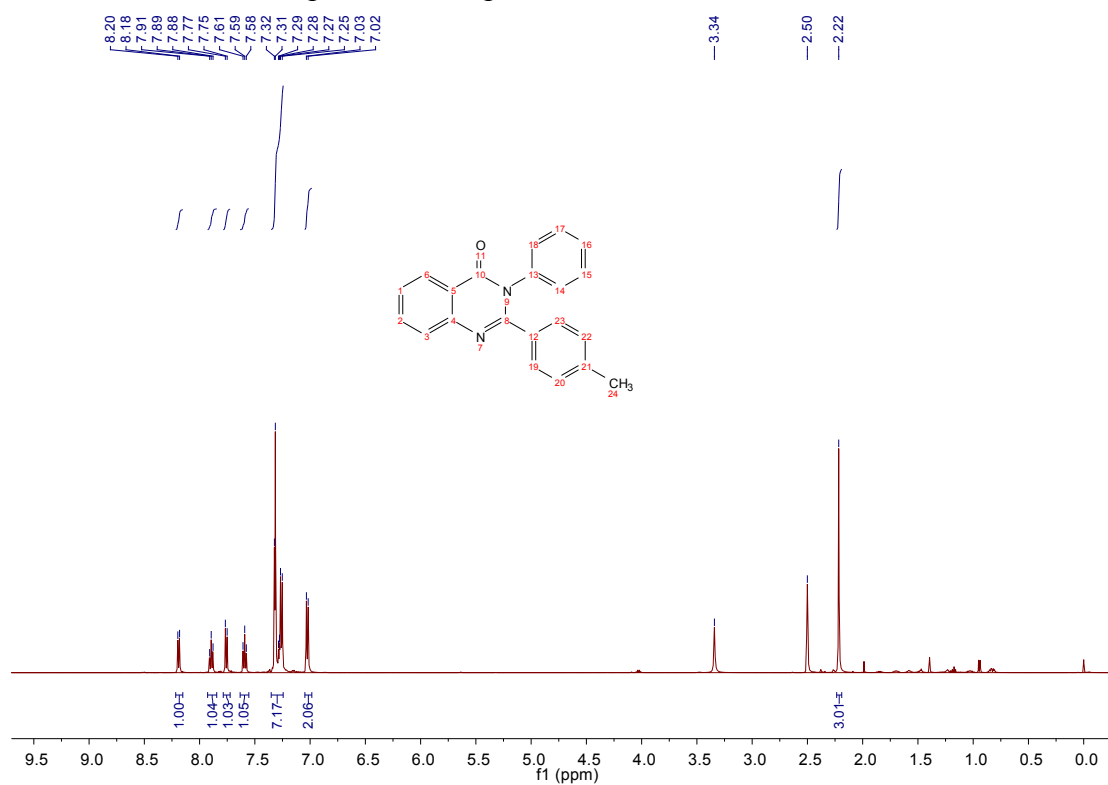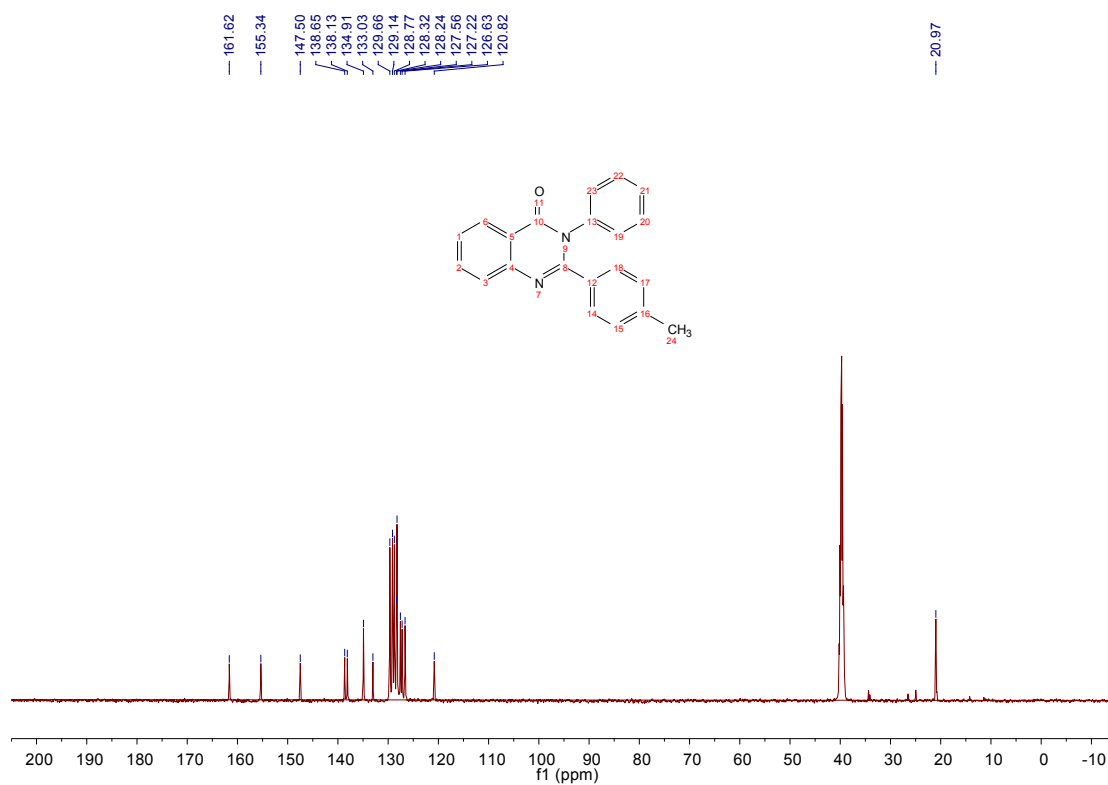



The  $^1\text{H}$  and  $^{13}\text{C}$  NMR spectra of compounds 2-phenyl-2,3-dihydroquinazolin-4(1H)-one

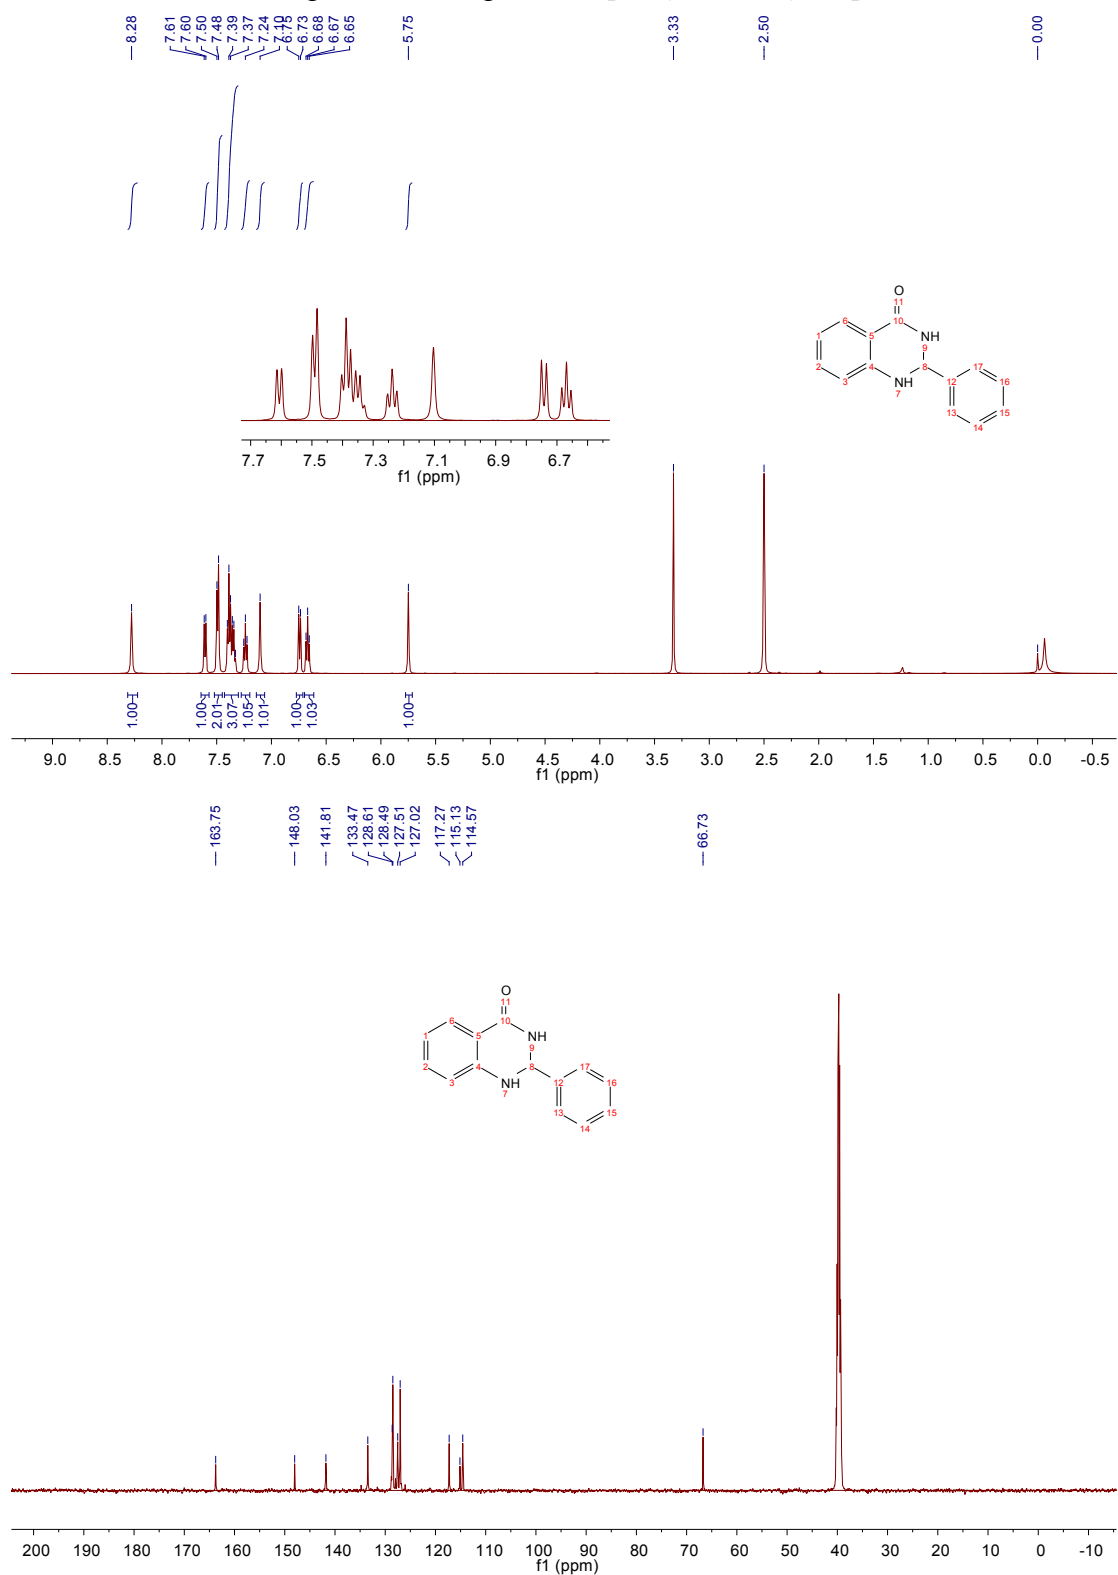

Supplement: c6ra12164k1.pdf [file c6ra12164k1.pdf]
